# Supplementary material for: Mechanochemical arylative detrifluoromethylation of trifluoromethylarenes
Source: Royal Society of Chemistry journal article supplement (doi:10.1039/d3ob00787a), 2023-01-01
Supplement: d3ob00787a1.pdf [file d3ob00787a1.pdf]

# Mechanochemical Arylative Detrifluoromethylation of Trifluoromethylarenes

Satenik Mkrtchyan,<sup>a</sup> Mohanad Shkooor,<sup>b</sup> Sehrish Sarfaraz,<sup>c</sup> Khurshid Ayub,<sup>c</sup> Viktor O. Iaroshenko.<sup>a\*</sup>

<sup>a</sup>Department of Chemistry, Faculty of Natural Sciences, Matej Bel University, Tajovského 40, 97401, Banská Bystrica (Slovakia).

<sup>b</sup>Department of Chemistry and Earth Sciences, Qatar University, P.O. Box 2713, Doha (Qatar).

<sup>c</sup>Department of Chemistry, COMSATS University, Abbottabad Campus, Abbottabad, KPK, 22060 (Pakistan).

## Table of Contents

|                                                                   |     |
|-------------------------------------------------------------------|-----|
| (A) Experimental Section .....                                    | S3  |
| I. Scope of substrates used .....                                 | S3  |
| II. Reaction condition screening .....                            | S5  |
| III. Reaction procedures with optimized reaction conditions ..... | S7  |
| (B) Characterization of products .....                            | S8  |
| (C) Copies $^1\text{H}$ and $^{13}\text{C}$ NMR spectra .....     | S29 |
| (D) Computational study .....                                     | S96 |

## (A) Experimental Section.

Commercially available starting materials, reagents, catalysts, anhydrous and degassed solvents were used without further purification. Flash column chromatography was performed with Merck Silica gel 60 (230-400 mesh). The solvents for column chromatography were distilled before the use. Thin layer chromatography was carried out using Merck TLC Silica gel 60 F<sub>254</sub> and visualized by short-wavelength ultraviolet light or by treatment with potassium permanganate (KMnO<sub>4</sub>) stain. <sup>1</sup>H, <sup>13</sup>C and <sup>19</sup>F NMR spectra were recorded on a Bruker 250, 400 and 500 MHz at 20°C. All <sup>1</sup>H NMR spectra are reported in parts per million (ppm) downfield of TMS and were measured relative to the signals for CHCl<sub>3</sub> (7.26 ppm) and DMSO (2.50 ppm). All <sup>13</sup>C{<sup>1</sup>H} NMR spectra were reported in ppm relative to residual CHCl<sub>3</sub> (77.00 ppm) or DMSO (39.70 ppm) and were obtained with <sup>1</sup>H decoupling. Coupling constants, *J*, are reported in Hertz (Hz). Gas chromatographic analyses was performed on Gas Chromatograph Mass Spectrometer GCMS-QP2010 Ultra instrument. Mechanochemical synthesis was performed using the Retsch MM400 mill using the standard kit. Liquid chemicals were dosed using gas tight micro syringes. Isolation of obtained compounds was achieved by column chromatography on Silica gel. All commercially available compounds were purchased from appropriate vendors.

### A-1. Scope of substrates used.

#### Scope of ArCF<sub>3</sub>:

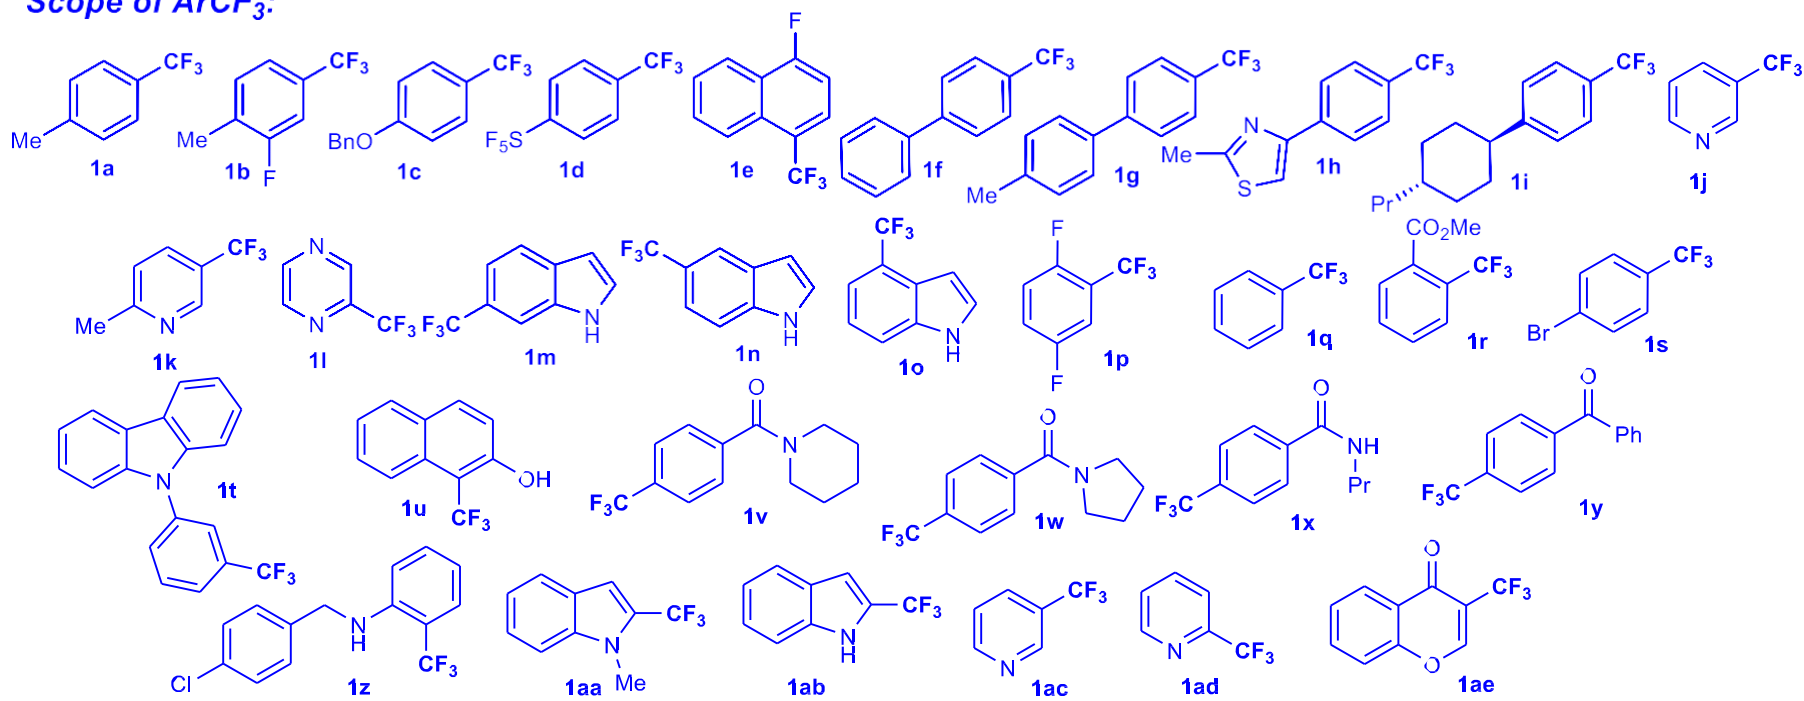

**Scheme S1.** List of ArCF<sub>3</sub> used.

**Scope of benzonitriles:**

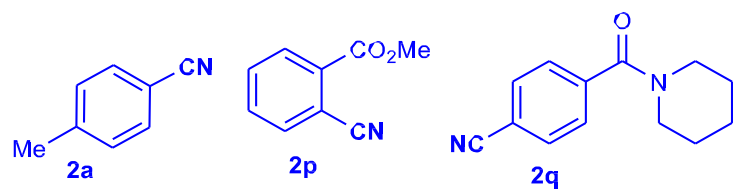

**Scheme S2.** Nitriles used in this study.

**Scope of boronic acids:**

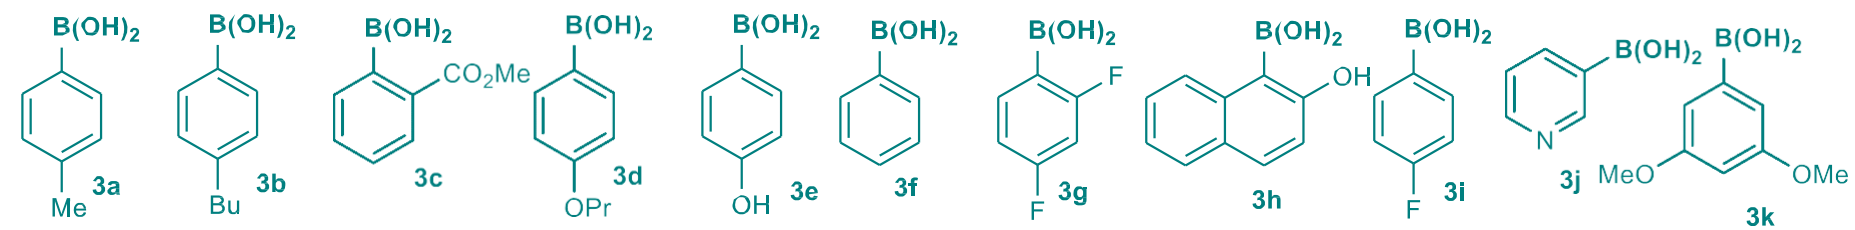

**Scheme S3.** List of boronic acids used.

## A-2. Reaction condition screening.

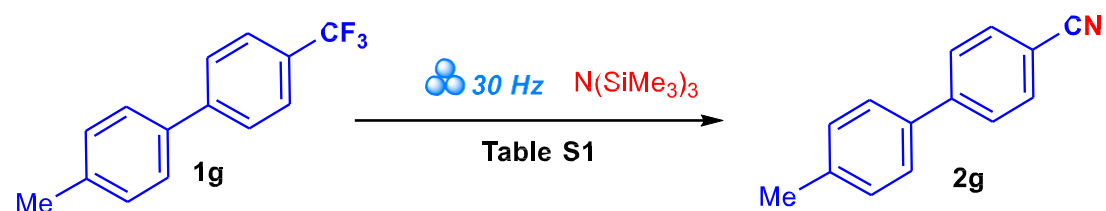

| Table S1 |                                                                                                                                                               |                   |              |
|----------|---------------------------------------------------------------------------------------------------------------------------------------------------------------|-------------------|--------------|
| Entr.    | Reaction components                                                                                                                                           | Frequency/Time    | Yield (%) 2g |
| 1        | ArCF <sub>3</sub> (1 equiv.), N(SiMe <sub>3</sub> ) <sub>3</sub> (1.3 equiv.), ZrO <sub>2</sub> (1 equiv.), NaHCO <sub>3</sub> (4 equiv.), r.t.               | 30Hz/60min        | 0            |
| 2        | ArCF <sub>3</sub> (1 equiv.), N(SiMe <sub>3</sub> ) <sub>3</sub> (1.3 equiv.), ZrN (1 equiv.), NaHCO <sub>3</sub> (4 equiv.), r.t.                            | 30Hz/60min        | 0            |
| 3        | ArCF <sub>3</sub> (1 equiv.), N(SiMe <sub>3</sub> ) <sub>3</sub> (1.3 equiv.), La <sub>2</sub> O <sub>3</sub> (1 equiv.), NaHCO <sub>3</sub> (4 equiv.), r.t. | 30Hz/60min        | 37           |
| 4        | ArCF <sub>3</sub> (1 equiv.), N(SiMe <sub>3</sub> ) <sub>3</sub> (1.3 equiv.), Dy <sub>2</sub> O <sub>3</sub> (1 equiv.), NaHCO <sub>3</sub> (4 equiv.), r.t. | 30Hz/60min        | 32           |
| <b>5</b> | <b>ArCF<sub>3</sub> (1 equiv.), N(SiMe<sub>3</sub>)<sub>3</sub> (1.3 equiv.), Yb<sub>2</sub>O<sub>3</sub> (1 equiv.), NaHCO<sub>3</sub> (4 equiv.), r.t.</b>  | <b>30Hz/60min</b> | <b>95</b>    |
| 6        | ArCF <sub>3</sub> (1 equiv.), N(SiMe <sub>3</sub> ) <sub>3</sub> (1.3 equiv.), Eu <sub>2</sub> O <sub>3</sub> (1 equiv.), NaHCO <sub>3</sub> (4 equiv.), r.t. | 30Hz/60min        | 14           |
| 7        | ArCF <sub>3</sub> (1 equiv.), N(SiMe <sub>3</sub> ) <sub>3</sub> (1.3 equiv.), Ce <sub>2</sub> O <sub>3</sub> (1 equiv.), NaHCO <sub>3</sub> (4 equiv.), r.t. | 30Hz/60min        | 17           |

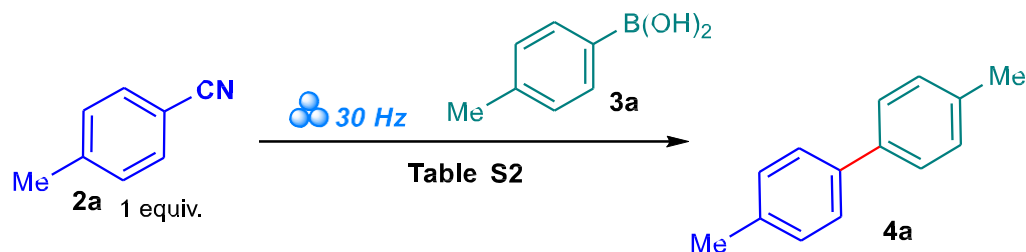

| Table S2 |                                                                                                                                        |                |              |
|----------|----------------------------------------------------------------------------------------------------------------------------------------|----------------|--------------|
| Entr.    | Reaction components                                                                                                                    | Frequency/Time | Yield (%) 4a |
| 1        | ArB(OH) <sub>2</sub> (1.2 equiv.), NiCl <sub>2</sub> (0.1 equiv.), dppe (0.1 equiv.), Na <sub>2</sub> CO <sub>3</sub> (2 equiv.), r.t. | 30Hz/60min     | 0            |
| 2        | ArB(OH) <sub>2</sub> (1.2 equiv.), NiCl <sub>2</sub> (0.1 equiv.), dppp (0.1 equiv.), Na <sub>2</sub> CO <sub>3</sub> (2 equiv.), r.t. | 30Hz/60min     | 0            |
| 3        | ArB(OH) <sub>2</sub> (1.2 equiv.), NiBr <sub>2</sub> (0.1 equiv.), dppe (0.1 equiv.), Na <sub>2</sub> CO <sub>3</sub> (2 equiv.), r.t. | 30Hz/60min     | 11           |
| 4        | ArB(OH) <sub>2</sub> (1.2 equiv.), NiBr <sub>2</sub> (0.1 equiv.), dppp (0.1 equiv.), Na <sub>2</sub> CO <sub>3</sub> (2 equiv.), r.t. | 30Hz/60min     | 13           |

|          |                                                                                                                                                                              |                   |           |
|----------|------------------------------------------------------------------------------------------------------------------------------------------------------------------------------|-------------------|-----------|
| 5        | ArB(OH) <sub>2</sub> (1.2 equiv.), NiCl <sub>2</sub> (0.1 equiv.), PCy <sub>3</sub> (0.3 equiv.), Na <sub>2</sub> CO <sub>3</sub> (2 equiv.), r.t.                           | 30Hz/60min        | 27        |
| 6        | ArB(OH) <sub>2</sub> (1.2 equiv.), NiBr <sub>2</sub> (0.1 equiv.), 1,1'-bis(dialkyl/diarylphosphino)ferrocene (0.1 equiv.), Na <sub>2</sub> CO <sub>3</sub> (2 equiv.), r.t. | 30Hz/60min        | 45        |
| 7        | ArB(OH) <sub>2</sub> (1.2 equiv.), Ni[PCy <sub>3</sub> ] <sub>2</sub> Br <sub>2</sub> (0.1 equiv.), Na <sub>2</sub> CO <sub>3</sub> (2 equiv.), r.t.                         | 30Hz/60min        | 71        |
| <b>8</b> | <b>ArB(OH)<sub>2</sub> (1.2 equiv.), NiBr<sub>2</sub> (0.1 equiv.), PCy<sub>3</sub> (0.3 equiv.), Na<sub>2</sub>CO<sub>3</sub> (2 equiv.), r.t.</b>                          | <b>30Hz/60min</b> | <b>91</b> |
| 9        | ArB(OH) <sub>2</sub> (1.5 equiv.), NiBr <sub>2</sub> (0.1 equiv.), PCy <sub>3</sub> (0.3 equiv.), Na <sub>2</sub> CO <sub>3</sub> (2 equiv.), r.t.                           | 30Hz/60min        | 92        |

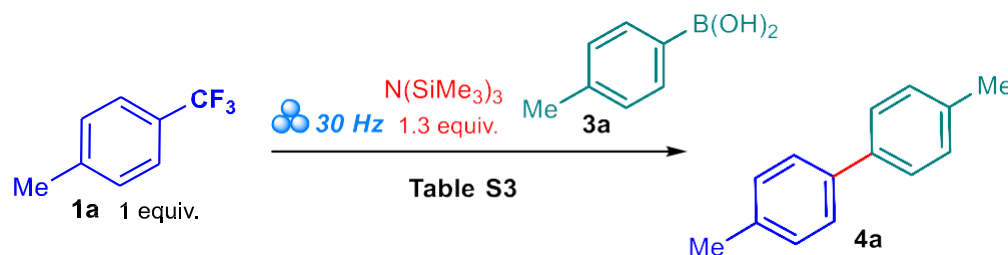

| Table S3 |                                                                                                                                                                                               |                   |                 |
|----------|-----------------------------------------------------------------------------------------------------------------------------------------------------------------------------------------------|-------------------|-----------------|
| Entr.    | Reaction components                                                                                                                                                                           | Frequency/Time    | Yield (%)<br>4a |
| <b>1</b> | <b>ArB(OH)<sub>2</sub> (1.2 equiv.), NiBr<sub>2</sub> (0.1 equiv.), PCy<sub>3</sub> (0.3 equiv.), Yb<sub>2</sub>O<sub>3</sub> (1 equiv.), Na<sub>2</sub>CO<sub>3</sub> (4 equiv.), r.t.</b>   | <b>30Hz/90min</b> | <b>87</b>       |
| 2        | ArB(OH) <sub>2</sub> (1.5 equiv.), NiBr <sub>2</sub> (0.1 equiv.), PCy <sub>3</sub> (0.3 equiv.), Yb <sub>2</sub> O <sub>3</sub> (1 equiv.), Na <sub>2</sub> CO <sub>3</sub> (4 equiv.), r.t. | 30Hz/90min        | 72              |
| 3        | ArB(OH) <sub>2</sub> (1.2 equiv.), Ni[PCy <sub>3</sub> ] <sub>2</sub> Br <sub>2</sub> (0.1 equiv.), Na <sub>2</sub> CO <sub>3</sub> (2 equiv.), r.t.                                          | 30Hz/90min        | 53              |

### A-3. Reaction procedure with optimised reaction conditions.

#### ***General procedure for the synthesis of nitriles 2 starting from trifluoromethyl arenes 1:***

In air, to 5 mL grinding vessel (made of stainless) equipped with two balls (made of stainless, diameter: 5 mm) was placed consequently N(SiMe<sub>3</sub>)<sub>3</sub> (304 mg, 1.3 mmol, 1.3 equiv.), Yb<sub>2</sub>O<sub>3</sub> (394 mg, 1 mmol, 1 equiv.), NaHCO<sub>3</sub> (336 mg, 4 mmol, 4 equiv.); then the appropriate CF<sub>3</sub> substrate (1 mmol, 1 equiv.) was added and the reaction vessel was properly capped. Finally, the reaction vessel was installed on the mill and subjected to milling at 30 Hz for 60 minutes at room temperature. After completion of the reaction, the resulted crude was directly subjected to gradient flash chromatography on silica gel to isolate the desired nitrile derivative.

The gram scale synthesis was performed on 10 mmol of the starting nitro substrate in a 25 mL grinding vessel by using three 10 mm balls.

#### ***General procedure for the synthesis of biphenyls 4 starting from nitriles 2:***

In glovebox under the Ar atmosphere, to 5 mL grinding vessel (made of stainless) equipped with two balls (made of stainless, diameter: 5 mm) was placed consequently Na<sub>2</sub>CO<sub>3</sub> (212 mg, 2 mmol, 2 equiv.), NiBr<sub>2</sub> (22 mg, 0.1 mmol, 0.1 equiv.), PCy<sub>3</sub> (84 mg, 0.3 mmol, 0.3 equiv.); then the appropriate nitrile (1 mmol, 1 equiv.) and the appropriate boronic acid (1.2 mmol, 1.2 equiv.) was added and the reaction vessel was properly capped. Finally, the reaction vessel was installed on the mill and subjected to milling at 30 Hz for 60 minutes at room temperature. After completion of the reaction, the resulted crude was directly subjected to gradient flash chromatography on silica gel to isolate the desired biphenyl derivative.

The gram scale synthesis was performed on 10 mmol of the starting nitro substrate in a 25 mL grinding vessel by using three 10 mm balls.

#### ***General procedure for the synthesis of biphenyls 4 starting from trifluoromethyl arenes 1:***

In glovebox under the Ar atmosphere, to 5 mL grinding vessel (made of stainless) equipped with two balls (made of stainless, diameter: 5 mm) was placed consequently N(SiMe<sub>3</sub>)<sub>3</sub> (304 mg, 1.3 mmol, 1.3 equiv.), Yb<sub>2</sub>O<sub>3</sub> (394 mg, 1 mmol, 1 equiv.), Na<sub>2</sub>CO<sub>3</sub> (424 mg, 4 mmol, 4 equiv.), NiBr<sub>2</sub> (22 mg, 0.1 mmol, 0.1 equiv.), PCy<sub>3</sub> (84 mg, 0.3 mmol, 0.3 equiv.); then the appropriate CF<sub>3</sub> substrate (1 mmol, 1 equiv.) and the appropriate boronic acid (1.2 mmol, 1.2 equiv.) was added and the reaction vessel was properly capped. Finally, the reaction vessel was installed on the mill and subjected to milling at 30 Hz for 90 minutes at room temperature. After completion of the reaction, the resulted crude was directly subjected to gradient flash chromatography on silica gel to isolate the desired biphenyl derivative.

The gram scale synthesis was performed on 10 mmol of the starting nitro substrate in a 25 mL grinding vessel by using three 10 mm balls.

## (B) Characterization of products

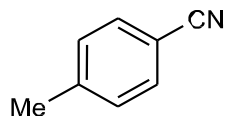

### **4-methylbenzonitrile 2a.**

The title compound was prepared starting from  $N(\text{SiMe}_3)_3$  (304 mg, 1.3 mmol, 1.3 equiv.),  $\text{Yb}_2\text{O}_3$  (394 mg, 1 mmol, 1 equiv.),  $\text{NaHCO}_3$  (336 mg, 4 mmol, 4 equiv.) and appropriate  $\text{CF}_3$  substrate **1a** (160 mg, 1 mmol, 1 equiv.). The purification was accomplished by column chromatography on silica gel to provide the desired nitrile **2a** (106 mg, 0.91 mmol, 91%). The gram scale synthesis was performed on 10 mmol of the starting **1a** and the nitrile **2a** was prepared in 87% yield (1.01 g, 8.7 mmol).

Low melting white solid.  $^1\text{H NMR}$  (500 MHz,  $\text{CDCl}_3$ ):  $\delta$  2.36 (s, 3H, Me), 7.21 (d, 2H,  $^3J = 8.2$  Hz,  $\text{CH}_{\text{Ar}}$ ), 7.46 (d, 2H,  $^3J = 8.2$  Hz,  $\text{CH}_{\text{Ar}}$ ).

$^{13}\text{C NMR}$  (126 MHz,  $\text{CDCl}_3$ ):  $\delta$  21.5, 108.9, 117.9, 129.6, 131.7, 143.5.

MS (GC, 70eV):  $m/z$  (%) = 117 ( $\text{M}^+$ , 100), 90 (38).

Anal. calcd. for  $\text{C}_8\text{H}_7\text{N}$ : C 82.02; H, 6.02; N 11.96. Found: C 82.19; H, 6.30; N 11.51.

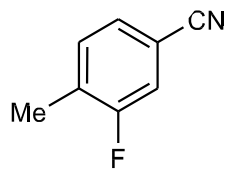

### **3-fluoro-4-methylbenzonitrile 2b.**

The title compound was prepared starting from  $N(\text{SiMe}_3)_3$  (304 mg, 1.3 mmol, 1.3 equiv.),  $\text{Yb}_2\text{O}_3$  (394 mg, 1 mmol, 1 equiv.),  $\text{NaHCO}_3$  (336 mg, 4 mmol, 4 equiv.) and appropriate  $\text{CF}_3$  substrate **1b** (178 mg, 1 mmol, 1 equiv.). The purification was accomplished by column chromatography



on silica gel to provide the desired nitrile **2b** (121 mg, 0.90 mmol, 90%). The gram scale synthesis was performed on 10 mmol of the starting **1b** and the nitrile **2b** was prepared in 82% yield (1.10 g, 8.2 mmol).

White solid, mp 83 - 84 °C. <sup>1</sup>H NMR (500 MHz, CDCl<sub>3</sub>): δ 2.34 (d, 3H, <sup>4</sup>J = 1.8 Hz, Me), 7.28 – 7.31 (m, 2H, CH<sub>Ar</sub>), 7.35 (dd, 1H, <sup>3</sup>J = 7.8 Hz, <sup>4</sup>J = 1.3 Hz, CH<sub>Ar</sub>).

<sup>13</sup>C NMR (126 MHz, CDCl<sub>3</sub>): δ 14.9, 110.9 (d, *J*<sub>CF</sub> = 10.2 Hz), 117.8 (d, *J*<sub>CF</sub> = 3.0 Hz), 118.1 (d, *J*<sub>CF</sub> = 25.7 Hz), 127.9 (d, *J*<sub>CF</sub> = 3.8 Hz), 131.3 (d, *J*<sub>CF</sub> = 16.9 Hz), 132.4 (d, *J*<sub>CF</sub> = 5.5 Hz), 160.7 (d, <sup>1</sup>*J*<sub>CF</sub> = 251.7 Hz).

MS (GC, 70eV): *m/z* (%) = 135 (M<sup>+</sup>, 100), 108 (34).

Anal. calcd. for C<sub>8</sub>H<sub>6</sub>NF: C 71.10; H, 4.48; N 10.36. Found: C 71.23; H, 4.43; N 10.42.

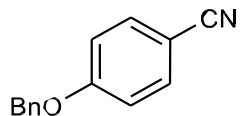

#### **4-(benzyloxy)benzonitrile 2c.**

The title compound was prepared starting from N(SiMe<sub>3</sub>)<sub>3</sub> (304 mg, 1.3 mmol, 1.3 equiv.), Yb<sub>2</sub>O<sub>3</sub> (394 mg, 1 mmol, 1 equiv.), NaHCO<sub>3</sub> (336 mg, 4 mmol, 4 equiv.) and appropriate CF<sub>3</sub> substrate **1c** (252 mg, 1 mmol, 1 equiv.). The purification was accomplished by column chromatography on silica gel to provide the desired nitrile **2c** (186 mg, 0.89 mmol, 89%).

White solid, mp 94 - 96 °C. <sup>1</sup>H NMR (500 MHz, CDCl<sub>3</sub>): δ 5.12 (s, 2H, CH<sub>2</sub>), 7.02 (d, 2H, <sup>3</sup>J = 8.8 Hz, CH<sub>Ar</sub>), 7.36 – 7.39 (m, 3H, CH<sub>Ar</sub>), 7.41 (d, 2H, *J* = 4.8 Hz, CH<sub>Ar</sub>), 7.58 (dd, 2H, <sup>3</sup>J = 8.8 Hz, <sup>4</sup>J = 1.8 Hz, CH<sub>Ar</sub>).

<sup>13</sup>C NMR (126 MHz, CDCl<sub>3</sub>): δ 70.2, 104.2, 115.5, 119.1, 127.4, 128.4, 128.7, 134.0, 135.7, 161.9.

MS (GC, 70eV): *m/z* (%) = 209 (M<sup>+</sup>, 4), 91 (100).

Anal. calcd. for C<sub>14</sub>H<sub>11</sub>NO: C 80.36; H, 5.30; N 6.69. Found: C 80.46; H, 5.28; N 6.73.

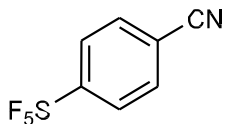

#### **4-(pentafluoro-16-sulfanyl)benzonitrile 2d.**

The title compound was prepared starting from  $N(\text{SiMe}_3)_3$  (304 mg, 1.3 mmol, 1.3 equiv.),  $\text{Yb}_2\text{O}_3$  (394 mg, 1 mmol, 1 equiv.),  $\text{NaHCO}_3$  (336 mg, 4 mmol, 4 equiv.) and appropriate  $\text{CF}_3$  substrate **1d** (272 mg, 1 mmol, 1 equiv.). The purification was accomplished by column chromatography on silica gel to provide the desired nitrile **2d** (183 mg, 0.80 mmol, 80%).

Yellowish solid, mp 103 - 104 °C.  $^1\text{H NMR}$  (500 MHz,  $\text{CDCl}_3$ ):  $\delta$  7.79 (d, 2H,  $^3J = 8.5$  Hz,  $\text{CH}_{\text{Ar}}$ ), 7.89 (d, 2H,  $^3J = 8.7$  Hz,  $\text{CH}_{\text{Ar}}$ ).

$^{13}\text{C NMR}$  (126 MHz,  $\text{CDCl}_3$ ):  $\delta$  115.9, 116.9, 127.0 (m), 132.7, 156.5 (q,  $^2J_{\text{CF}} = 19.5$  Hz).

MS (GC, 70eV):  $m/z$  (%) = 229 ( $\text{M}^+$ , 100), 121 (80), 102 (67).

Anal. calcd. for  $\text{C}_7\text{H}_4\text{NSF}_5$ : C 36.69; H, 1.76; N 6.11. Found: C 36.61; H, 1.63; N 6.19.

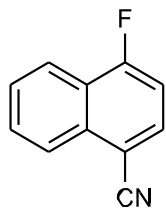

#### **4-fluoro-1-naphthonitrile 2e.**

The title compound was prepared starting from  $N(\text{SiMe}_3)_3$  (304 mg, 1.3 mmol, 1.3 equiv.),  $\text{Yb}_2\text{O}_3$  (394 mg, 1 mmol, 1 equiv.),  $\text{NaHCO}_3$  (336 mg, 4 mmol, 4 equiv.) and appropriate  $\text{CF}_3$  substrate **1e** (214 mg, 1 mmol, 1 equiv.). The purification was accomplished by column chromatography on silica gel to provide the desired nitrile **2e** (150 mg, 0.88 mmol, 88%).

White solid, mp 89 - 91 °C.  $^1\text{H NMR}$  (500 MHz,  $\text{CDCl}_3$ ):  $\delta$  7.11 - 7.15 (m, 1H,  $\text{CH}_{\text{Ar}}$ ), 7.60 - 7.63 (m, 1H,  $\text{CH}_{\text{Ar}}$ ), 7.67 - 7.70 (m, 1H,  $\text{CH}_{\text{Ar}}$ ), 7.80 - 7.83 (m, 1H,  $\text{CH}_{\text{Ar}}$ ), 8.07 (dd, 1H,  $^3J = 8.3$  Hz,  $^4J = 2.3$  Hz,  $\text{CH}_{\text{Ar}}$ ), 8.13 (d, 1H,  $^3J = 8.3$  Hz,  $\text{CH}_{\text{Ar}}$ ).

$^{13}\text{C NMR}$  (126 MHz,  $\text{CDCl}_3$ ):  $\delta$  106.0 (d,  $J_{\text{CF}} = 4.3$  Hz), 109.3 (d,  $J_{\text{CF}} = 21.6$  Hz), 117.0, 121.0 (d,  $J_{\text{CF}} = 4.6$  Hz), 123.2 (d,  $J_{\text{CF}} = 16.9$  Hz), 124.8, 127.7, 129.4, 133.1 (d,  $J_{\text{CF}} = 10.6$  Hz), 133.9 (d,  $J_{\text{CF}} = 6.6$  Hz), 161.3 (d,  $^1J_{\text{CF}} = 263.2$  Hz).

Anal. calcd. for C<sub>11</sub>H<sub>6</sub>NF: C 77.19; H, 3.53; N 8.18. Found: C 77.23; H, 3.48; N 8.21.

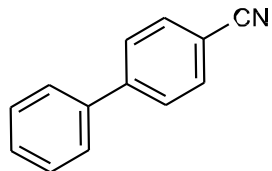

**[1,1'-biphenyl]-4-carbonitrile 2f.**

The title compound was prepared starting from N(SiMe<sub>3</sub>)<sub>3</sub> (304 mg, 1.3 mmol, 1.3 equiv.), Yb<sub>2</sub>O<sub>3</sub> (394 mg, 1 mmol, 1 equiv.), NaHCO<sub>3</sub> (336 mg, 4 mmol, 4 equiv.) and appropriate CF<sub>3</sub> substrate **1f** (222 mg, 1 mmol, 1 equiv.). The purification was accomplished by column chromatography on silica gel to provide the desired nitrile **2f** (168 mg, 0.94 mmol, 94%).

White solid, mp 85 - 87 °C. <sup>1</sup>H NMR (500 MHz, DMSO-*d*<sub>6</sub>): δ 7.42 – 7.45 (m, 1H, CH<sub>Ar</sub>), 7.49 – 7.52 (m, 2H, CH<sub>Ar</sub>), 7.18 – 7.73 (m, 2H, CH<sub>Ar</sub>), 7.85 – 7.86 (m, 2H, CH<sub>Ar</sub>), 7.90 – 7.91 (m, 2H, CH<sub>Ar</sub>).

<sup>13</sup>C NMR (126 MHz, DMSO-*d*<sub>6</sub>): δ 110.0, 118.9, 127.1, 127.6, 128.7, 129.2, 132.8, 138.3, 144.6.

MS (GC, 70eV): m/z (%) = 179 (M<sup>+</sup>, 100), 151 (13).

Anal. calcd. for C<sub>13</sub>H<sub>9</sub>N: C 87.12; H, 5.06; N 7.82. Found: C 87.31; H, 5.11; N 7.58.

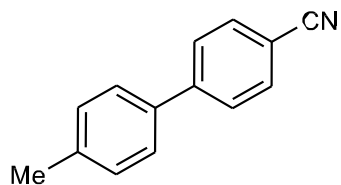

**4'-methyl-[1,1'-biphenyl]-4-carbonitrile 2g.**

The title compound was prepared starting from N(SiMe<sub>3</sub>)<sub>3</sub> (304 mg, 1.3 mmol, 1.3 equiv.), Yb<sub>2</sub>O<sub>3</sub> (394 mg, 1 mmol, 1 equiv.), NaHCO<sub>3</sub> (336 mg, 4 mmol, 4 equiv.) and appropriate CF<sub>3</sub> substrate **1g** (236 mg, 1 mmol, 1 equiv.). The purification was accomplished by column chromatography on silica gel to provide the desired nitrile **2g** (183 mg, 0.95 mmol, 95%).

White solid, mp 110 - 111 °C.  $^1\text{H NMR}$  (500 MHz,  $\text{CDCl}_3$ ):  $\delta$  2.42 (s, 3H, Me), 7.29 (d, 2H,  $^3J = 7.09$  Hz,  $\text{CH}_{\text{Ar}}$ ), 7.50 (d, 2H,  $^3J = 8.1$  Hz,  $\text{CH}_{\text{Ar}}$ ), 7.66 (d, 2H,  $^3J = 8.5$  Hz,  $\text{CH}_{\text{Ar}}$ ), 7.70 (d, 2H,  $^3J = 8.6$  Hz,  $\text{CH}_{\text{Ar}}$ ).

$^{13}\text{C NMR}$  (126 MHz,  $\text{CDCl}_3$ ):  $\delta$  21.1, 110.4, 119.0, 127.0, 127.4, 129.8, 132.5, 136.2, 138.7, 145.5.

MS (GC, 70eV):  $m/z$  (%) = 193 ( $\text{M}^+$ , 100), 151 (13).

Anal. calcd. for  $\text{C}_{14}\text{H}_{11}\text{N}$ : C 87.01; H, 5.74; N 7.25. Found: C 87.31; H, 5.11; N 7.58.

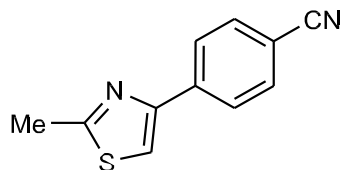

#### **4-(2-methylthiazol-4-yl)benzonitrile **2h**.**

The title compound was prepared starting from  $\text{N}(\text{SiMe}_3)_3$  (304 mg, 1.3 mmol, 1.3 equiv.),  $\text{Yb}_2\text{O}_3$  (394 mg, 1 mmol, 1 equiv.),  $\text{NaHCO}_3$  (336 mg, 4 mmol, 4 equiv.) and appropriate  $\text{CF}_3$  substrate **1h** (243 mg, 1 mmol, 1 equiv.). The purification was accomplished by column chromatography on silica gel to provide the desired nitrile **2h** (174 mg, 0.87 mmol, 87%).

Yellowish solid, mp 154 - 155 °C.  $^1\text{H NMR}$  (500 MHz,  $\text{CDCl}_3$ ):  $\delta$  2.78 (s, 3H, Me), 7.46 (s, 1H,  $\text{CH}_{\text{Ar}}$ ), 7.68 (d, 2H,  $^3J = 8.7$  Hz,  $\text{CH}_{\text{Ar}}$ ), 7.98 (d, 2H,  $^3J = 8.5$  Hz,  $\text{CH}_{\text{Ar}}$ ), 7.70 (d, 2H,  $^3J = 8.7$  Hz,  $\text{CH}_{\text{Ar}}$ ).

$^{13}\text{C NMR}$  (126 MHz,  $\text{CDCl}_3$ ):  $\delta$  19.3, 111.2, 115.2, 118.9, 126.7, 132.6, 138.5, 153.1, 166.6.

MS (GC, 70eV):  $m/z$  (%) = 200 ( $\text{M}^+$ , 69), 159 (100).

Anal. calcd. for  $\text{C}_{11}\text{H}_8\text{N}_2\text{S}$ : C 65.98; H, 4.03; N 13.99. Found: C 66.06; H, 4.09; N 14.07.

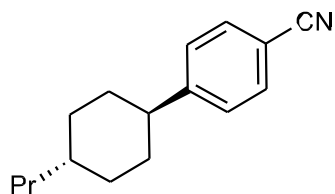

**4-((1*s*,4*r*)-4-propylcyclohexyl)benzotrile 2i.**

The title compound was prepared starting from N(SiMe<sub>3</sub>)<sub>3</sub> (304 mg, 1.3 mmol, 1.3 equiv.), Yb<sub>2</sub>O<sub>3</sub> (394 mg, 1 mmol, 1 equiv.), NaHCO<sub>3</sub> (336 mg, 4 mmol, 4 equiv.) and appropriate CF<sub>3</sub> substrate **1i** (270 mg, 1 mmol, 1 equiv.). The purification was accomplished by column chromatography on silica gel to provide the desired nitrile **2i** (193 mg, 0.85 mmol, 85%).

White solid, mp 45 - 46 °C. <sup>1</sup>H NMR (500 MHz, CDCl<sub>3</sub>): δ 0.90 (t, 3H, CH<sub>3</sub>), 1.04 – 1.10 (m, 2H, Cy), 1.20 – 1.45 (m, 7H, Cy), 1.86 (br, s, 2H, CH<sub>2</sub>), 1.89 (br, s, 2H, CH<sub>2</sub>), 2.51 (tt, 1H, <sup>3</sup>J = 12.7 Hz, <sup>4</sup>J = 3.0 Hz, Cy), 7.29 (d, 2H, <sup>3</sup>J = 8.2 Hz, CH<sub>Ar</sub>), 7.56 (d, 2H, <sup>3</sup>J = 8.2 Hz, CH<sub>Ar</sub>).

<sup>13</sup>C NMR (126 MHz, CDCl<sub>3</sub>): δ 14.4, 20.0, 33.2, 33.9, 36.9, 39.6, 44.8, 109.6, 119.2, 127.7, 132.2, 153.4.

MS (GC, 70eV): m/z (%) = 227 (M<sup>+</sup>, 93), 142 (50), 129 (100), 122 (44), 116 (87).

Anal. calcd. for C<sub>16</sub>H<sub>21</sub>N: C 84.53; H, 9.31; N 6.16. Found: C 84.63; H, 9.26; N 6.11.

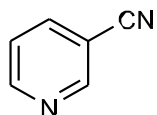

**nicotinonitrile 2j.**

The title compound was prepared starting from N(SiMe<sub>3</sub>)<sub>3</sub> (304 mg, 1.3 mmol, 1.3 equiv.), Yb<sub>2</sub>O<sub>3</sub> (394 mg, 1 mmol, 1 equiv.), NaHCO<sub>3</sub> (336 mg, 4 mmol, 4 equiv.) and appropriate CF<sub>3</sub> substrate **1j** (147 mg, 1 mmol, 1 equiv.). The purification was accomplished by column chromatography on silica gel to provide the desired nitrile **2j** (83 mg, 0.80 mmol, 80%).

Yellowish solid, mp 49 - 50 °C. <sup>1</sup>H NMR (500 MHz, CDCl<sub>3</sub>): δ 7.39 – 7.42 (m, 1H, CH<sub>Ar</sub>), 7.92 – 7.95 (m, 1H, CH<sub>Ar</sub>), 8.76 – 8.77 (m, 1H, CH<sub>Ar</sub>), 8.83 (s, 1H, CH<sub>Ar</sub>).

<sup>13</sup>C NMR (126 MHz, CDCl<sub>3</sub>): δ 110.1, 116.6, 123.7, 139.3, 152.5, 153.0.

MS (GC, 70eV): m/z (%) = 104 (M<sup>+</sup>, 100), 77 (65).

Anal. calcd. for C<sub>6</sub>H<sub>4</sub>N<sub>2</sub>: C 69.22; H, 3.87; N 26.91. Found: C 69.31; H, 3.79; N 26.90.

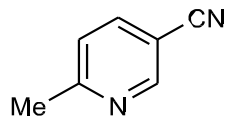

**6-methylnicotinonitrile 2k.**

The title compound was prepared starting from  $\text{N}(\text{SiMe}_3)_3$  (304 mg, 1.3 mmol, 1.3 equiv.),  $\text{Yb}_2\text{O}_3$  (394 mg, 1 mmol, 1 equiv.),  $\text{NaHCO}_3$  (336 mg, 4 mmol, 4 equiv.) and appropriate  $\text{CF}_3$  substrate **1k** (161 mg, 1 mmol, 1 equiv.). The purification was accomplished by column chromatography on silica gel to provide the desired nitrile **2k** (97 mg, 0.82 mmol, 82%).

Yellowish solid, mp 84 - 86 °C.  $^1\text{H NMR}$  (500 MHz,  $\text{CDCl}_3$ ):  $\delta$  2.54 (s, 3H, Me), 7.21 (d, 1H,  $^3J = 8.1$  Hz,  $\text{CH}_{\text{Ar}}$ ), 7.76 (dd, 1H,  $^3J = 8.2$  Hz,  $^4J = 2.0$  Hz,  $\text{CH}_{\text{Ar}}$ ), 8.66 (s, 1H,  $\text{CH}_{\text{Ar}}$ ).

$^{13}\text{C NMR}$  (126 MHz,  $\text{CDCl}_3$ ):  $\delta$  24.7, 106.7, 116.7, 123.1, 139.0, 151.7, 162.9.

Anal. calcd. for  $\text{C}_7\text{H}_6\text{N}_2$ : C 71.17; H, 5.12; N 23.71. Found: C 71.23; H, 5.19; N 23.58.

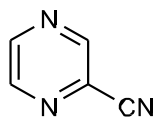

**pyrazine-2-carbonitrile 2l.**

The title compound was prepared starting from  $\text{N}(\text{SiMe}_3)_3$  (304 mg, 1.3 mmol, 1.3 equiv.),  $\text{Yb}_2\text{O}_3$  (394 mg, 1 mmol, 1 equiv.),  $\text{NaHCO}_3$  (336 mg, 4 mmol, 4 equiv.) and appropriate  $\text{CF}_3$  substrate **1l** (148 mg, 1 mmol, 1 equiv.). The purification was accomplished by column chromatography on silica gel to provide the desired nitrile **2l** (83 mg, 0.79 mmol, 79%).

Colorless liquid.  $^1\text{H NMR}$  (500 MHz,  $\text{CDCl}_3$ ):  $\delta$  8.67 (br. s, 1H,  $\text{CH}_{\text{Ar}}$ ), 7.75 (d, 1H,  $^4J = 2.4$  Hz,  $\text{CH}_{\text{Ar}}$ ), 8.86 (s, 1H,  $\text{CH}_{\text{Ar}}$ ).

$^{13}\text{C NMR}$  (126 MHz,  $\text{CDCl}_3$ ):  $\delta$  115.1, 130.5, 145.3, 147.3, 148.0.

Anal. calcd. for  $\text{C}_5\text{H}_3\text{N}_3$ : C 57.14; H, 2.88; N 39.98. Found: C 57.23; H, 2.61; N 40.16.

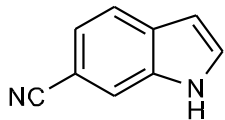

**1H-indole-6-carbonitrile 2m.**

The title compound was prepared starting from  $N(\text{SiMe}_3)_3$  (304 mg, 1.3 mmol, 1.3 equiv.),  $\text{Yb}_2\text{O}_3$  (394 mg, 1 mmol, 1 equiv.),  $\text{NaHCO}_3$  (336 mg, 4 mmol, 4 equiv.) and appropriate  $\text{CF}_3$  substrate **1m** (185 mg, 1 mmol, 1 equiv.). The purification was accomplished by column chromatography on silica gel to provide the desired nitrile **2m** (116 mg, 0.82 mmol, 82%).

Yellow solid, mp 126 - 127 °C.  $^1\text{H NMR}$  (500 MHz,  $\text{CDCl}_3$ ):  $\delta$  6.63 (s, 1H,  $\text{CH}_{\text{Ar}}$ ), 7.35 (d, 1H,  $^3J = 8.4$  Hz,  $\text{CH}_{\text{Ar}}$ ), 7.43 (s, 1H,  $\text{CH}_{\text{Ar}}$ ), 7.70 (d, 1H,  $^3J = 8.4$  Hz,  $\text{CH}_{\text{Ar}}$ ), 7.78 (s, 1H,  $\text{CH}_{\text{Ar}}$ ), 8.78 (br. s, 1H, NH).

$^{13}\text{C NMR}$  (126 MHz,  $\text{CDCl}_3$ ):  $\delta$  103.3, 104.0, 116.1, 120.8, 121.5, 122.6, 128.2, 131.2, 134.6.

HRMS (TOF MS ES+)  $m/z$ :  $[\text{M} + \text{H}]^+$ : Calcd for  $\text{C}_9\text{H}_7\text{N}_2$  143.0615. Found 143.0609.

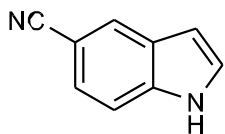

**1H-indole-5-carbonitrile 2n.**

The title compound was prepared starting from  $N(\text{SiMe}_3)_3$  (304 mg, 1.3 mmol, 1.3 equiv.),  $\text{Yb}_2\text{O}_3$  (394 mg, 1 mmol, 1 equiv.),  $\text{NaHCO}_3$  (336 mg, 4 mmol, 4 equiv.) and appropriate  $\text{CF}_3$  substrate **1n** (185 mg, 1 mmol, 1 equiv.). The purification was accomplished by column chromatography on silica gel to provide the desired nitrile **2n** (113 mg, 0.80 mmol, 80%).

Yellowish solid, mp 106 - 107 °C.  $^1\text{H NMR}$  (500 MHz,  $\text{CDCl}_3$ ):  $\delta$  6.62 (s, 1H,  $\text{CH}_{\text{Ar}}$ ), 7.36 (t, 1H,  $^4J = 2.7$  Hz,  $\text{CH}_{\text{Ar}}$ ), 7.41 (dd, 1H,  $^3J = 8.6$  Hz,  $^4J = 1.4$  Hz,  $\text{CH}_{\text{Ar}}$ ), 7.50 (d, 1H,  $^3J = 8.6$  Hz,  $\text{CH}_{\text{Ar}}$ ), 7.99 (s, 1H,  $\text{CH}_{\text{Ar}}$ ), 9.07 (br. s, 1H, NH).

$^{13}\text{C NMR}$  (126 MHz,  $\text{CDCl}_3$ ):  $\delta$  102.1, 103.0, 121.0, 124.5, 126.2, 126.7, 127.5, 137.5.

Anal. calcd. for  $\text{C}_9\text{H}_6\text{N}_2$ : C 76.04; H, 4.25; N 19.71. Found: C 75.96; H, 4.12; N 19.92.

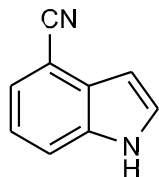

**1H-indole-4-carbonitrile 2o.**

The title compound was prepared starting from  $N(\text{SiMe}_3)_3$  (304 mg, 1.3 mmol, 1.3 equiv.),  $\text{Yb}_2\text{O}_3$  (394 mg, 1 mmol, 1 equiv.),  $\text{NaHCO}_3$  (348 mg, 4 mmol, 4 equiv.) and appropriate  $\text{CF}_3$  substrate **1o** (185 mg, 1 mmol, 1 equiv.). The purification was accomplished by column chromatography on silica gel to provide the desired nitrile **2o** (119 mg, 0.84 mmol, 84%).

Yellowish solid, mp 118 - 120 °C.  **$^1\text{H NMR}$**  (500 MHz,  $\text{CDCl}_3$ ):  $\delta$  6.75 (s, 1H,  $\text{CH}_{\text{Ar}}$ ), 7.22 (t, 1H,  $^3J = 7.4$  Hz,  $\text{CH}_{\text{Ar}}$ ), 7.41 (d, 1H,  $^4J = 2.8$  Hz,  $\text{CH}_{\text{Ar}}$ ), 7.47 (d, 1H,  $^3J = 7.4$  Hz,  $\text{CH}_{\text{Ar}}$ ), 7.67 (d, 1H,  $^3J = 8.2$  Hz,  $\text{CH}_{\text{Ar}}$ ), 8.94 (br. s, 1H, NH).

**$^{13}\text{C NMR}$**  (126 MHz,  $\text{CDCl}_3$ ):  $\delta$  116.2, 119.0, 121.4, 125.2, 127.1, 129.1, 135.5.

Anal. calcd. for  $\text{C}_9\text{H}_6\text{N}_2$ : C 76.04; H, 4.25; N 19.71. Found: C 76.16; H, 4.29; N 19.55.

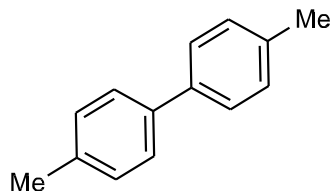

**4,4'-dimethyl-1,1'-biphenyl 4a.**

The title compound was prepared starting from  $\text{Na}_2\text{CO}_3$  (212 mg, 2 mmol, 2 equiv.),  $\text{NiBr}_2$  (22 mg, 0.1 mmol, 0.1 equiv.),  $\text{PCy}_3$  (83 mg, 0.3 mmol, 0.3 equiv.), nitrile **2a** (117 mg, 1 mmol, 1 equiv.) and boronic acid **3a** (136 mg, 1.2 mmol, 1.2 equiv.). The purification was accomplished by column chromatography on silica gel to provide the desired biphenyl **4a** (165 mg, 0.91 mmol, 91%). The gram scale synthesis was performed on 10 mmol of the starting nitrile **2a** and the biphenyl **4a** was prepared in 83% yield (1.51 g, 8.3 mmol).

Alternatively, the title compound was prepared starting from  $N(\text{SiMe}_3)_3$  (304 mg, 1.3 mmol, 1.3 equiv.),  $\text{Yb}_2\text{O}_3$  (394 mg, 1 mmol, 1 equiv.),  $\text{Na}_2\text{CO}_3$  (424 mg, 4 mmol, 4 equiv.),  $\text{NiBr}_2$  (22 mg, 0.1 mmol, 0.1 equiv.),  $\text{PCy}_3$  (83 mg, 0.3 mmol, 0.3 equiv.),  $\text{CF}_3$  substrate **1a** (160 mg, 1 mmol, 1



equiv.) and boronic acid **3a** (163 mg, 1.2 mmol, 1.2 equiv.). The purification was accomplished by column chromatography on silica gel to provide the desired biphenyl **4a** (158 mg, 0.87 mmol, 87%). The gram scale synthesis was performed on 10 mmol of the starting **1a** and the biphenyl **4a** was prepared in 80% yield (1.45 g, 8.0 mmol).

White solid, mp 118 - 119 °C.  $^1\text{H NMR}$  (500 MHz, DMSO- $d_6$ ):  $\delta$  2.33 (s, 6H, 2xMe), 7.24 (d, 4H,  $^3J = 7.2$  Hz,  $\text{CH}_{\text{Ar}}$ ), 7.51 (d, 4H,  $^3J = 8.1$  Hz,  $\text{CH}_{\text{Ar}}$ ).

$^{13}\text{C NMR}$  (126 MHz, DMSO- $d_6$ ):  $\delta$  20.6, 126.2, 129.4, 136.3, 137.2.

MS (GC, 70eV):  $m/z$  (%) = 182 ( $\text{M}^+$ , 100), 167 (68), 152 (14).

Anal. calcd. for  $\text{C}_{14}\text{H}_{14}$ : C 92.26; H, 7.74. Found: C 92.33; H, 7.67.

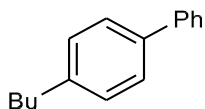

#### **4-butyl-1,1'-biphenyl 4b.**

The title compound was prepared starting from  $\text{N}(\text{SiMe}_3)_3$  (304 mg, 1.3 mmol, 1.3 equiv.),  $\text{Yb}_2\text{O}_3$  (394 mg, 1 mmol, 1 equiv.),  $\text{Na}_2\text{CO}_3$  (424 mg, 4 mmol, 4 equiv.),  $\text{NiBr}_2$  (22 mg, 0.1 mmol, 0.1 equiv.),  $\text{PCy}_3$  (83 mg, 0.3 mmol, 0.3 equiv.),  $\text{CF}_3$  substrate **1q** (146 mg, 1 mmol, 1 equiv.) and boronic acid **3b** (214 mg, 1.2 mmol, 1.2 equiv.). The purification was accomplished by column chromatography on silica gel to provide the desired biphenyl **4b** (155 mg, 0.74 mmol, 74%).

Colorless liquid.  $^1\text{H NMR}$  (500 MHz, DMSO- $d_6$ ):  $\delta$  0.89 (t, 3H,  $^3J = 7.7$  Hz, Me), 1.29 – 1.33 (m, 2H,  $\text{CH}_2$ ), 1.55 – 1.57 (m, 2H,  $\text{CH}_2$ ), 2.59 (t, 2H,  $^3J = 7.8$  Hz,  $\text{CH}_2$ ), 7.25 (d, 2H,  $^3J = 7.3$  Hz,  $\text{CH}_{\text{Ar}}$ ), 7.33 (t, 1H,  $^3J = 7.3$  Hz,  $\text{CH}_{\text{Ar}}$ ), 7.45 (t, 2H,  $^3J = 7.3$  Hz,  $\text{CH}_{\text{Ar}}$ ), 7.55 (d, 2H,  $^3J = 7.8$  Hz,  $\text{CH}_{\text{Ar}}$ ), 7.62 (d, 2H,  $^3J = 7.8$  Hz,  $\text{CH}_{\text{Ar}}$ ).

$^{13}\text{C NMR}$  (126 MHz, DMSO- $d_6$ ):  $\delta$  13.8, 21.8, 33.1, 34.5, 126.4, 126.5, 127.1, 128.8, 137.5, 140.1, 141.6.

Anal. calcd. for  $\text{C}_{14}\text{H}_{14}$ : C 91.37; H, 8.63. Found: C 91.29; H, 8.71.

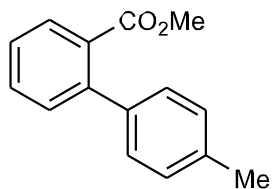

***methyl 4'-methyl-[1,1'-biphenyl]-2-carboxylate 4c.***

The title compound was prepared starting from Na<sub>2</sub>CO<sub>3</sub> (212 mg, 2 mmol, 2 equiv.), NiBr<sub>2</sub> (22 mg, 0.1 mmol, 0.1 equiv.), PCy<sub>3</sub> (83 mg, 0.3 mmol, 0.3 equiv.), nitrile **2p** (166 mg, 1 mmol, 1 equiv.) and boronic acid **3a** (163 mg, 1.2 mmol, 1.2 equiv.). The purification was accomplished by column chromatography on silica gel to provide the desired biphenyl **4c** (165 mg, 0.73 mmol, 73%).

Alternatively, the title compound was prepared starting from N(SiMe<sub>3</sub>)<sub>3</sub> (304 mg, 1.3 mmol, 1.3 equiv.), Yb<sub>2</sub>O<sub>3</sub> (394 mg, 1 mmol, 1 equiv.), Na<sub>2</sub>CO<sub>3</sub> (424 mg, 4 mmol, 4 equiv.), NiBr<sub>2</sub> (22 mg, 0.1 mmol, 0.1 equiv.), PCy<sub>3</sub> (83 mg, 0.3 mmol, 0.3 equiv.), CF<sub>3</sub> substrate **1r** (204 mg, 1 mmol, 1 equiv.) and boronic acid **3a** (163 mg, 1.2 mmol, 1.2 equiv.). The purification was accomplished by column chromatography on silica gel to provide the desired biphenyl **4c** (144 mg, 0.64 mmol, 64%).

Alternatively, title compound was prepared starting from Na<sub>2</sub>CO<sub>3</sub> (212 mg, 2 mmol, 2 equiv.), NiBr<sub>2</sub> (22 mg, 0.1 mmol, 0.1 equiv.), PCy<sub>3</sub> (83 mg, 0.3 mmol, 0.3 equiv.), nitrile **2a** (117 mg, 1 mmol, 1 equiv.) and boronic acid **3c** (216 mg, 1.2 mmol, 1.2 equiv.). The purification was accomplished by column chromatography on silica gel to provide the desired biphenyl **4c** (169 mg, 0.75 mmol, 75%).

Alternatively, the title compound was prepared starting from N(SiMe<sub>3</sub>)<sub>3</sub> (304 mg, 1.3 mmol, 1.3 equiv.), Yb<sub>2</sub>O<sub>3</sub> (394 mg, 1 mmol, 1 equiv.), Na<sub>2</sub>CO<sub>3</sub> (424 mg, 4 mmol, 4 equiv.), NiBr<sub>2</sub> (22 mg, 0.1 mmol, 0.1 equiv.), PCy<sub>3</sub> (83 mg, 0.3 mmol, 0.3 equiv.), CF<sub>3</sub> substrate **1a** (160 mg, 1 mmol, 1 equiv.) and boronic acid **3c** (216 mg, 1.2 mmol, 1.2 equiv.). The purification was accomplished by column chromatography on silica gel to provide the desired biphenyl **4c** (150 mg, 0.65 mmol, 65%).

White solid, mp 60 - 61 °C. **<sup>1</sup>H NMR** (500 MHz, DMSO-*d*<sub>6</sub>): δ 2.34 (s, 3H, Me), 3.59 (s, 3H, OMe), 7.17 (d, 2H, <sup>3</sup>J = 8.1 Hz, CH<sub>Ar</sub>), 7.22 (d, 2H, <sup>3</sup>J = 7.8 Hz, CH<sub>Ar</sub>), 7.40 (d, 1H, <sup>3</sup>J = 7.7 Hz, CH<sub>Ar</sub>), 7.46 (t, 1H, <sup>3</sup>J = 7.5 Hz, CH<sub>Ar</sub>), 7.59 (dd, 1H, <sup>3</sup>J = 7.4 Hz, <sup>4</sup>J = 1.1 Hz, CH<sub>Ar</sub>), 7.70 (d, 1H, <sup>3</sup>J = 7.7 Hz, CH<sub>Ar</sub>).

**<sup>13</sup>C NMR** (126 MHz, DMSO-*d*<sub>6</sub>): δ 20.7, 51.9, 127.2, 128.0, 128.9, 129.1, 130.4, 130.9, 131.4, 136.6, 137.5, 141.0, 168.8.

Anal. calcd. for C<sub>15</sub>H<sub>14</sub>O<sub>2</sub>: C 79.62; H, 6.24. Found: C 79.83; H, 6.11.

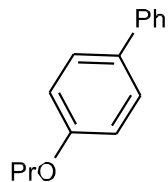

**4-propoxy-1,1'-biphenyl 4d.**

The title compound was prepared starting from  $N(\text{SiMe}_3)_3$  (304 mg, 1.3 mmol, 1.3 equiv.),  $\text{Yb}_2\text{O}_3$  (394 mg, 1 mmol, 1 equiv.),  $\text{Na}_2\text{CO}_3$  (424 mg, 4 mmol, 4 equiv.),  $\text{NiBr}_2$  (22 mg, 0.1 mmol, 0.1 equiv.),  $\text{PCy}_3$  (83 mg, 0.3 mmol, 0.3 equiv.),  $\text{CF}_3$  substrate **1q** (146 mg, 1 mmol, 1 equiv.) and boronic acid **3d** (216 mg, 1.2 mmol, 1.2 equiv.). The purification was accomplished by column chromatography on silica gel to provide the desired biphenyl **4d** (176 mg, 0.83 mmol, 83%).

White solid, mp 76 - 77 °C.  $^1\text{H NMR}$  (500 MHz,  $\text{DMSO-}d_6$ ):  $\delta$  1.04 (t, 3H,  $^3J = 7.7$  Hz, Me), 1.79 – 1.83 (m, 2H,  $\text{CH}_2$ ), 2.98 (t, 2H,  $^3J = 7.5$  Hz,  $\text{OCH}_2$ ), 7.39 – 7.42 (m, 1H,  $\text{CH}_{\text{Ar}}$ ), 7.46 – 7.49 (m, 2H,  $\text{CH}_{\text{Ar}}$ ), 7.62 – 7.64 (m, 2H,  $\text{CH}_{\text{Ar}}$ ), 7.68 (dt, 1H,  $^3J = 8.5$  Hz,  $^4J = 1.8$  Hz,  $\text{CH}_{\text{Ar}}$ ), 8.04 (dt, 1H,  $^3J = 8.5$  Hz,  $^4J = 1.7$  Hz,  $\text{CH}_{\text{Ar}}$ ).

$^{13}\text{C NMR}$  (126 MHz,  $\text{DMSO-}d_6$ ):  $\delta$  13.9, 17.7, 40.5, 127.1, 127.2, 128.1, 128.6, 128.9, 135.7, 139.8, 145.4, 199.9.

Anal. calcd. for  $\text{C}_{15}\text{H}_{16}\text{O}$ : C 84.87; H, 7.60. Found: C 84.96; H, 7.32.

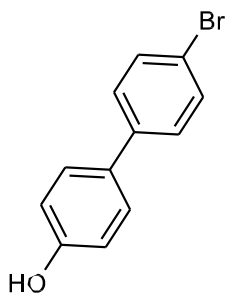

**4'-bromo-[1,1'-biphenyl]-4-ol 4e.**

The title compound was prepared starting from  $N(\text{SiMe}_3)_3$  (304 mg, 1.3 mmol, 1.3 equiv.),  $\text{Yb}_2\text{O}_3$  (394 mg, 1 mmol, 1 equiv.),  $\text{Na}_2\text{CO}_3$  (424 mg, 4 mmol, 4 equiv.),  $\text{NiBr}_2$  (22 mg, 0.1 mmol, 0.1 equiv.),  $\text{PCy}_3$  (83 mg, 0.3 mmol, 0.3 equiv.),  $\text{CF}_3$  substrate **1s** (225 mg, 1 mmol, 1 equiv.) and boronic

acid **3e** (165 mg, 1.2 mmol, 1.2 equiv.). The purification was accomplished by column chromatography on silica gel to provide the desired biphenyl **4e** (193 mg, 0.78 mmol, 78%).

Yellow solid, mp 164 - 166 °C.  $^1\text{H NMR}$  (500 MHz,  $\text{DMSO-}d_6$ ): 6.85 (d, 2H,  $^3J = 7.9$  Hz,  $\text{CH}_{\text{Ar}}$ ), 7.47 (d, 2H,  $^3J = 7.9$  Hz,  $\text{CH}_{\text{Ar}}$ ), 7.51 (d, 2H,  $^3J = 7.6$  Hz,  $\text{CH}_{\text{Ar}}$ ), 7.56 (d, 2H,  $^3J = 8.0$  Hz,  $\text{CH}_{\text{Ar}}$ ).

$^{13}\text{C NMR}$  (126 MHz,  $\text{DMSO-}d_6$ ):  $\delta$  115.8, 119.6, 127.7, 128.0, 129.5, 131.6, 139.4, 157.5.

MS (GC, 70eV):  $m/z$  (%) = 249 (90), 248 ( $\text{M}^+$ , 100), 168 (13), 141 (34), 139 (23).

Anal. calcd. for  $\text{C}_{12}\text{H}_9\text{BrO}$ : C 57.86; H, 3.64. Found: C 58.01; H, 3.59.

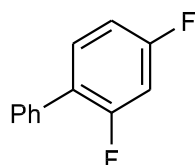

#### **2,4-difluoro-1,1'-biphenyl 4f.**

The title compound was prepared starting from  $\text{N}(\text{SiMe}_3)_3$  (304 mg, 1.3 mmol, 1.3 equiv.),  $\text{Yb}_2\text{O}_3$  (394 mg, 1 mmol, 1 equiv.),  $\text{Na}_2\text{CO}_3$  (424 mg, 4 mmol, 4 equiv.),  $\text{NiBr}_2$  (22 mg, 0.1 mmol, 0.1 equiv.),  $\text{PCy}_3$  (83 mg, 0.3 mmol, 0.3 equiv.),  $\text{CF}_3$  substrate **1p** (182 mg, 1 mmol, 1 equiv.) and boronic acid **3f** (146 mg, 1.2 mmol, 1.2 equiv.). The purification was accomplished by column chromatography on silica gel to provide the desired biphenyl **4f** (167 mg, 0.88 mmol, 88%).

Alternatively, the title compound was prepared starting from  $\text{N}(\text{SiMe}_3)_3$  (304 mg, 1.3 mmol, 1.3 equiv.),  $\text{Yb}_2\text{O}_3$  (394 mg, 1 mmol, 1 equiv.),  $\text{Na}_2\text{CO}_3$  (424 mg, 4 mmol, 4 equiv.),  $\text{NiBr}_2$  (22 mg, 0.1 mmol, 0.1 equiv.),  $\text{PCy}_3$  (83 mg, 0.3 mmol, 0.3 equiv.),  $\text{CF}_3$  substrate **1q** (146 mg, 1 mmol, 1 equiv.) and boronic acid **3g** (190 mg, 1.2 mmol, 1.2 equiv.). The purification was accomplished by column chromatography on silica gel to provide the desired biphenyl **4f** (163 mg, 0.86 mmol, 86%).

White solid, mp 61 - 63 °C.  $^1\text{H NMR}$  (500 MHz,  $\text{CDCl}_3$ ): 6.91 – 6.99 (m, 2H,  $\text{CH}_{\text{Ar}}$ ), 7.37 – 7.42 (m, 2H,  $\text{CH}_{\text{Ar}}$ ), 7.44 – 7.47 (m, 2H,  $\text{CH}_{\text{Ar}}$ ), 7.51 (d, 2H,  $^3J = 7.4$  Hz,  $\text{CH}_{\text{Ar}}$ ).

$^{13}\text{C}$  NMR (126 MHz,  $\text{CDCl}_3$ ):  $\delta$  104.4 (t,  $J_{\text{CF}} = 26.1$  Hz), 111.5 (d,  $J_{\text{CF}} = 21.0$  Hz,  $J_{\text{CF}} = 3.9$  Hz), 125.4 (m), 127.7, 128.5, 128.9, 131.4 (m), 135.0, 159.7 (dd,  $^1J_{\text{CF}} = 250.0$  Hz,  $J_{\text{CF}} = 11.4$  Hz), 162.2 (dd,  $^1J_{\text{CF}} = 249.1$  Hz,  $J_{\text{CF}} = 11.4$  Hz).

HRMS (TOF MS ES+)  $m/z$ :  $[\text{M}]^+$ : Calcd for  $\text{C}_{12}\text{H}_8\text{F}_2$  190.0591. Found 190.0594.

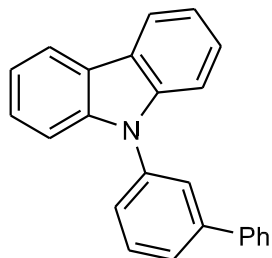

**9-([1,1'-biphenyl]-3-yl)-9H-carbazole **4g**.**

The title compound was prepared starting from  $\text{N}(\text{SiMe}_3)_3$  (304 mg, 1.3 mmol, 1.3 equiv.),  $\text{Yb}_2\text{O}_3$  (394 mg, 1 mmol, 1 equiv.),  $\text{Na}_2\text{CO}_3$  (424 mg, 4 mmol, 4 equiv.),  $\text{NiBr}_2$  (22 mg, 0.1 mmol, 0.1 equiv.),  $\text{PCy}_3$  (83 mg, 0.3 mmol, 0.3 equiv.),  $\text{CF}_3$  substrate **1t** (311 mg, 1 mmol, 1 equiv.) and boronic acid **3f** (146 mg, 1.2 mmol, 1.2 equiv.). The purification was accomplished by column chromatography on silica gel to provide the desired biphenyl **4g** (252 mg, 0.79 mmol, 79%). The gram scale synthesis was performed on 10 mmol of the starting  $\text{CF}_3$  substrate **1t** and the biphenyl **4g** was prepared in 73% yield (2.32 g, 7.3 mmol).

White solid, mp 128 - 129 °C.  $^1\text{H}$  NMR (500 MHz,  $\text{CDCl}_3$ ): 7.33 – 7.36 (t, 2H,  $^3J = 7.7$  Hz,  $\text{CH}_{\text{Ar}}$ ), 7.42 – 7.54 (m, 7H,  $\text{CH}_{\text{Ar}}$ ), 7.58 (d, 1H,  $^3J = 7.3$  Hz,  $\text{CH}_{\text{Ar}}$ ), 7.69 (d, 3H,  $^3J = 8.8$  Hz,  $\text{CH}_{\text{Ar}}$ ), 7.72 – 7.73 (m, 1H,  $\text{CH}_{\text{Ar}}$ ), 7.85 (s, 1H,  $\text{CH}_{\text{Ar}}$ ), 8.21 (d, 2H,  $^3J = 7.7$  Hz,  $\text{CH}_{\text{Ar}}$ ).

$^{13}\text{C}$  NMR (126 MHz,  $\text{CDCl}_3$ ):  $\delta$  109.8, 120.0, 120.3, 123.3, 125.7, 125.8, 126.0, 126.1, 127.1, 127.8, 128.9, 130.2, 138.2, 140.1, 140.8, 143.1.

Anal. calcd. for  $\text{C}_{24}\text{H}_{17}\text{N}$ : C 90.25; H, 5.36; N, 4.39. Found: C 90.33; H, 5.62; N 4.05.

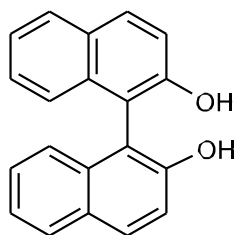

**[1,1'-binaphthalene]-2,2'-diol 4h.**

The title compound was prepared starting from  $N(\text{SiMe}_3)_3$  (304 mg, 1.3 mmol, 1.3 equiv.),  $\text{Yb}_2\text{O}_3$  (394 mg, 1 mmol, 1 equiv.),  $\text{Na}_2\text{CO}_3$  (424 mg, 4 mmol, 4 equiv.),  $\text{NiBr}_2$  (22 mg, 0.1 mmol, 0.1 equiv.),  $\text{PCy}_3$  (83 mg, 0.3 mmol, 0.3 equiv.),  $\text{CF}_3$  substrate **1u** (212 mg, 1 mmol, 1 equiv.) and boronic acid **3h** (226 mg, 1.2 mmol, 1.2 equiv.). The purification was accomplished by column chromatography on silica gel to provide the desired biaryl **4h** (183 mg, 0.64 mmol, 64%).

White solid, mp 205 - 208 °C.  $^1\text{H NMR}$  (500 MHz,  $\text{DMSO}-d_6$ ): 6.98 (d, 2H,  $^3J = 8.6$  Hz,  $\text{CH}_{\text{Ar}}$ ), 7.17 (dt, 2H,  $^3J = 6.9$  Hz,  $^4J = 1.0$  Hz,  $\text{CH}_{\text{Ar}}$ ), 7.24 (dt, 2H,  $^3J = 7.9$  Hz,  $^4J = 1.0$  Hz,  $\text{CH}_{\text{Ar}}$ ), 7.36 (d, 2H,  $^3J = 8.8$  Hz,  $\text{CH}_{\text{Ar}}$ ), 7.87 (t, 4H,  $^3J = 7.4$  Hz,  $\text{CH}_{\text{Ar}}$ ), 9.26 (s, 2H, 2xOH).

$^{13}\text{C NMR}$  (126 MHz,  $\text{DMSO}-d_6$ ):  $\delta$  115.5, 118.6, 122.3, 124.5, 125.9, 127.9, 128.1, 128.7, 134.2, 153.1.

Anal. calcd. for  $\text{C}_{20}\text{H}_{14}\text{O}_2$ : C 83.90; H, 4.93. Found: C 83.97; H, 5.03.

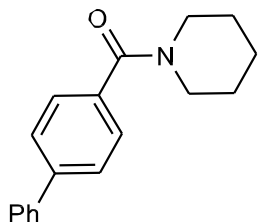

**[1,1'-biphenyl]-4-yl(piperidin-1-yl)methanone 4i.**

The title compound was prepared starting from  $\text{Na}_2\text{CO}_3$  (212 mg, 2 mmol, 2 equiv.),  $\text{NiBr}_2$  (22 mg, 0.1 mmol, 0.1 equiv.),  $\text{PCy}_3$  (83 mg, 0.3 mmol, 0.3 equiv.), nitrile **2q** (214 mg, 1 mmol, 1 equiv.) and boronic acid **3f** (146 mg, 1.2 mmol, 1.2 equiv.). The purification was accomplished by column chromatography on silica gel to provide the desired biphenyl **4i** (235 mg, 0.89 mmol, 89%).

Alternatively, the title compound was prepared starting from  $N(\text{SiMe}_3)_3$  (304 mg, 1.3 mmol, 1.3 equiv.),  $\text{Yb}_2\text{O}_3$  (394 mg, 1 mmol, 1 equiv.),  $\text{Na}_2\text{CO}_3$  (424 mg, 4 mmol, 4 equiv.),  $\text{NiBr}_2$  (22 mg, 0.1 mmol, 0.1 equiv.),  $\text{PCy}_3$  (83 mg, 0.3 mmol, 0.3 equiv.),  $\text{CF}_3$  substrate **1v** (257 mg, 1 mmol, 1 equiv.) and boronic acid **3f** (146 mg, 1.2 mmol, 1.2 equiv.). The purification was accomplished by column chromatography on silica gel to provide the desired biphenyl **4i** (220 mg, 0.83 mmol, 83%).

White solid, mp 98 - 99 °C.  $^1\text{H NMR}$  (500 MHz,  $\text{CDCl}_3$ ): 1.61 – 1.69 (m, 6H, Piperidine), 3.40 – 3.70 (m, 4H, Piperidine), 7.37 (t, 1H,  $^3J = 7.3$  Hz,  $\text{CH}_{\text{Ar}}$ ), 7.44 (d, 2H,  $^3J = 7.6$  Hz,  $\text{CH}_{\text{Ar}}$ ), 7.47 (d, 2H,  $^3J = 7.3$  Hz,  $\text{CH}_{\text{Ar}}$ ), 7.59 (d, 2H,  $^3J = 7.3$  Hz,  $\text{CH}_{\text{Ar}}$ ), 7.61 (d, 2H,  $^3J = 7.9$  Hz,  $\text{CH}_{\text{Ar}}$ ).

$^{13}\text{C NMR}$  (126 MHz,  $\text{CDCl}_3$ ):  $\delta$  24.6, 127.1, 127.4, 127.6, 128.8, 135.2, 140.3, 142.2, 170.1.

HRMS (TOF MS ES+)  $m/z$ :  $[\text{M} + \text{H}]^+$ : Calcd for  $\text{C}_{18}\text{H}_{19}\text{NO}$  266.1550. Found 266.1545.

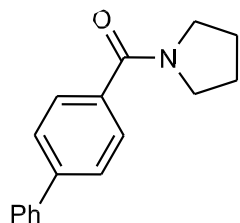

**[1,1'-biphenyl]-4-yl(pyrrolidin-1-yl)methanone 4j.**

The title compound was prepared starting from  $\text{N}(\text{SiMe}_3)_3$  (304 mg, 1.3 mmol, 1.3 equiv.),  $\text{Yb}_2\text{O}_3$  (394 mg, 1 mmol, 1 equiv.),  $\text{Na}_2\text{CO}_3$  (424 mg, 4 mmol, 4 equiv.),  $\text{NiBr}_2$  (22 mg, 0.1 mmol, 0.1 equiv.),  $\text{PCy}_3$  (83 mg, 0.3 mmol, 0.3 equiv.),  $\text{CF}_3$  substrate **1w** (243 mg, 1 mmol, 1 equiv.) and boronic acid **3f** (146 mg, 1.2 mmol, 1.2 equiv.). The purification was accomplished by column chromatography on silica gel to provide the desired biphenyl **4j** (213 mg, 0.85 mmol, 85%). The gram scale synthesis was performed on 10 mmol of the starting **1x** and the biphenyl **4j** was prepared in 80% yield (2.01 g, 8.0 mmol).

White solid, mp 139 – 140 °C.  $^1\text{H NMR}$  (500 MHz,  $\text{DMSO}-d_6$ ): 1.78 – 1.82 (m, 2H, Pyrrolidine), 1.83 – 1.87 (m, 2H, Pyrrolidine), 3.42 (t, 2H,  $^3J = 6.4$  Hz, Pyrrolidin), 3.48 (t, 2H,  $^3J = 6.8$  Hz, Pyrrolidine), 7.39 (t, 1H,  $^3J = 7.2$  Hz,  $\text{CH}_{\text{Ar}}$ ), 7.48 (d, 2H,  $^3J = 7.8$  Hz,  $\text{CH}_{\text{Ar}}$ ), 7.60 (d, 2H,  $^3J = 8.1$  Hz,  $\text{CH}_{\text{Ar}}$ ), 7.70 (t, 4H,  $^3J = 7.5$  Hz,  $\text{CH}_{\text{Ar}}$ ).

$^{13}\text{C NMR}$  (126 MHz,  $\text{DMSO}-d_6$ ):  $\delta$  23.9, 26.0, 46.0, 48.9, 126.4, 126.8, 127.8, 127.9, 129.0, 136.1, 139.3, 141.3.

MS (GC, 70eV):  $m/z$  (%) = 251 ( $\text{M}^+$ , 46), 181 (100), 152 (57.5).

Anal. calcd. for  $\text{C}_{17}\text{H}_{17}\text{NO}$ : C 81.24; H, 6.82. Found: C 82.52; H, 6.76.

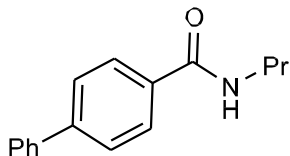

***N*-propyl-[1,1'-biphenyl]-4-carboxamide 4k.**

The title compound was prepared starting from  $\text{N}(\text{SiMe}_3)_3$  (304 mg, 1.3 mmol, 1.3 equiv.),  $\text{Yb}_2\text{O}_3$  (394 mg, 1 mmol, 1 equiv.),  $\text{Na}_2\text{CO}_3$  (424 mg, 4 mmol, 4 equiv.),  $\text{NiBr}_2$  (22 mg, 0.1 mmol, 0.1 equiv.),  $\text{PCy}_3$  (83 mg, 0.3 mmol, 0.3 equiv.),  $\text{CF}_3$  substrate **1x** (231 mg, 1 mmol, 1 equiv.) and boronic acid **3f** (146 mg, 1.2 mmol, 1.2 equiv.). The purification was accomplished by column chromatography on silica gel to provide the desired biphenyl **4k** (193 mg, 0.81 mmol, 81%).

White solid, mp 160 - 161 °C.  $^1\text{H NMR}$  (500 MHz,  $\text{DMSO-}d_6$ ): 0.90 (t, 3H,  $\text{CH}_3$ ), 1.53 – 1.58 (m, 2H,  $\text{CH}_2$ ), 3.25 (q, 2H,  $^3J = 6.6$  Hz,  $\text{CH}_2\text{N}$ ), 7.40 (t, 1H,  $^3J = 7.2$  Hz,  $\text{CH}_{\text{Ar}}$ ), 7.48 (t, 2H,  $^3J = 7.7$  Hz,  $\text{CH}_{\text{Ar}}$ ), 7.71 – 7.73 (m, 2H,  $\text{CH}_{\text{Ar}}$ ), 7.75 (d, 2H,  $^3J = 8.4$  Hz,  $\text{CH}_{\text{Ar}}$ ), 7.95 (d, 2H,  $^3J = 8.2$  Hz,  $\text{CH}_{\text{Ar}}$ ).

$^{13}\text{C NMR}$  (126 MHz,  $\text{DMSO-}d_6$ ):  $\delta$  11.5, 22.5, 41.0, 126.5, 126.9, 127.8, 128.0, 129.0, 133.5, 139.2, 142.5, 165.8.

MS (GC, 70eV):  $m/z$  (%) = 239 ( $\text{M}^+$ , 36), 197 (19), 181 (100), 152 (44).

Anal. calcd. for  $\text{C}_{16}\text{H}_{17}\text{NO}$ : C 80.30; H, 7.16; N, 5.85. Found: C 80.36; H, 7.23; N, 5.91.

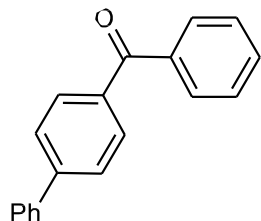

***[1,1'-biphenyl]-4-yl(phenyl)methanone 4l.***

The title compound was prepared starting from  $\text{N}(\text{SiMe}_3)_3$  (304 mg, 1.3 mmol, 1.3 equiv.),  $\text{Yb}_2\text{O}_3$  (394 mg, 1 mmol, 1 equiv.),  $\text{Na}_2\text{CO}_3$  (424 mg, 4 mmol, 4 equiv.),  $\text{NiBr}_2$  (22 mg, 0.1 mmol, 0.1 equiv.),  $\text{PCy}_3$  (83 mg, 0.3 mmol, 0.3 equiv.),  $\text{CF}_3$  substrate **1y** (250 mg, 1 mmol, 1 equiv.) and boronic acid **3f** (146 mg, 1.2 mmol, 1.2 equiv.). The purification was accomplished by column chromatography on silica gel to provide the desired biphenyl **4l** (211 mg, 0.82 mmol, 82%).



White solid, mp 99 - 101 °C.  $^1\text{H NMR}$  (500 MHz,  $\text{DMSO-}d_6$ ):  $\delta$  7.43 (t, 1H,  $^3J = 7.4$  Hz,  $\text{CH}_{\text{Ar}}$ ), 7.51 (t, 2H,  $^3J = 7.8$  Hz,  $\text{CH}_{\text{Ar}}$ ), 7.57 (t, 2H,  $^3J = 8.1$  Hz,  $\text{CH}_{\text{Ar}}$ ), 7.70 (t, 2H,  $^3J = 7.5$  Hz,  $\text{CH}_{\text{Ar}}$ ), 7.67 – 7.70 (m, 1H,  $\text{CH}_{\text{Ar}}$ ), 7.76 (t, 4H,  $^3J = 7.6$  Hz,  $\text{CH}_{\text{Ar}}$ ), 7.84 (q, 4H,  $^3J = 6.0$  Hz,  $\text{CH}_{\text{Ar}}$ ).

$^{13}\text{C NMR}$  (126 MHz,  $\text{DMSO-}d_6$ ):  $\delta$  126.8, 127.0, 128.4, 128.6, 129.1, 129.6, 130.5, 132.6, 135.7, 137.2, 138.9, 144.2, 195.3.

MS (GC, 70eV):  $m/z$  (%) = 258 ( $\text{M}^+$ , 52), 181 (100), 152 (50).

Anal. calcd. for  $\text{C}_{19}\text{H}_{14}\text{O}$ : C 88.34; H, 5.46. Found: C 88.41; H, 5.55.

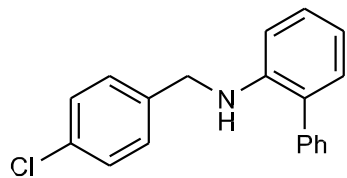

***N*-(4-chlorobenzyl)-[1,1'-biphenyl]-2-amine **4m**.**

The title compound was prepared starting from  $\text{N}(\text{SiMe}_3)_3$  (304 mg, 1.3 mmol, 1.3 equiv.),  $\text{Yb}_2\text{O}_3$  (394 mg, 1 mmol, 1 equiv.),  $\text{Na}_2\text{CO}_3$  (424 mg, 4 mmol, 4 equiv.),  $\text{NiBr}_2$  (22 mg, 0.1 mmol, 0.1 equiv.),  $\text{PCy}_3$  (83 mg, 0.3 mmol, 0.3 equiv.),  $\text{CF}_3$  substrate **1z** (286 mg, 1 mmol, 1 equiv.) and boronic acid **3f** (146 mg, 1.2 mmol, 1.2 equiv.). The purification was accomplished by column chromatography on silica gel to provide the desired biphenyl **4m** (231 mg, 0.79 mmol, 79%).

Yellowish solid, mp 154 - 155 °C.  $^1\text{H NMR}$  (500 MHz,  $\text{CDCl}_3$ ): 4.33 (s, 2H,  $\text{CH}_2$ ), 4.47 (br. s, 1H, NH), 6.63 (d, 1H,  $^3J = 8.0$  Hz,  $\text{CH}_{\text{Ar}}$ ), 6.84 (t, 1H,  $^3J = 7.2$  Hz,  $\text{CH}_{\text{Ar}}$ ), 7.17 (d, 1H,  $^3J = 7.3$  Hz,  $\text{CH}_{\text{Ar}}$ ), 7.22 (t, 1H,  $^3J = 7.0$  Hz,  $\text{CH}_{\text{Ar}}$ ), 7.28 (d, 2H,  $^3J = 8.3$  Hz,  $\text{CH}_{\text{Ar}}$ ), 7.32 (d, 2H,  $^3J = 8.5$  Hz,  $\text{CH}_{\text{Ar}}$ ), 7.36 – 7.42 (m, 1H,  $\text{CH}_{\text{Ar}}$ ), 7.49 – 7.53 (m, 4H,  $\text{CH}_{\text{Ar}}$ ).

$^{13}\text{C NMR}$  (126 MHz,  $\text{CDCl}_3$ ):  $\delta$  47.4, 110.7, 117.4, 127.3, 127.7, 128.3, 128.7, 129.0, 129.3, 130.2, 132.6, 138.0, 139.3, 144.5.

Anal. calcd. for  $\text{C}_{19}\text{H}_{16}\text{NCl}$ : C 77.68; H, 5.49; N, 4.77. Found: C 77.62; H, 5.29; N, 4.71.

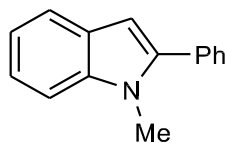

### **1-methyl-2-phenyl-1H-indole 4n.**

The title compound was prepared starting from  $N(\text{SiMe}_3)_3$  (304 mg, 1.3 mmol, 1.3 equiv.),  $\text{Yb}_2\text{O}_3$  (394 mg, 1 mmol, 1 equiv.),  $\text{Na}_2\text{CO}_3$  (424 mg, 4 mmol, 4 equiv.),  $\text{NiBr}_2$  (22 mg, 0.1 mmol, 0.1 equiv.),  $\text{PCy}_3$  (83 mg, 0.3 mmol, 0.3 equiv.),  $\text{CF}_3$  substrate **1aa** (199 mg, 1 mmol, 1 equiv.) and boronic acid **3f** (146 mg, 1.2 mmol, 1.2 equiv.). The purification was accomplished by column chromatography on silica gel to provide the desired phenylindole **4n** (149 mg, 0.72 mmol, 72%).

Yellowish solid, mp 102 - 103 °C.  $^1\text{H NMR}$  (500 MHz,  $\text{DMSO-}d_6$ ):  $\delta$  3.04 (s, 3H, Me), 6.73 (s, 1H,  $\text{CH}_{\text{indole}}$ ), 7.31 (dt, 1H,  $^3J = 7.1$  Hz,  $^4J = 0.8$  Hz,  $\text{CH}_{\text{Ar}}$ ), 7.40 (dt, 1H,  $^3J = 7.3$  Hz,  $^4J = 0.8$  Hz,  $\text{CH}_{\text{Ar}}$ ), 7.49 (d, 1H,  $^3J = 8.2$  Hz,  $\text{CH}_{\text{Ar}}$ ), 7.51 – 7.54 (m, 1H,  $\text{CH}_{\text{Ar}}$ ), 7.59 (t, 2H,  $^3J = 8.0$  Hz,  $\text{CH}_{\text{Ar}}$ ), 7.64 – 7.66 (m, 2H,  $\text{CH}_{\text{Ar}}$ ), 7.80 (d, 1H,  $^3J = 7.8$  Hz,  $\text{CH}_{\text{Ar}}$ ).

$^{13}\text{C NMR}$  (126 MHz,  $\text{DMSO-}d_6$ ):  $\delta$  31.1, 101.6, 109.6, 119.8, 120.4, 121.6, 127.8, 127.9, 128.4, 129.3, 132.8, 138.3, 141.5.

HRMS (TOF MS ES+)  $m/z$ :  $[\text{M} + \text{H}]^+$ : Calcd for  $\text{C}_{15}\text{H}_{14}\text{N}$  208.1131. Found 208.1126.

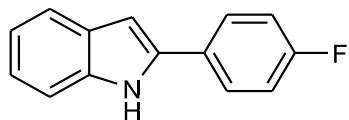

### **2-(4-fluorophenyl)-1H-indole 4o.**

The title compound was prepared starting from  $N(\text{SiMe}_3)_3$  (304 mg, 1.3 mmol, 1.3 equiv.),  $\text{Yb}_2\text{O}_3$  (394 mg, 1 mmol, 1 equiv.),  $\text{Na}_2\text{CO}_3$  (424 mg, 4 mmol, 4 equiv.),  $\text{NiBr}_2$  (22 mg, 0.1 mmol, 0.1 equiv.),  $\text{PCy}_3$  (83 mg, 0.3 mmol, 0.3 equiv.),  $\text{CF}_3$  substrate **1ab** (185 mg, 1 mmol, 1 equiv.) and boronic acid **3i** (168 mg, 1.2 mmol, 1.2 equiv.). The purification was accomplished by column chromatography on silica gel to provide the desired phenylindole **4o** (158 mg, 0.75 mmol, 75%).

Yellowish solid, mp 190 - 192 °C.  $^1\text{H NMR}$  (500 MHz,  $\text{DMSO-}d_6$ ):  $\delta$  6.85 (s, 1H,  $\text{CH}_{\text{indole}}$ ), 7.01 (t, 1H,  $^3J = 7.4$  Hz,  $\text{CH}_{\text{Ar}}$ ), 7.11 (t, 1H,  $^3J = 7.3$  Hz,  $\text{CH}_{\text{Ar}}$ ), 7.31 (t, 2H,  $^3J = 8.6$  Hz,  $\text{CH}_{\text{Ar}}$ ), 7.42 (d, 1H,  $^3J = 8.0$  Hz,  $\text{CH}_{\text{Ar}}$ ), 7.53 (d, 1H,  $^3J = 8.0$  Hz,  $\text{CH}_{\text{Ar}}$ ), 7.89 – 7.92 (m, 2H,  $\text{CH}_{\text{Ar}}$ ), 11.6 (s, 1H, NH).

$^{13}\text{C NMR}$  (126 MHz,  $\text{DMSO-}d_6$ ):  $\delta$  98.7, 111.3, 115.8 (d,  $J_{\text{CF}} = 21.5$  Hz), 119.4, 120.1, 121.6, 127.0 (d,  $J_{\text{CF}} = 7.9$  Hz), 128.7, 128.9 (d,  $J_{\text{CF}} = 3.0$  Hz), 137.0 (d,  $J_{\text{CF}} = 49.8$  Hz), 161.6 (d,  $^1J_{\text{CF}} = 247.4$  Hz).

HRMS (TOF MS ES+)  $m/z$ :  $[\text{M} + \text{H}]^+$ : Calcd for  $\text{C}_{14}\text{H}_{11}\text{NF}$  212.0878. Found 212.0876.

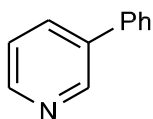

### **3-phenylpyridine 4p.**

The title compound was prepared starting from  $N(\text{SiMe}_3)_3$  (304 mg, 1.3 mmol, 1.3 equiv.),  $\text{Yb}_2\text{O}_3$  (394 mg, 1 mmol, 1 equiv.),  $\text{Na}_2\text{CO}_3$  (424 mg, 4 mmol, 4 equiv.),  $\text{NiBr}_2$  (22 mg, 0.1 mmol, 0.1 equiv.),  $\text{PCy}_3$  (83 mg, 0.3 mmol, 0.3 equiv.),  $\text{CF}_3$  substrate **1q** (146 mg, 1 mmol, 1 equiv.) and boronic acid **3j** (147 mg, 1.2 mmol, 1.2 equiv.). The purification was accomplished by column chromatography on silica gel to provide the desired phenylpyridine **4p** (116 mg, 0.75 mmol, 75%).

Alternatively, the title compound was prepared starting from  $N(\text{SiMe}_3)_3$  (304 mg, 1.3 mmol, 1.3 equiv.),  $\text{Yb}_2\text{O}_3$  (394 mg, 1 mmol, 1 equiv.),  $\text{Na}_2\text{CO}_3$  (424 mg, 4 mmol, 4 equiv.),  $\text{NiBr}_2$  (22 mg, 0.1 mmol, 0.1 equiv.),  $\text{PCy}_3$  (83 mg, 0.3 mmol, 0.3 equiv.),  $\text{CF}_3$  substrate **1ac** (147 mg, 1 mmol, 1 equiv.) and boronic acid **3f** (146 mg, 1.2 mmol, 1.2 equiv.). The purification was accomplished by column chromatography on silica gel to provide the desired phenylpyridine **4p** (119 mg, 0.77 mmol, 77%).

Yellow solid.  $^1\text{H NMR}$  (500 MHz,  $\text{DMSO}-d_6$ ):  $\delta$  7.28 – 7.31 (m, 1H,  $\text{CH}_{\text{Ar}}$ ), 7.35 – 7.38 (m, 1H,  $\text{CH}_{\text{Ar}}$ ), 7.43 (t, 2H,  $^3J = 7.8$  Hz,  $\text{CH}_{\text{Ar}}$ ), 7.53 (d, 2H,  $^3J = 8.6$  Hz,  $\text{CH}_{\text{Ar}}$ ), 7.42 (d, 1H,  $^3J = 8.4$  Hz,  $\text{CH}_{\text{Ar}}$ ), 8.56 (dd, 1H,  $^3J = 4.8$  Hz,  $^4J = 1.3$  Hz,  $\text{CH}_{\text{Ar}}$ ), 8.83 (d, 1H,  $^4J = 2.2$  Hz,  $\text{CH}_{\text{Ar}}$ ).

$^{13}\text{C NMR}$  (126 MHz,  $\text{CDCl}_3$ ):  $\delta$  123.3, 126.9, 127.9, 128.8, 134.1, 136.3, 137.6, 148.1, 148.2.

HRMS (TOF MS ES+)  $m/z$ :  $[\text{M} + \text{H}]^+$ : Calcd for  $\text{C}_{11}\text{H}_{10}\text{N}$  156.0816. Found 156.0813.

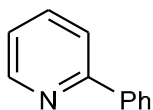

### **2-phenylpyridine 4q.**

The title compound was prepared starting from  $N(\text{SiMe}_3)_3$  (304 mg, 1.3 mmol, 1.3 equiv.),  $\text{Yb}_2\text{O}_3$  (394 mg, 1 mmol, 1 equiv.),  $\text{Na}_2\text{CO}_3$  (424 mg, 4 mmol, 4 equiv.),  $\text{NiBr}_2$  (22 mg, 0.1 mmol, 0.1 equiv.),  $\text{PCy}_3$  (83 mg, 0.3 mmol, 0.3 equiv.),  $\text{CF}_3$  substrate **1ad** (147 mg, 1 mmol, 1 equiv.) and boronic

acid **3f** (146 mg, 1.2 mmol, 1.2 equiv.). The purification was accomplished by column chromatography on silica gel to provide the desired phenylpyridine **4p** (104 mg, 0.67 mmol, 67%).

Yellowish solid.  $^1\text{H NMR}$  (500 MHz, DMSO- $d_6$ ):  $\delta$  7.15 – 7.18 (m, 1H, CH<sub>Ar</sub>), 7.41 (t, 1H,  $^3J = 7.5$  Hz, CH<sub>Ar</sub>), 7.47 (t, 2H,  $^3J = 7.8$  Hz, CH<sub>Ar</sub>), 7.66 – 7.68 (m, 2H, CH<sub>Ar</sub>), 8.00 – 8.02 (m, 2H, CH<sub>Ar</sub>), 8.69 (d, 1H,  $^3J = 4.8$  Hz, CH<sub>Ar</sub>).

$^{13}\text{C NMR}$  (126 MHz, CDCl<sub>3</sub>):  $\delta$  120.3, 121.9, 126.7, 128.5, 128.8, 136.5, 139.2, 149.4, 157.2.

HRMS (TOF MS ES+)  $m/z$ : [M + H]<sup>+</sup>: Calcd for C<sub>11</sub>H<sub>10</sub>N 156.0816. Found 156.0813.

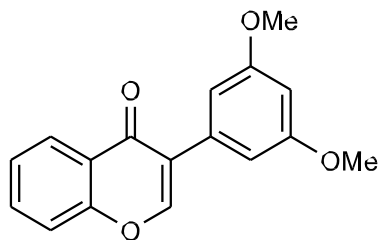

**3-(3,5-dimethoxyphenyl)-4H-chromen-4-one 4r.**

The title compound was prepared starting from N(SiMe<sub>3</sub>)<sub>3</sub> (304 mg, 1.3 mmol, 1.3 equiv.), Yb<sub>2</sub>O<sub>3</sub> (394 mg, 1 mmol, 1 equiv.), Na<sub>2</sub>CO<sub>3</sub> (424 mg, 4 mmol, 4 equiv.), NiBr<sub>2</sub> (22 mg, 0.1 mmol, 0.1 equiv.), PCy<sub>3</sub> (83 mg, 0.3 mmol, 0.3 equiv.), CF<sub>3</sub> substrate **1ae** (214 mg, 1 mmol, 1 equiv.) and boronic acid **3k** (218 mg, 1.2 mmol, 1.2 equiv.). The purification was accomplished by column chromatography on silica gel to provide the desired 3-arylchromone **4r** (206 mg, 0.73 mmol, 73%).

Yellow solid, mp 140 - 142 °C.  $^1\text{H NMR}$  (500 MHz, DMSO- $d_6$ ):  $\delta$  3.81 (s, 6H, 2xOMe), 6.48 (t, 1H,  $J = 2.4$  Hz, CH<sub>Ar</sub>), 6.72 (d, 2H,  $J = 2.4$  Hz, CH<sub>Ar</sub>), 7.42 (t, 1H,  $^3J = 7.5$  Hz, CH<sub>Ar</sub>), 7.47 (d, 1H,  $^3J = 8.3$  Hz, CH<sub>Ar</sub>), 7.66 – 7.68 (m, 2H, CH<sub>Ar</sub>), 8.03 (s, 1H, CH<sub>Ar</sub>), 8.30 (dd, 1H,  $^3J = 7.9$  Hz,  $^4J = 1.8$  Hz, CH<sub>Ar</sub>).

$^{13}\text{C NMR}$  (126 MHz, CDCl<sub>3</sub>):  $\delta$  55.4, 100.5, 107.0, 124.5, 125.2, 125.2, 126.3, 133.6, 153.2, 156.0, 160.7, 176.1.

HRMS (TOF MS ES+)  $m/z$ : [M + H]<sup>+</sup>: Calcd for C<sub>17</sub>H<sub>15</sub>O<sub>4</sub> 283.0970. Found 283.0979.

**(C) Copies  $^1\text{H}$  and  $^{13}\text{C}$  NMR spectra.**

# Compound 2a

SpinWorks 4: IVA 2193 1H CDCl3

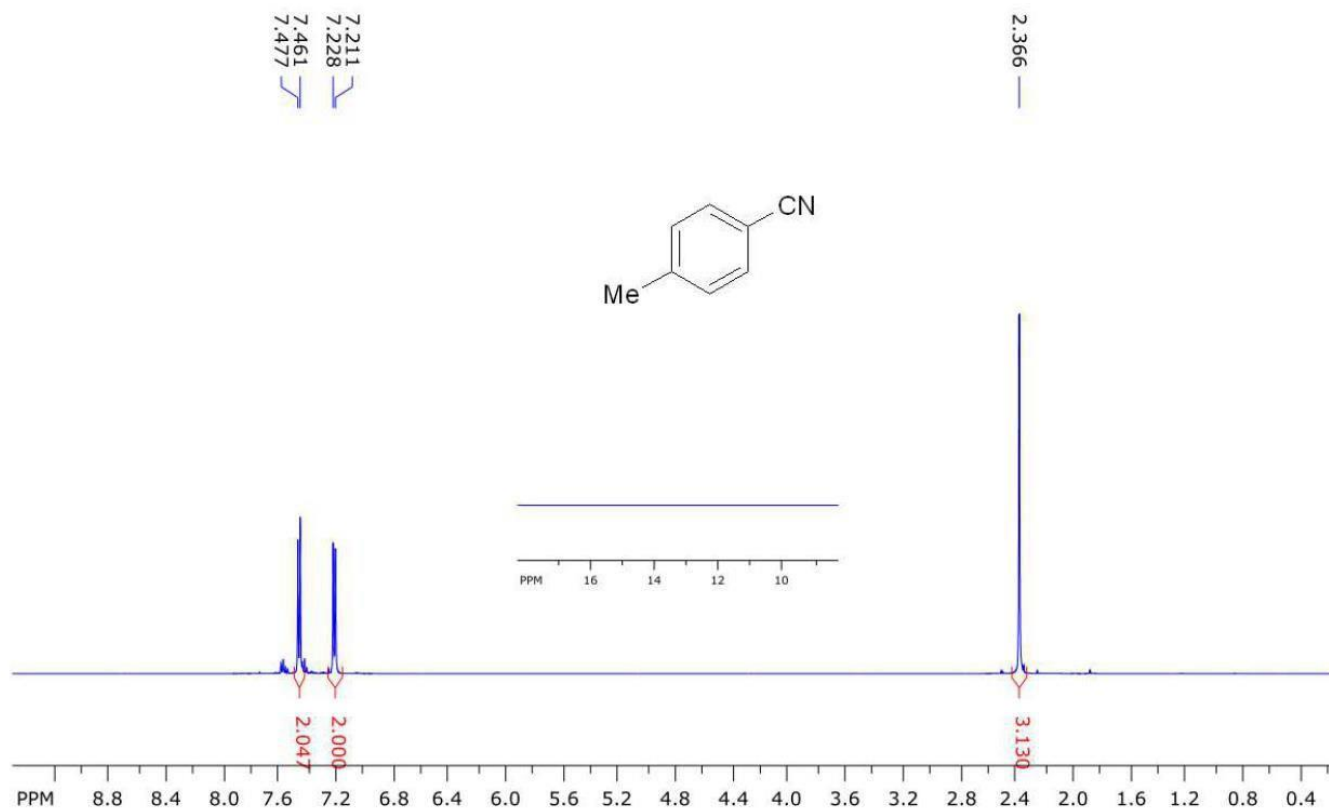

file: D:\NAPO\NMR\500-2\mkr10304\19\fid expt: <zg30>  
transmitter freq.: 500.133001 MHz  
time domain size: 65536 points  
width: 12335.53 Hz = 24.6645 ppm = 0.188225 Hz/pt  
number of scans: 24

freq. of 0 ppm: 500.130023 MHz  
processed size: 65536 complex points  
LB: 0.300 GF: 0.0000  
Hz/cm: 187.216 ppm/cm: 0.37433

# Compound 2a

SpinWorks 4: IVA 2193 1H CDCL3

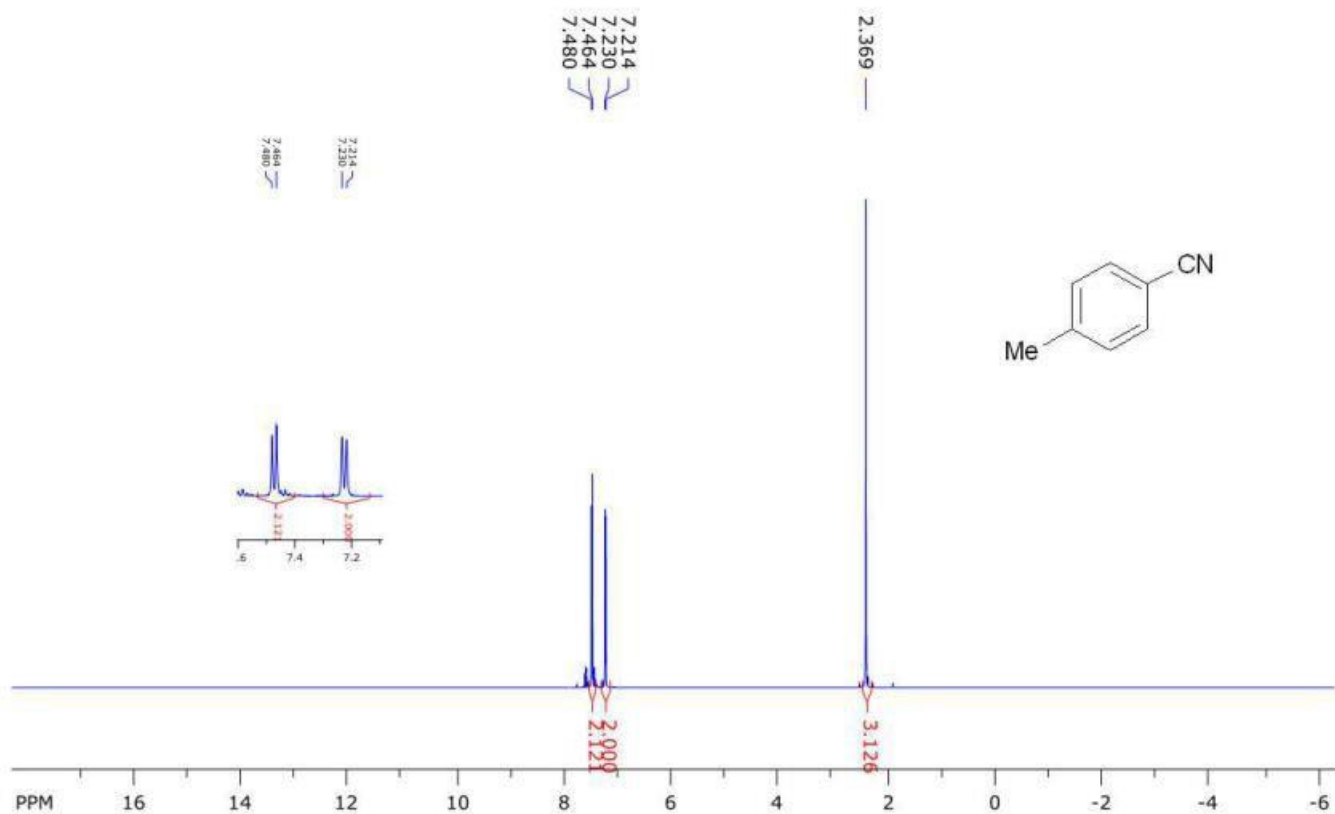

file: D:\NAPO\NMR\500-2\mkr10304\19\fid expt: <zg30>  
 transmitter freq.: 500.133001 MHz  
 time domain size: 65536 points  
 width: 12335.53 Hz = 24.6645 ppm = 0.188225 Hz/pt  
 number of scans: 24

freq. of 0 ppm: 500.130021 MHz  
 processed size: 65536 complex points  
 LB: 0.300 GF: 0.0000  
 Hz/cm: 493.421 ppm/cm: 0.98658

# Compound 2b

SpinWorks 4: SVS 4 1H CDCI3

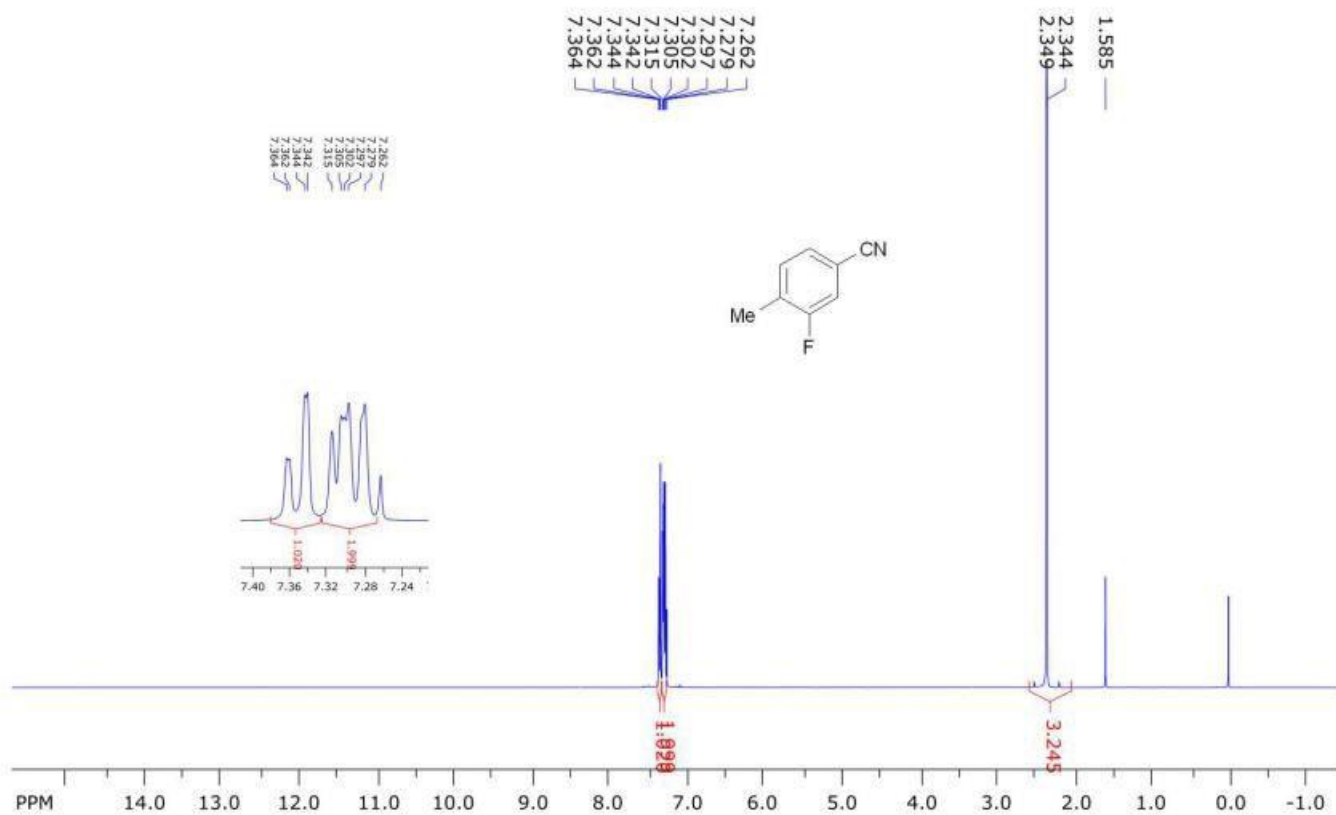

file: ...:\NAPO\NMR\JELA\nmr\jn-SVS-4\1\fid expt: <zg30>  
 transmitter freq.: 400.132471 MHz  
 time domain size: 65536 points  
 width: 8196.72 Hz = 20.4850 ppm = 0.125072 Hz/pt  
 number of scans: 16

freq. of 0 ppm: 400.130008 MHz  
 processed size: 65536 complex points  
 LB: 0.300 GF: 0.0000  
 Hz/cm: 274.554 ppm/cm: 0.68616



Compound **2b**

SpinWorks 4: SVS 4 13C CDCL3

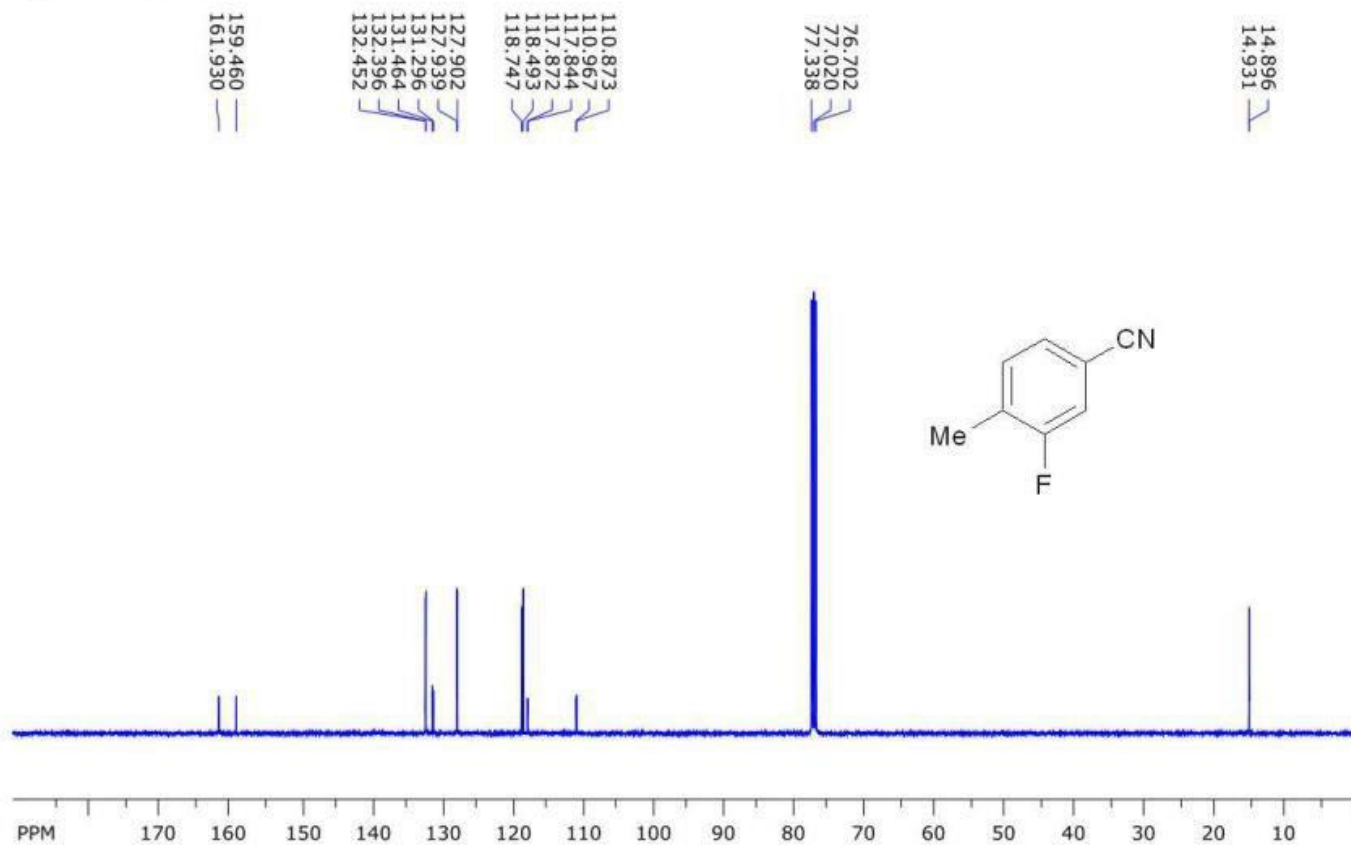

file: D:\NAPO\NMR\JELA\jn-SVS-4\2\fid expt: <zpgg30>  
 transmitter freq.: 100.622830 MHz  
 time domain size: 65536 points  
 width: 23809.52 Hz = 236.6215 ppm = 0.363305 Hz/pt  
 number of scans: 3700

freq. of 0 ppm: 100.612770 MHz  
 processed size: 32768 complex points  
 LB: 1.000 GF: 0.0000  
 Hz/cm: 770.122 ppm/cm: 7.65355

# Compound 2c

SpinWorks 4: SVS 37 1H CDCl3

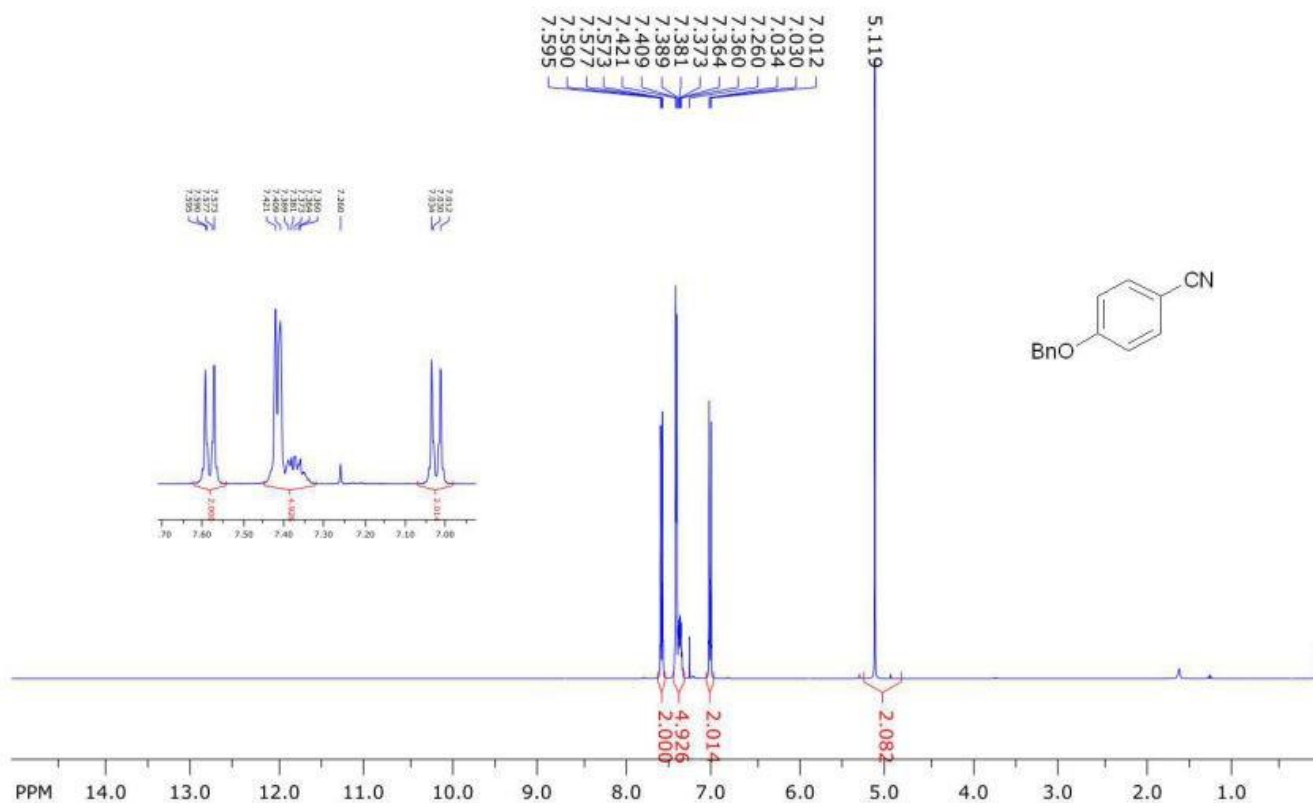

file: ...\\NAPO\\NMR\\JELA\\nmr\\jn-SVS-37\\1\\fid exp: <zg30>  
 transmitter freq.: 400.132471 MHz  
 time domain size: 65536 points  
 width: 8196.72 Hz = 20.4850 ppm = 0.125072 Hz/pt  
 number of scans: 16

freq. of 0 ppm: 400.130009 MHz  
 processed size: 65536 complex points  
 LB: 0.300 GF: 0.0000  
 Hz/cm: 242.275 ppm/cm: 0.60549

Compound 2c

SpinWorks 4: SVS 13C CDCl3

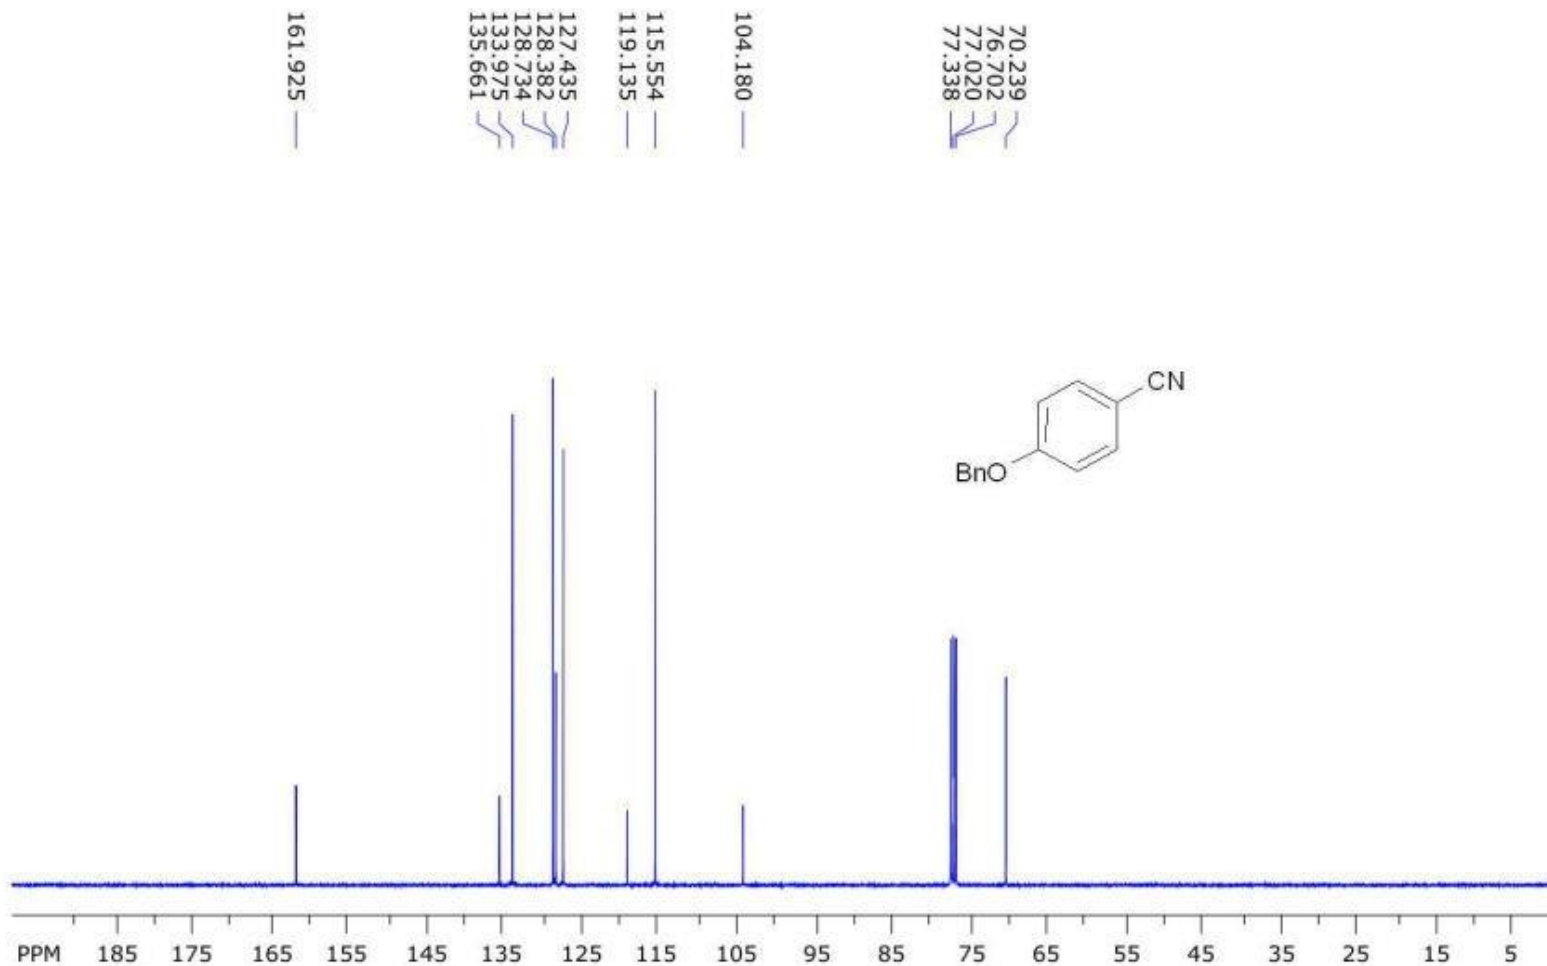

file: D:\NAPO\NMR\JELA\jn-SVS-37\2\fid expt: <zgpg30>  
 transmitter freq.: 100.622830 MHz  
 time domain size: 65536 points  
 width: 23809.52 Hz = 236.6215 ppm = 0.363305 Hz/pt  
 number of scans: 2215

freq. of 0 ppm: 100.612774 MHz  
 processed size: 32768 complex points  
 LB: 1.000 GF: 0.0000  
 Hz/cm: 801.728 ppm/cm: 7.96765

# Compound 2d

SpinWorks 4: SVS 39 1H CDCL3

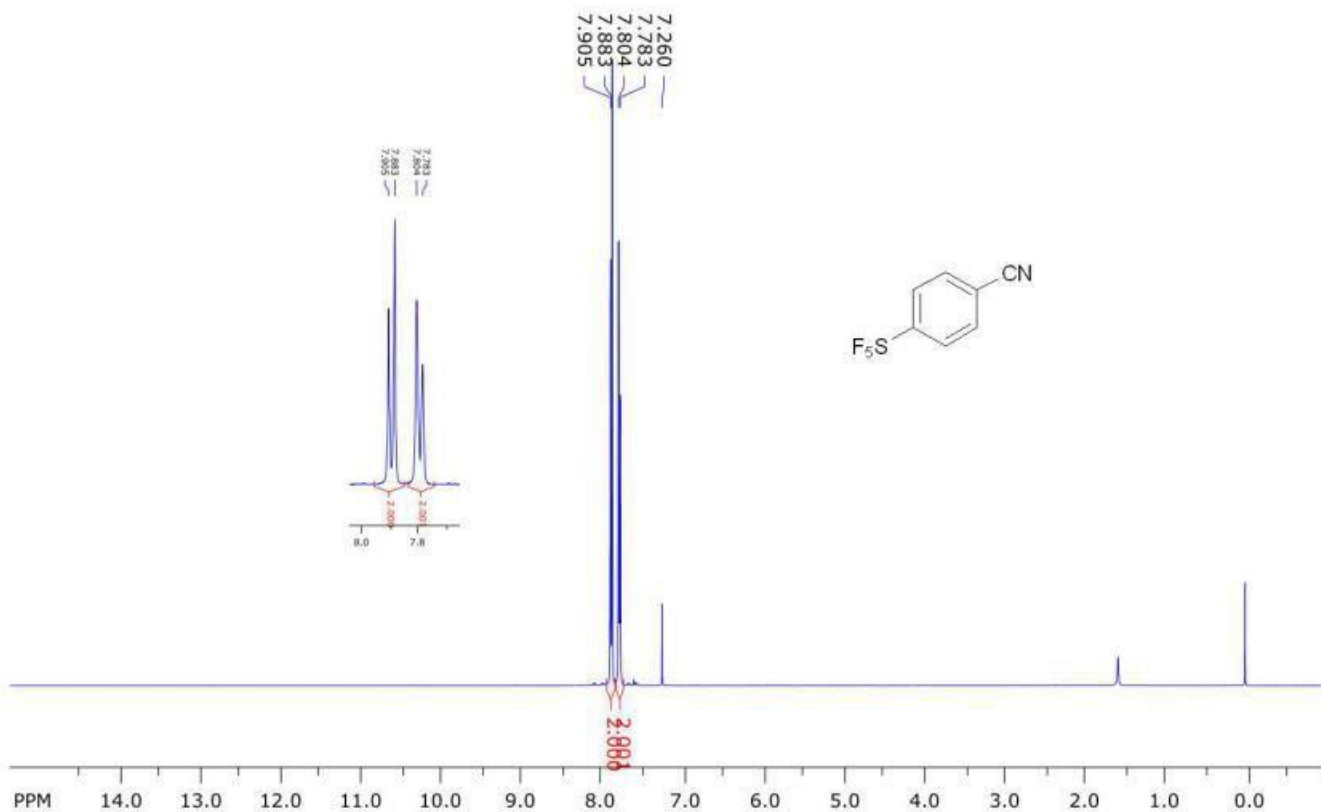

file: ...\\NAPO\\NMR\\JELA\\nmr\\jn-SVS-39\\1\\fid exp: <zg30>  
transmitter freq.: 400.132471 MHz  
time domain size: 65536 points  
width: 8196.72 Hz = 20.4850 ppm = 0.125072 Hz/pt  
number of scans: 16

freq. of 0 ppm: 400.130009 MHz  
processed size: 65536 complex points  
LB: 0.300 GF: 0.0000  
Hz/cm: 264.399 ppm/cm: 0.66078

# Compound 2d

SpinWorks 4: SVS 39 13C CDCl3

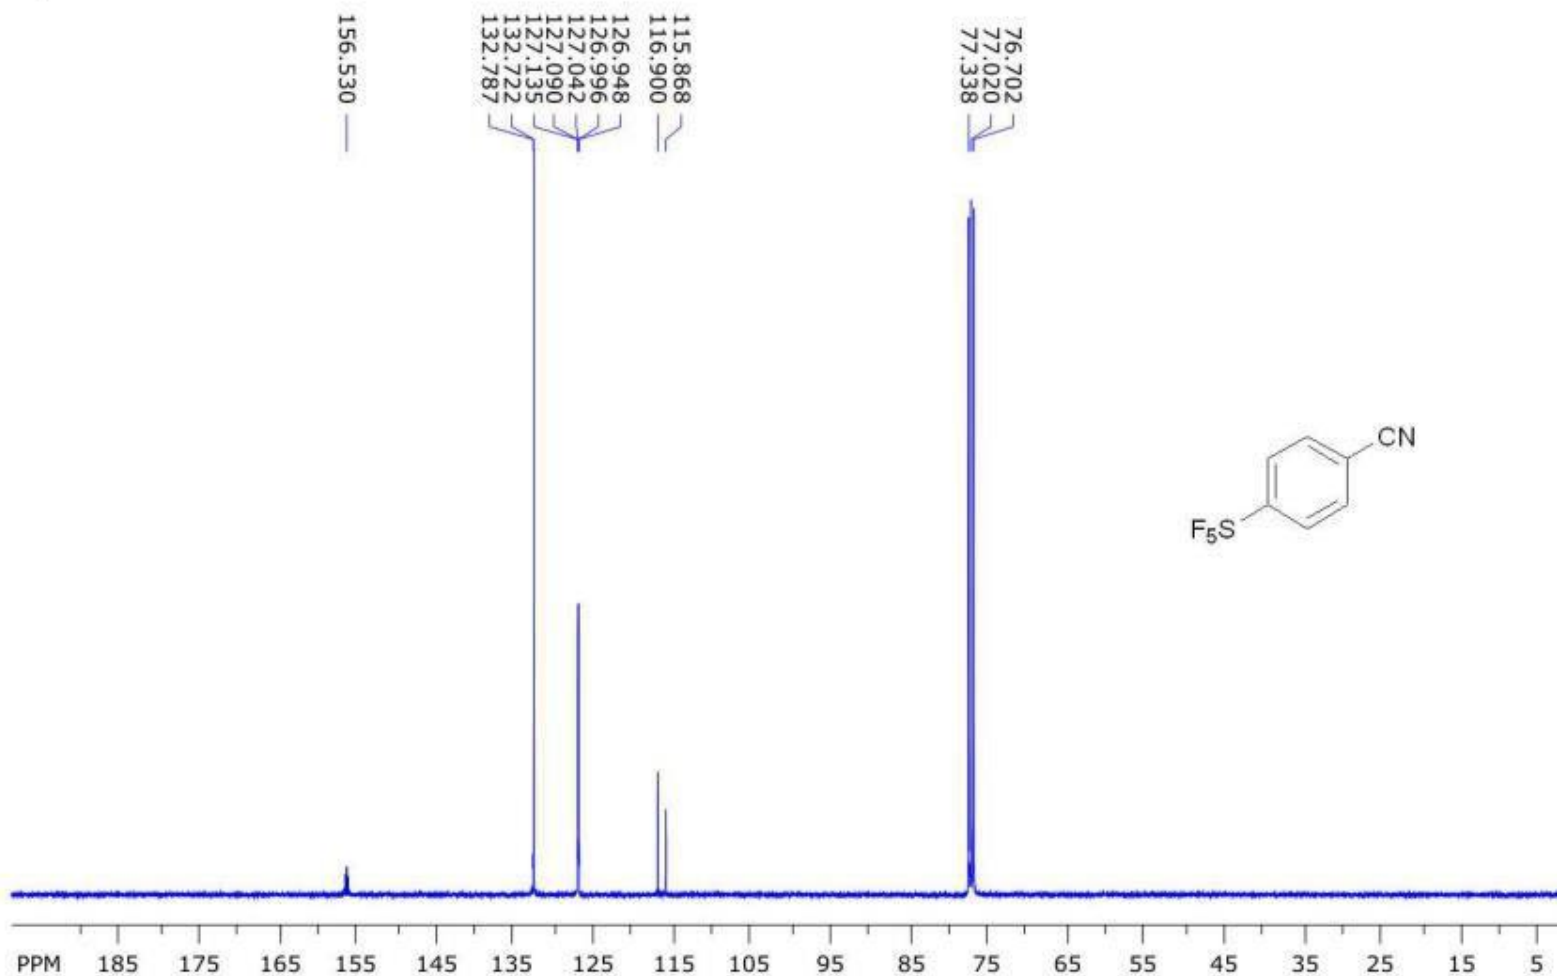

file: D:\NAPO\NMR\JELA\jn-SVS-39\2\fid expt: <zgpg30>  
transmitter freq.: 100.622830 MHz  
time domain size: 65536 points  
width: 23809.52 Hz = 236.6215 ppm = 0.363305 Hz/pt  
number of scans: 3700

freq. of 0 ppm: 100.612769 MHz  
processed size: 32768 complex points  
LB: 1.000 GF: 0.0000  
Hz/cm: 797.514 ppm/cm: 7.92577

# Compound 2e

SpinWorks 4: IVA 2625 1H CDCI3

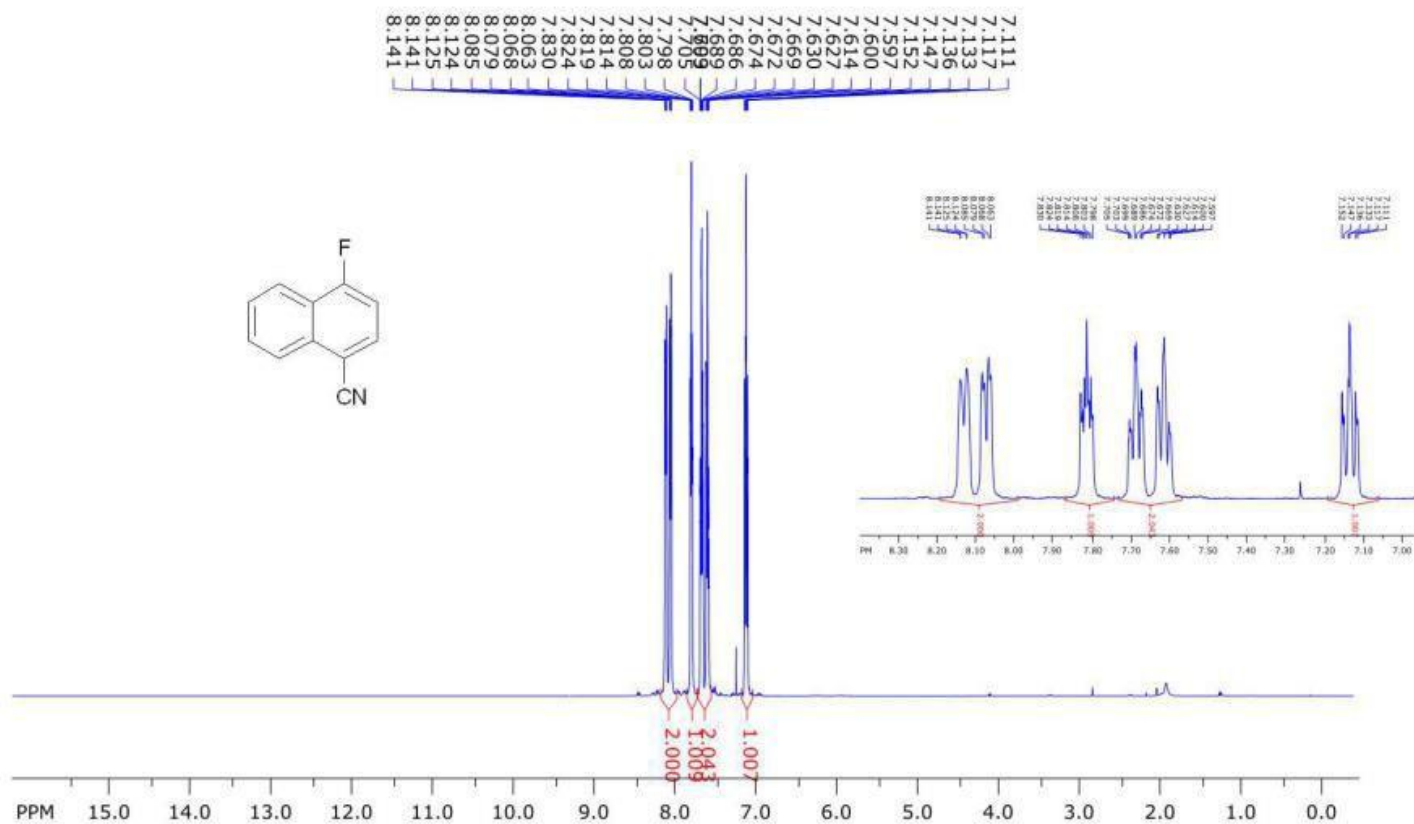

file: ...NAP0\NMR\500-2\mkr10706\3 2625\fid expt: <zg30>  
 transmitter freq.: 500.133001 MHz  
 time domain size: 65536 points  
 width: 12335.53 Hz = 24.6645 ppm = 0.188225 Hz/pt  
 number of scans: 24

freq. of 0 ppm: 500.130023 MHz  
 processed size: 65536 complex points  
 LB: 0.300 GF: 0.0000  
 Hz/cm: 334.042 ppm/cm: 0.66791

# Compound 2e

SpinWorks 4: IVA 2625 13C CDCl3

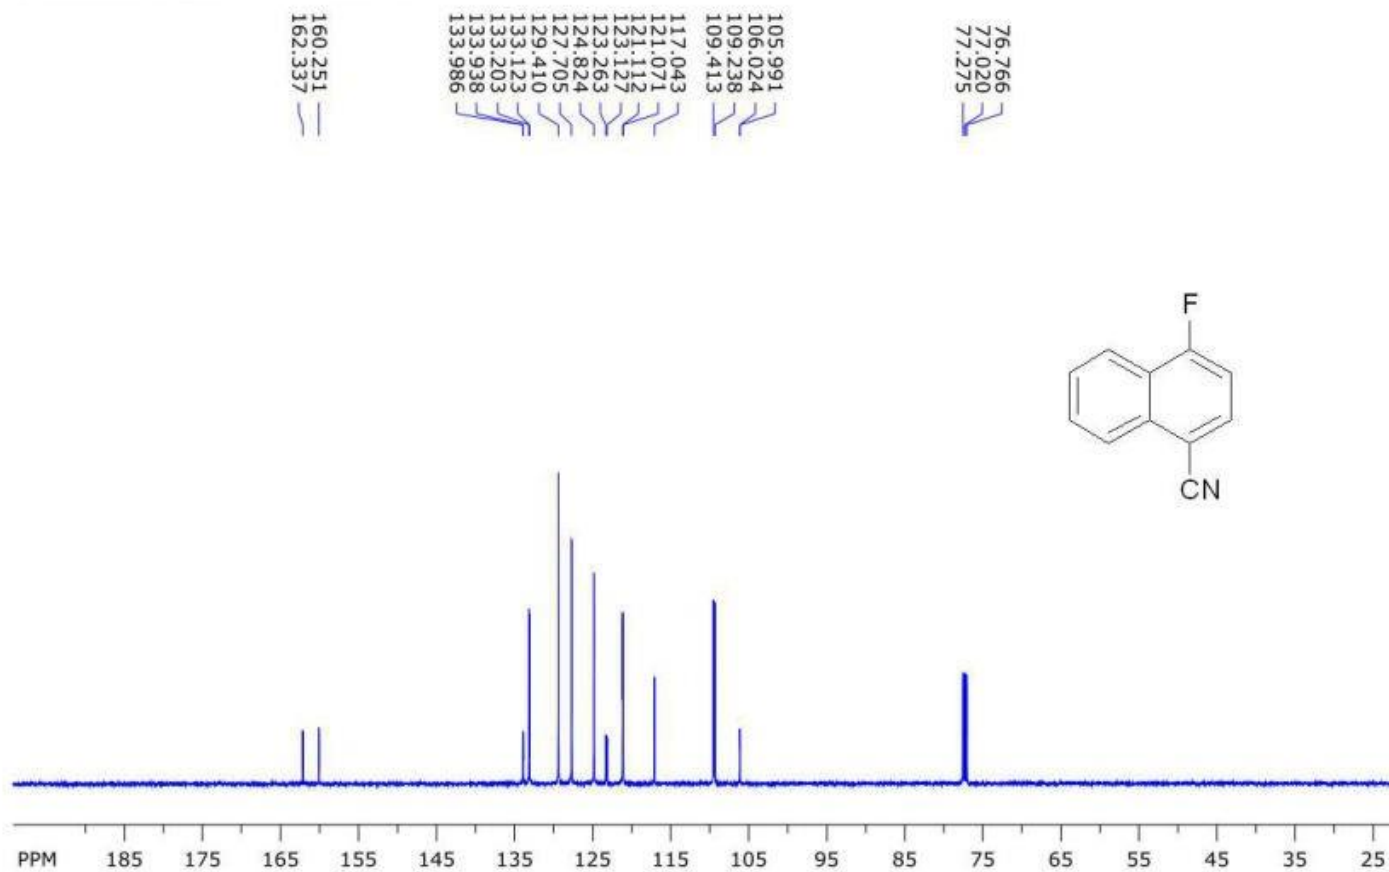

file: D:\NAPO\NMR\500-2\mkr10706\4\fid expt: <zggp30>  
 transmitter freq.: 125.772879 MHz  
 time domain size: 65536 points  
 width: 36057.69 Hz = 286.6889 ppm = 0.550197 Hz/pt  
 number of scans: 512

freq. of 0 ppm: 125.757813 MHz  
 processed size: 32768 complex points  
 LB: 2.000 GF: 0.0000  
 Hz/cm: 899.847 ppm/cm: 7.15454





# Compound 2f

SpinWorks 4: IVA 1961 13C DMSO

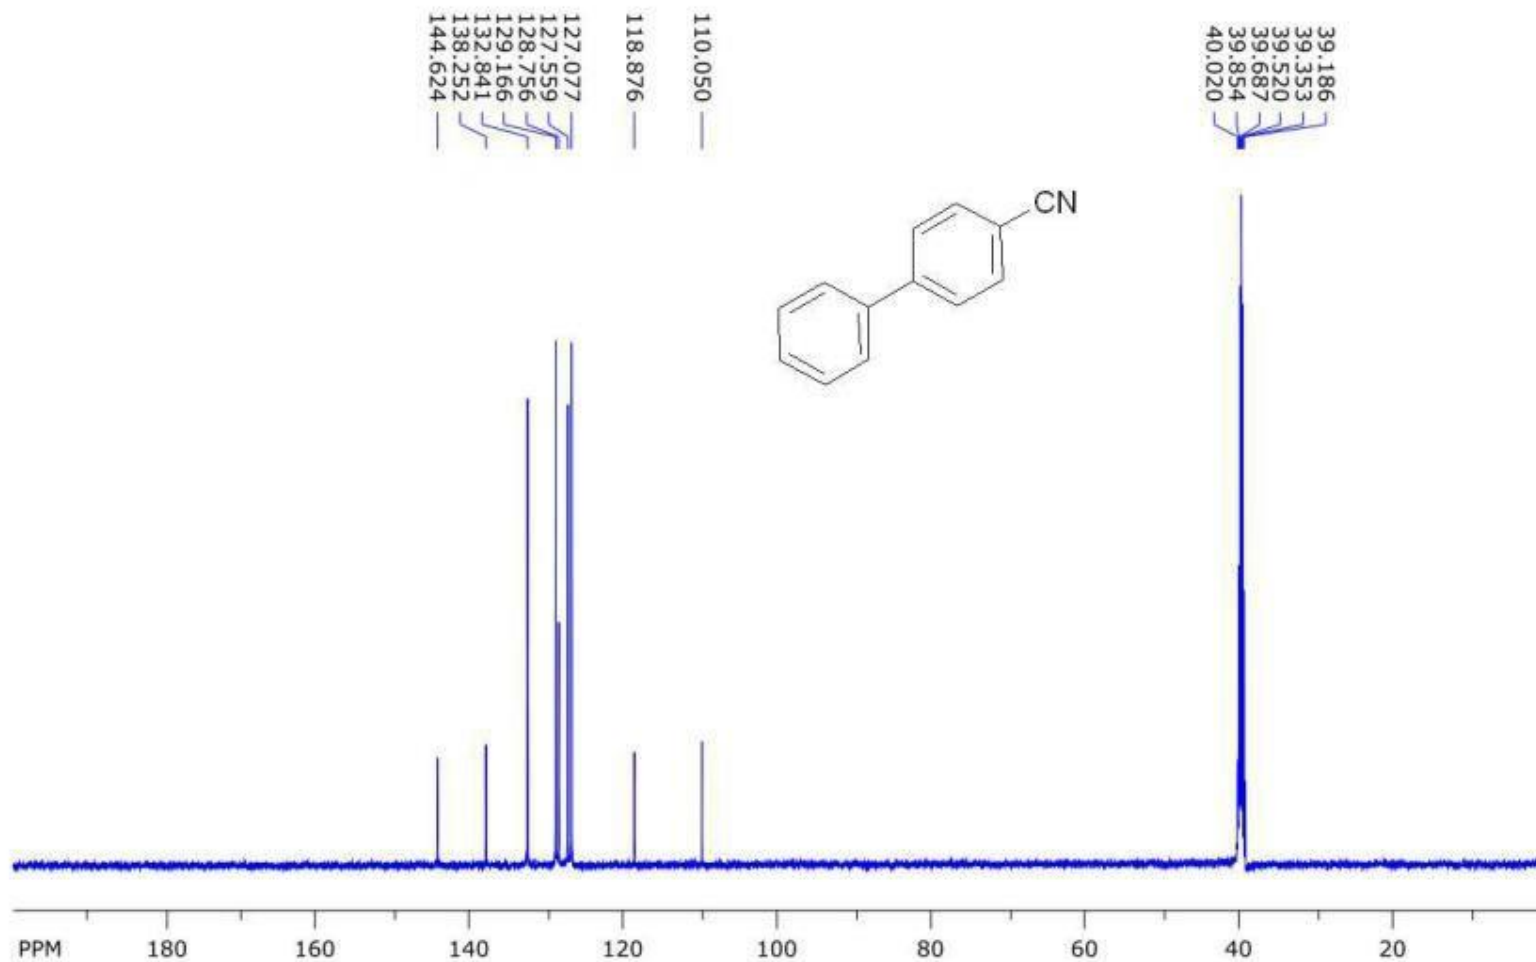

file: D:\NAPO\NMR\500-2\mkr12203\24\fid exp: <zpgp30>  
transmitter freq.: 125.772879 MHz  
time domain size: 65536 points  
width: 36057.69 Hz = 286.6889 ppm = 0.550197 Hz/pt  
number of scans: 512

freq. of 0 ppm: 125.757846 MHz  
processed size: 32768 complex points  
LB: 2.000 GF: 0.0000  
Hz/cm: 1008.339 ppm/cm: 8.01714

# Compound 2g

SpinWorks 4: IVA 1926 1H CDCI3

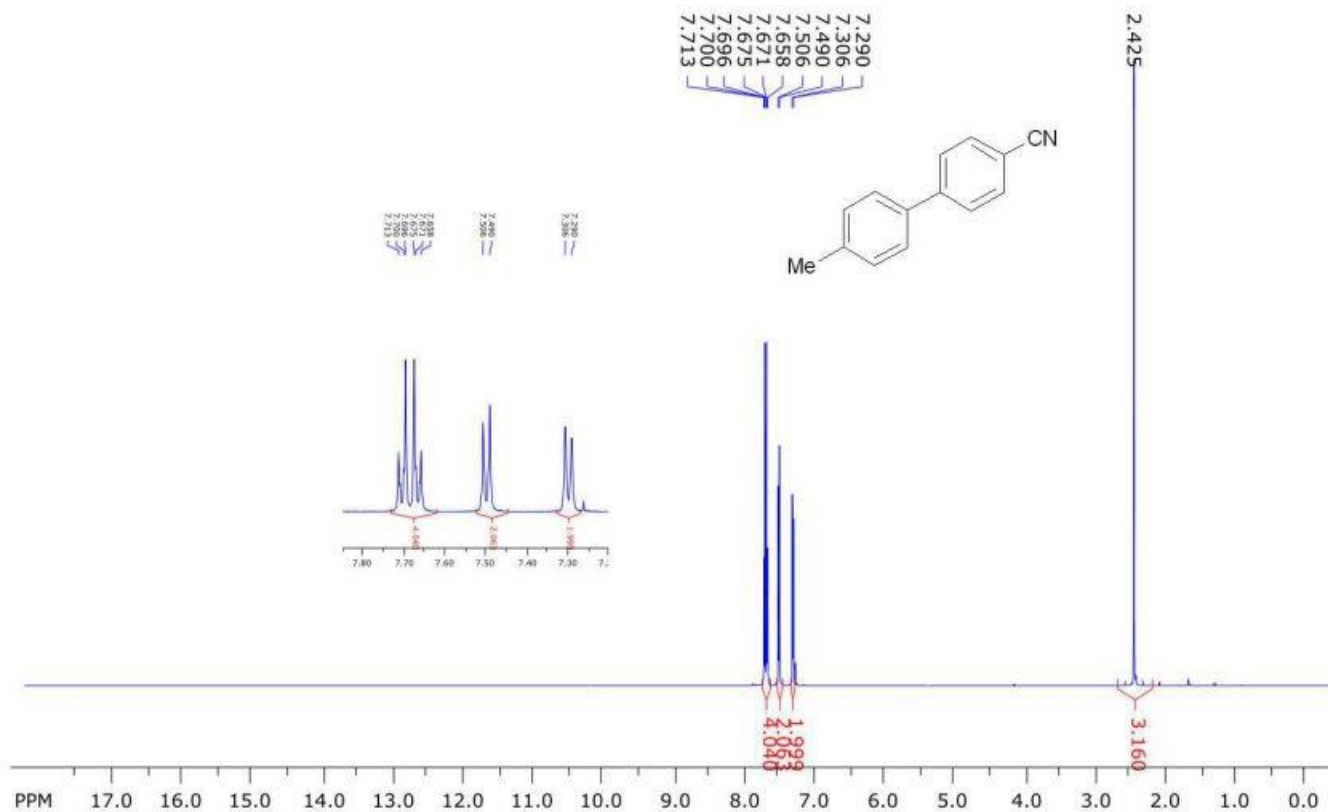

file: D:\NAPO\NMR\500-2\mkr11502\29\fid expt: <zg30>  
 transmitter freq.: 500.133001 MHz  
 time domain size: 65536 points  
 width: 12335.53 Hz = 24.6645 ppm = 0.188225 Hz/pt  
 number of scans: 24

freq. of 0 ppm: 500.130023 MHz  
 processed size: 65536 complex points  
 LB: 0.300 GF: 0.0000  
 Hz/cm: 378.799 ppm/cm: 0.75740

Compound 2g

SpinWorks 4: IVA 1926 13C CDCI3

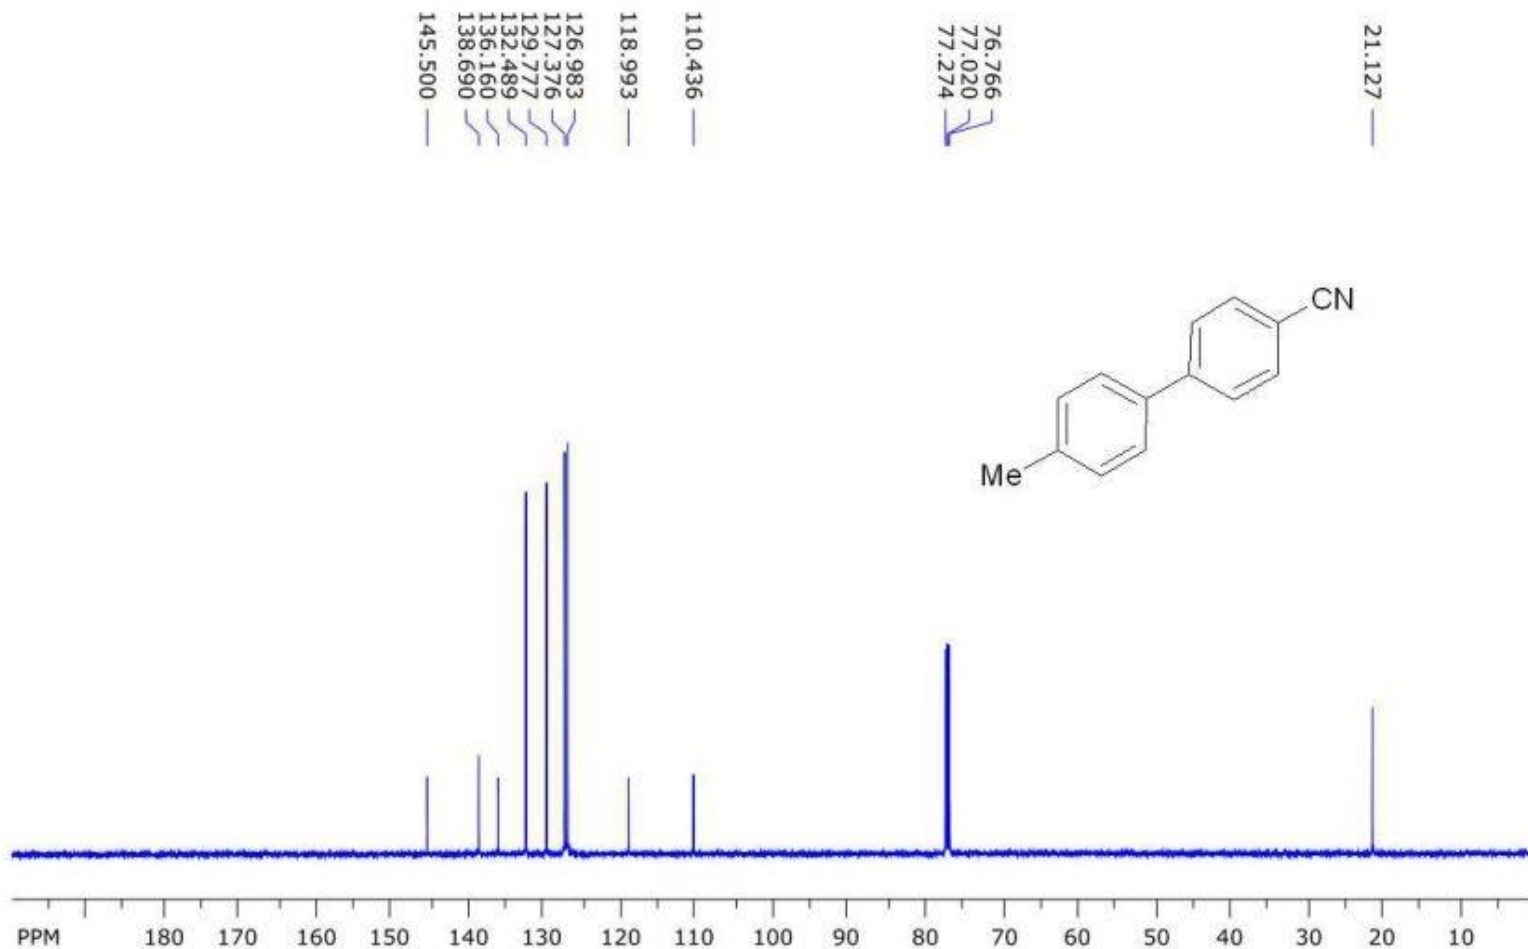

file: D:\NAPO\NMR\500-2\mkr11502\30\fid exp: <zgpg30>  
 transmitter freq.: 125.772879 MHz  
 time domain size: 65536 points  
 width: 36057.69 Hz = 286.6889 ppm = 0.550197 Hz/pt  
 number of scans: 512

freq. of 0 ppm: 125.757802 MHz  
 processed size: 32768 complex points  
 LB: 2.000 GF: 0.0000  
 Hz/cm: 1003.553 ppm/cm: 7.97909

# Compound 2h

SpinWorks 4: SVS 36 1H CDCl3

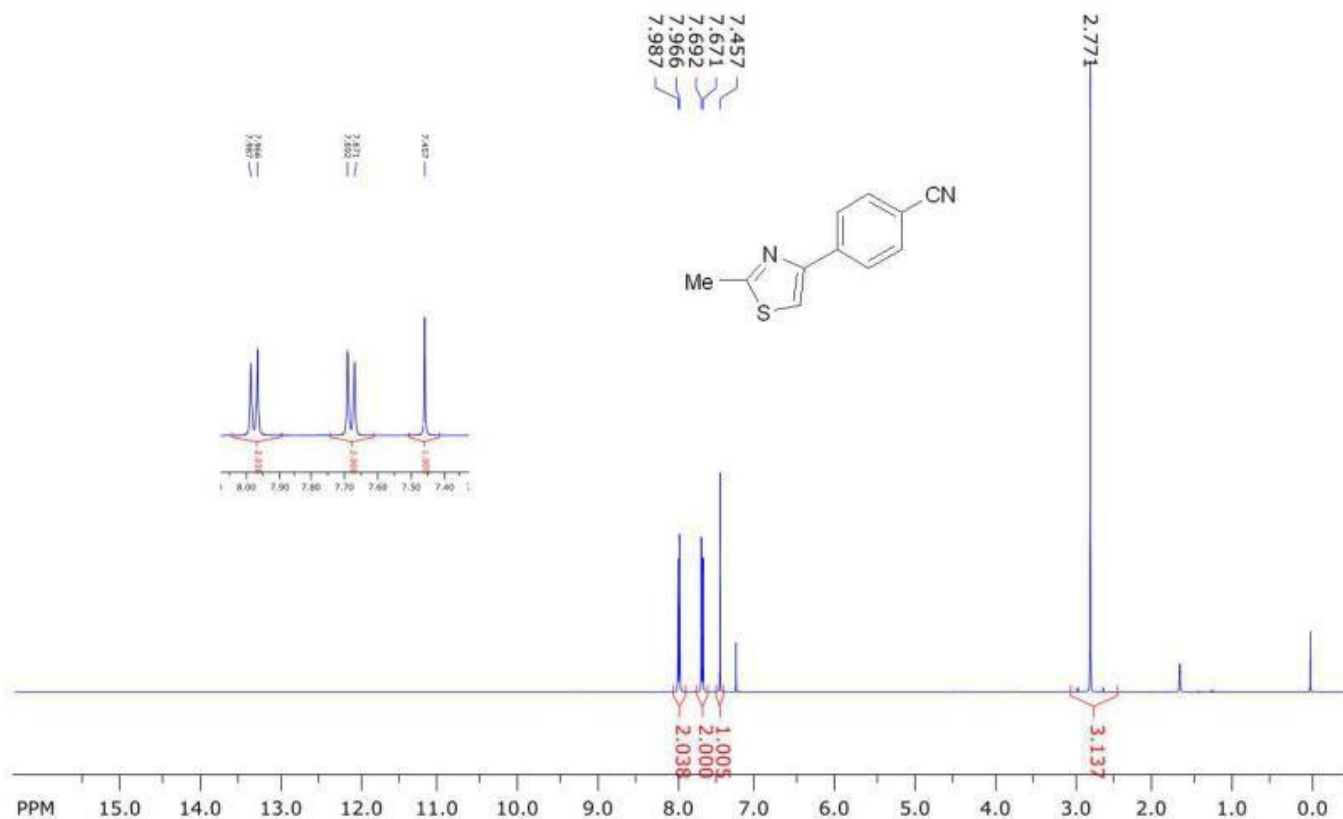

file: ...\\NAPO\\NMR\\JELA\\nmr\\jn-SVS-36\\1\\fid exp: <zg30>  
 transmitter freq.: 400.132471 MHz  
 time domain size: 65536 points  
 width: 8196.72 Hz = 20.4850 ppm = 0.125072 Hz/pt  
 number of scans: 16

freq. of 0 ppm: 400.130012 MHz  
 processed size: 65536 complex points  
 LB: 0.300 GF: 0.0000  
 Hz/cm: 270.927 ppm/cm: 0.67709

Compound 2h

SpinWorks 4: SVS 36 13C CDCl3

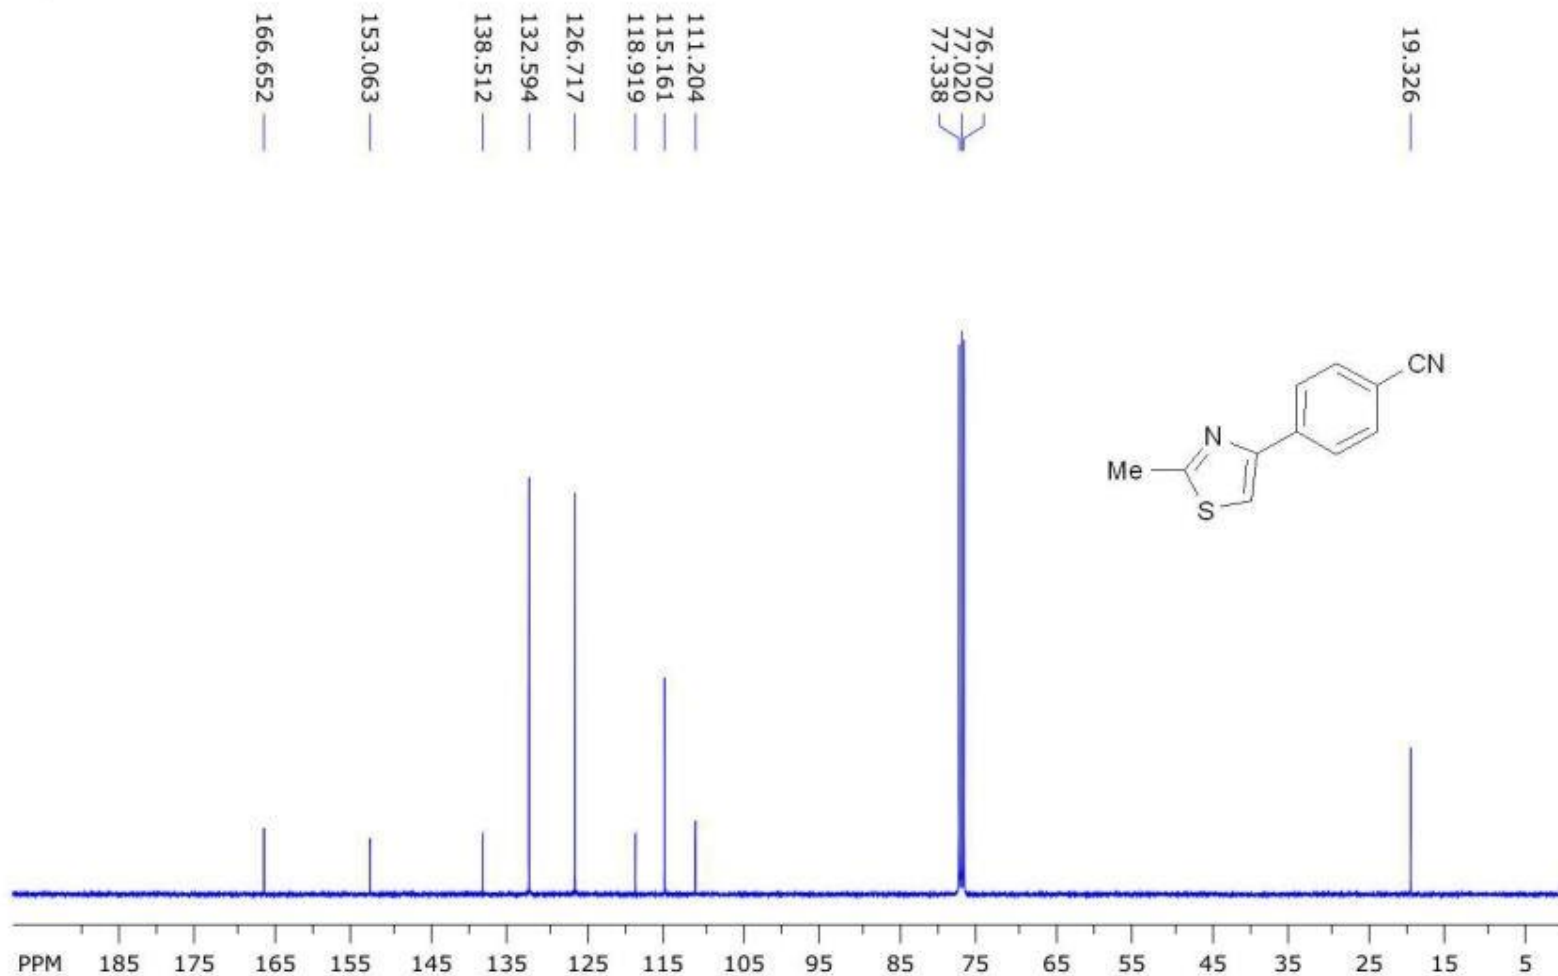

file: D:\NAPO\NMR\JELA\jn-SVS-36\2\fid expt: <zgpg30>  
 transmitter freq.: 100.622830 MHz  
 time domain size: 65536 points  
 width: 23809.52 Hz = 236.6215 ppm = 0.363305 Hz/pt  
 number of scans: 3700

freq. of 0 ppm: 100.612770 MHz  
 processed size: 32768 complex points  
 LB: 1.000 GF: 0.0000  
 Hz/cm: 804.888 ppm/cm: 7.99906

# Compound 2i

SpinWorks 4: SVS 34 1H CDCI3

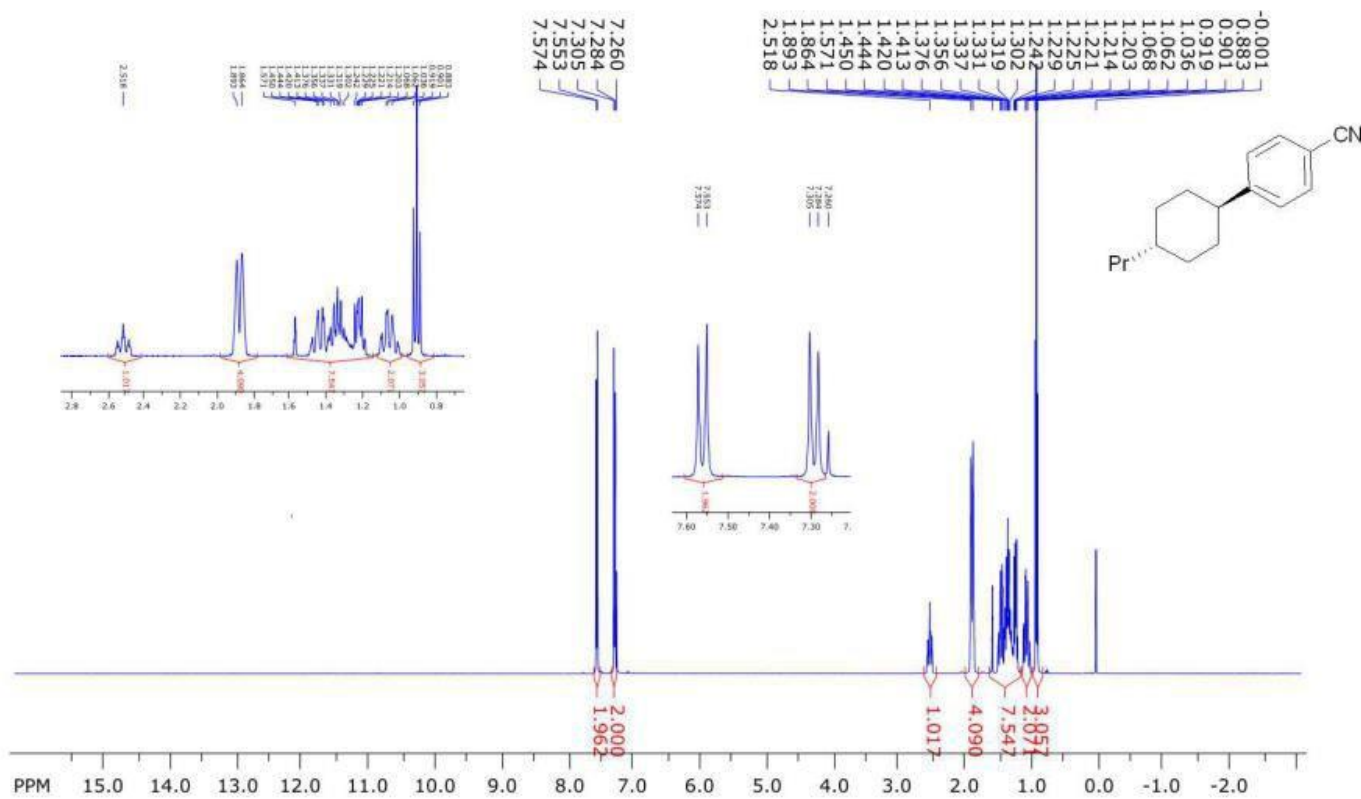

file: ... \NAPO\NMR\JELA\nmr\jn-SVS-34\1\fid exp: <zg30>  
 transmitter freq.: 400.132471 MHz  
 time domain size: 65536 points  
 width: 8196.72 Hz = 20.4850 ppm = 0.125072 Hz/pt  
 number of scans: 16

freq. of 0 ppm: 400.130009 MHz  
 processed size: 65536 complex points  
 LB: 0.300 GF: 0.0000  
 Hz/cm: 313.361 ppm/cm: 0.78314

# Compound 2i

SpinWorks 4: SVS 34 13C CDCI3

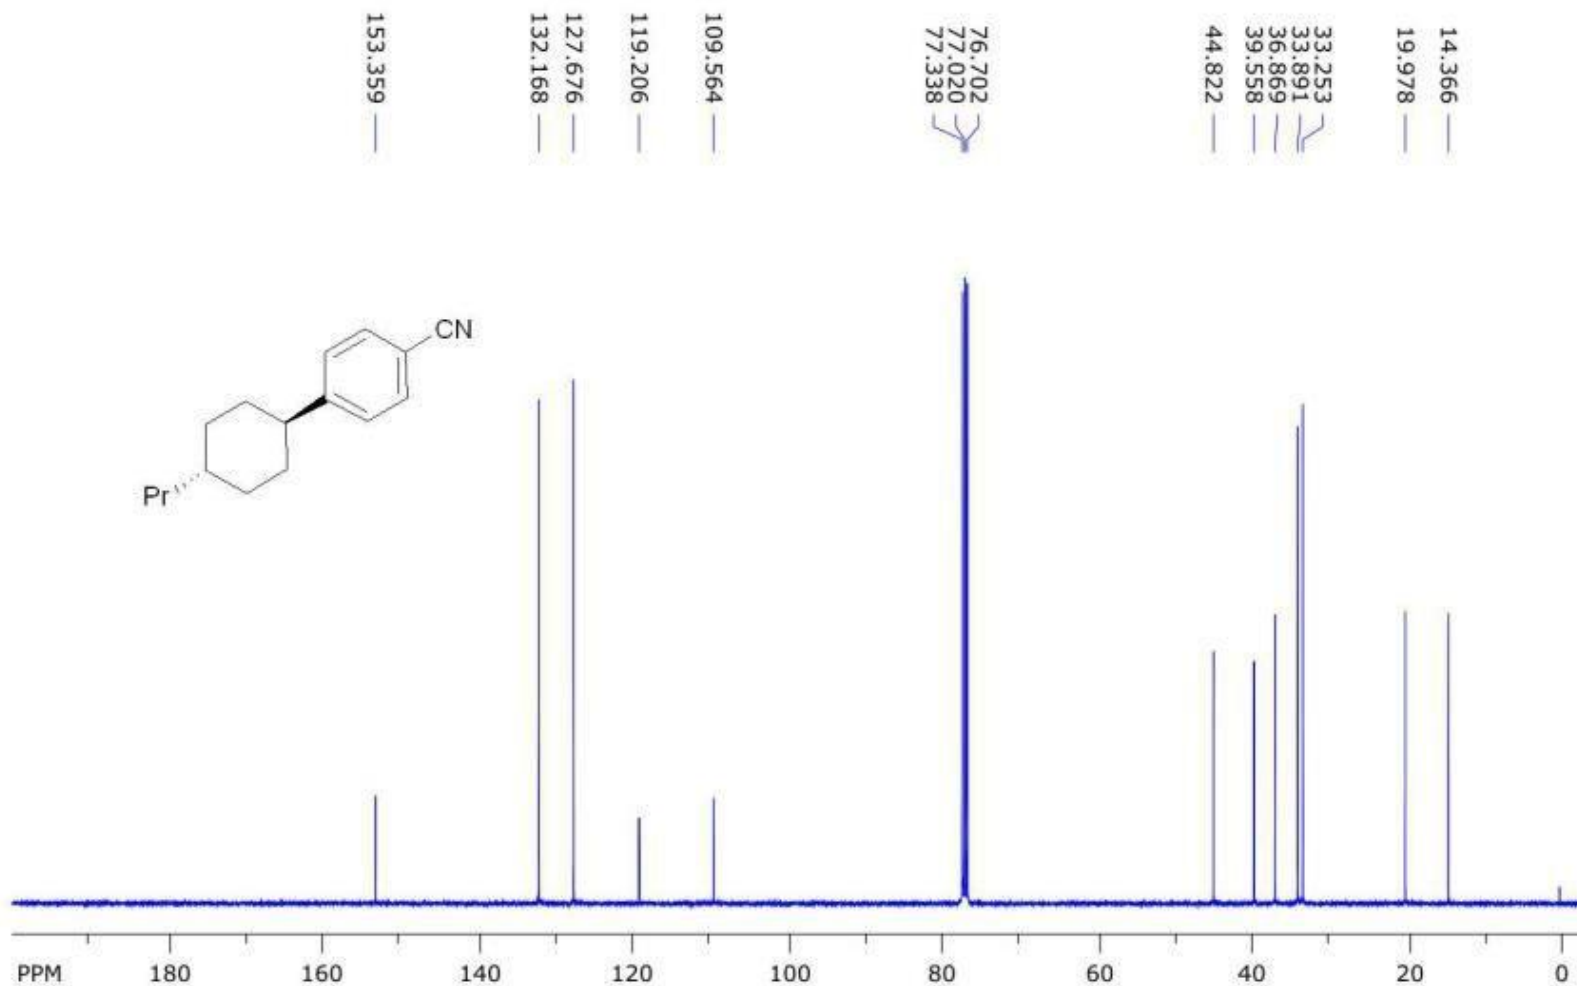

file: D:\NAPO\NMR\JELA\jn-SVS-34\2\fid expt: <zgpg30>  
 transmitter freq.: 100.622830 MHz  
 time domain size: 65536 points  
 width: 23809.52 Hz = 236.6215 ppm = 0.363305 Hz/pt  
 number of scans: 4000

freq. of 0 ppm: 100.612769 MHz  
 processed size: 32768 complex points  
 LB: 1.000 GF: 0.0000  
 Hz/cm: 821.184 ppm/cm: 8.16101

# Compound 2j

SpinWorks 4: IVA 2202 1H CDCI3

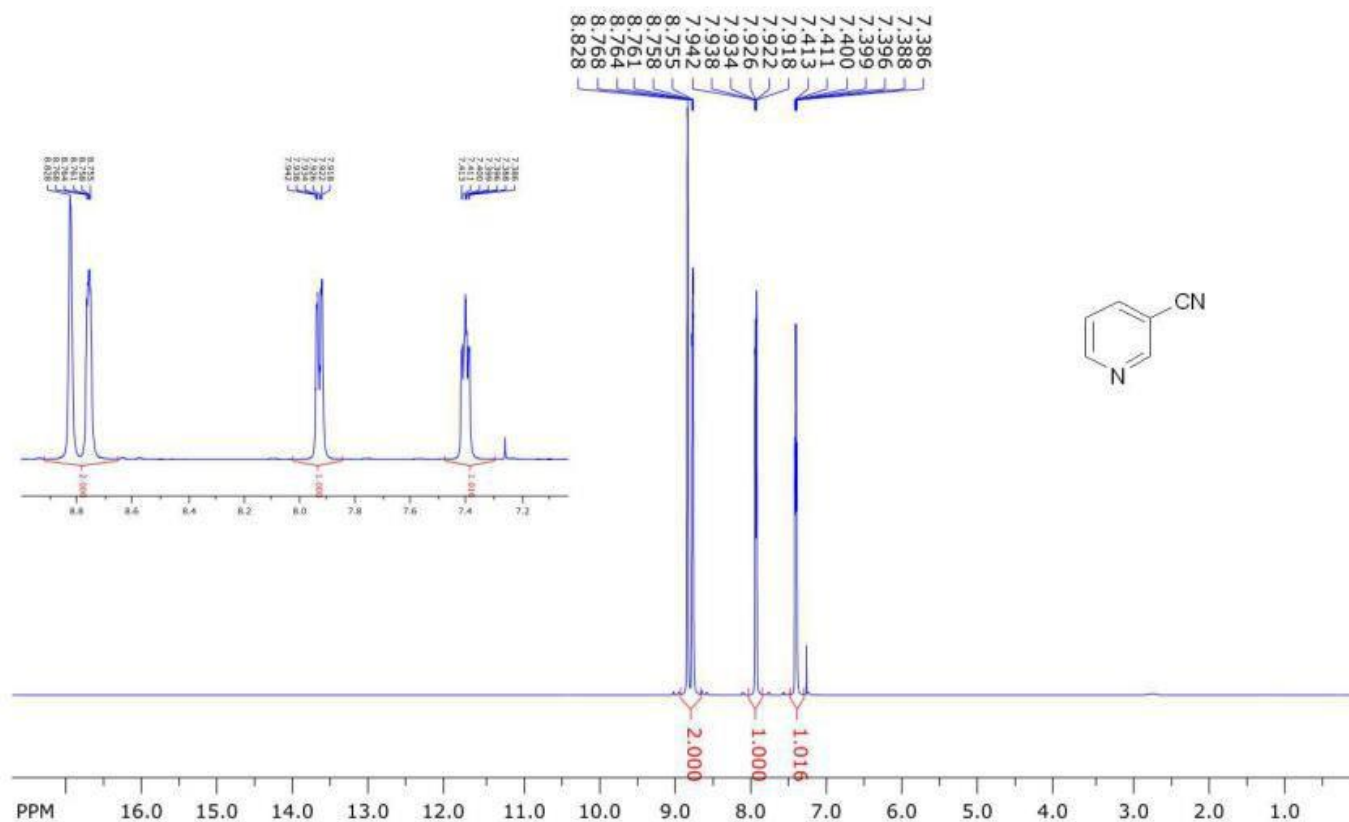

file: D:\NAPO\NMR\500-2\mkr11204\25\fid expt: <zg30>  
 transmitter freq.: 500.133001 MHz  
 time domain size: 65536 points  
 width: 12335.53 Hz = 24.6645 ppm = 0.188225 Hz/pt  
 number of scans: 24

freq. of 0 ppm: 500.130025 MHz  
 processed size: 65536 complex points  
 LB: 0.300 GF: 0.0000  
 Hz/cm: 354.237 ppm/cm: 0.70829



Compound 2j

SpinWorks 4: IVA 2202 13C CDCL3

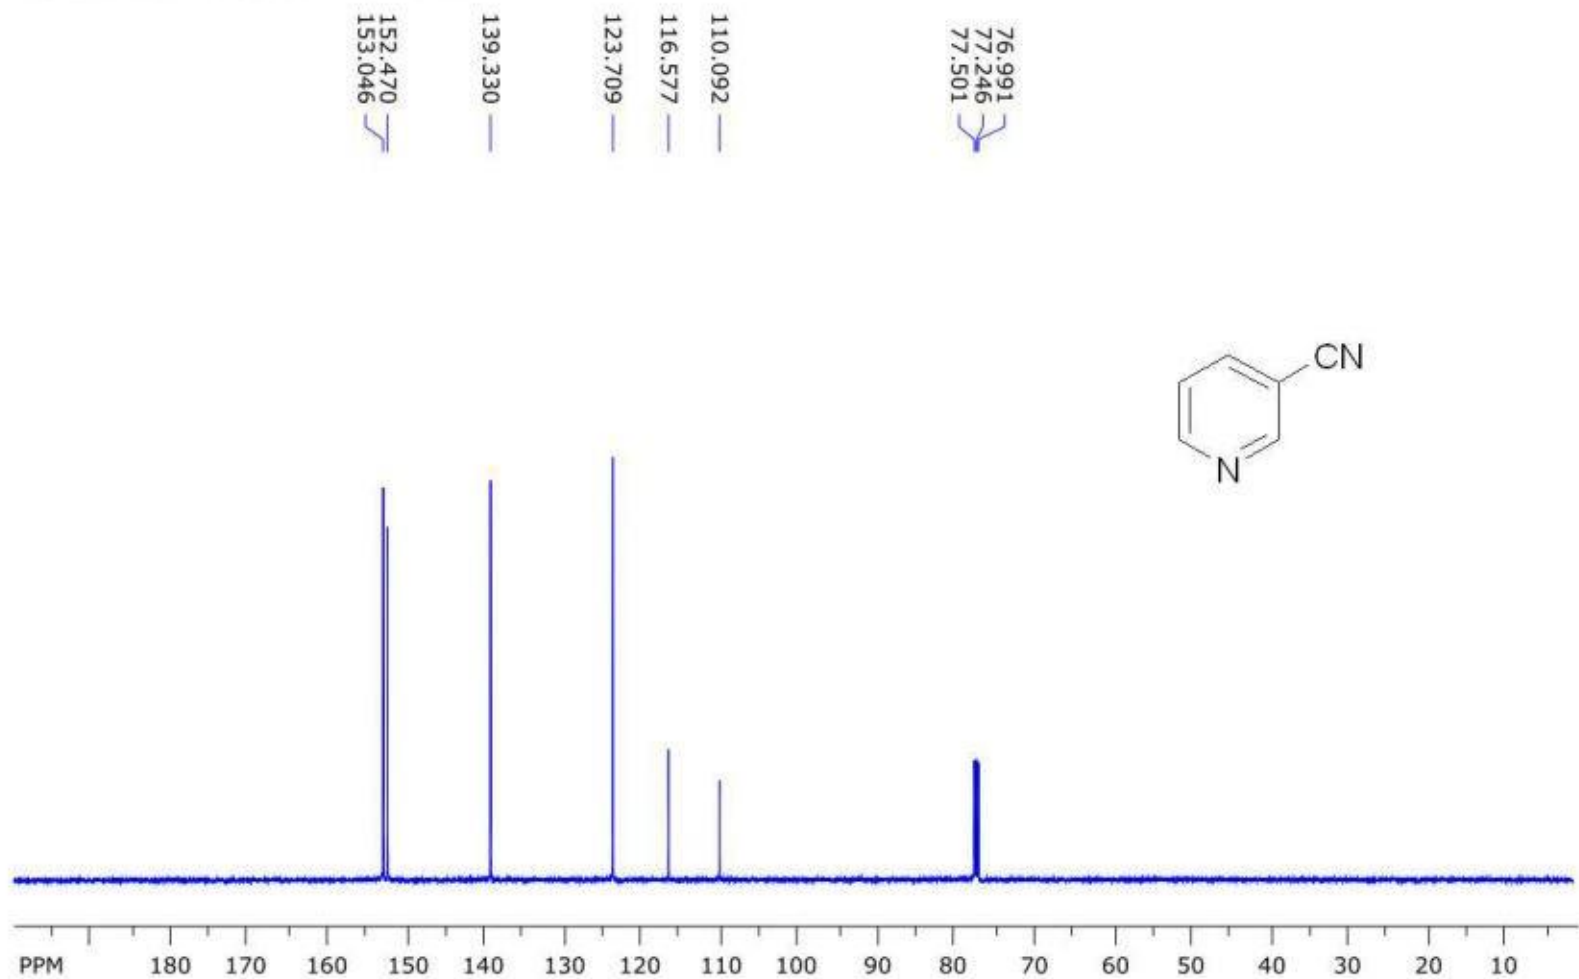

file: D:\NAPO\NMR\500-2\mkr11204\26\fid exp: <zgpg30>  
transmitter freq.: 125.772879 MHz  
time domain size: 65536 points  
width: 36057.69 Hz = 286.6889 ppm = 0.550197 Hz/pt  
number of scans: 512

freq. of 0 ppm: 125.757789 MHz  
processed size: 32768 complex points  
LB: 2.000 GF: 0.0000  
Hz/cm: 1001.957 ppm/cm: 7.96640

# Compound 2k

SpinWorks 4: IVA 2639 1H CDCI3

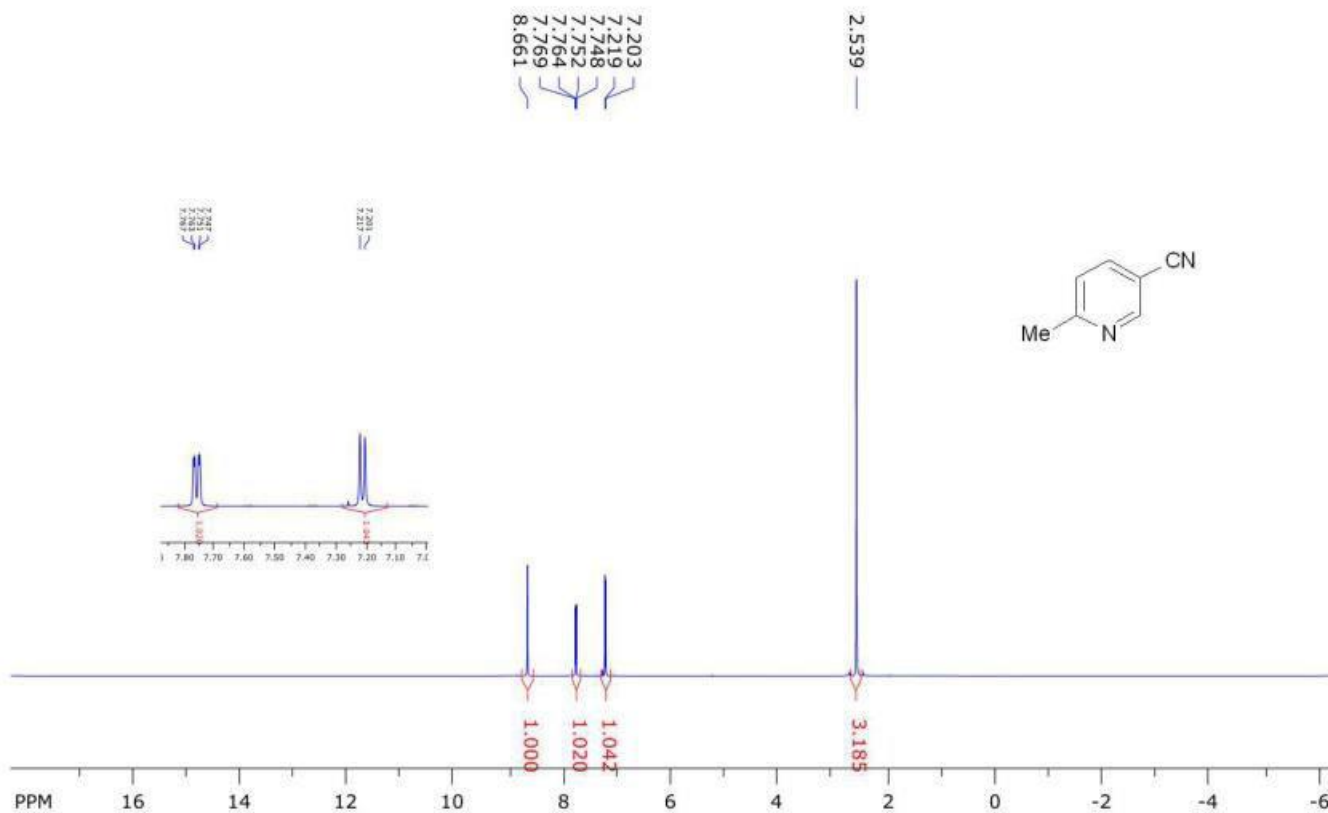

file: ...APO\NMR\500-2\mkr13105\11 2639\fid expt: <zg30>  
 transmitter freq.: 500.133001 MHz  
 time domain size: 65536 points  
 width: 12335.53 Hz = 24.6645 ppm = 0.188225 Hz/pt  
 number of scans: 24

freq. of 0 ppm: 500.130024 MHz  
 processed size: 65536 complex points  
 LB: 0.300 GF: 0.0000  
 Hz/cm: 493.421 ppm/cm: 0.98658

# Compound 2k

SpinWorks 4: IVA 2639 13C CDCl3

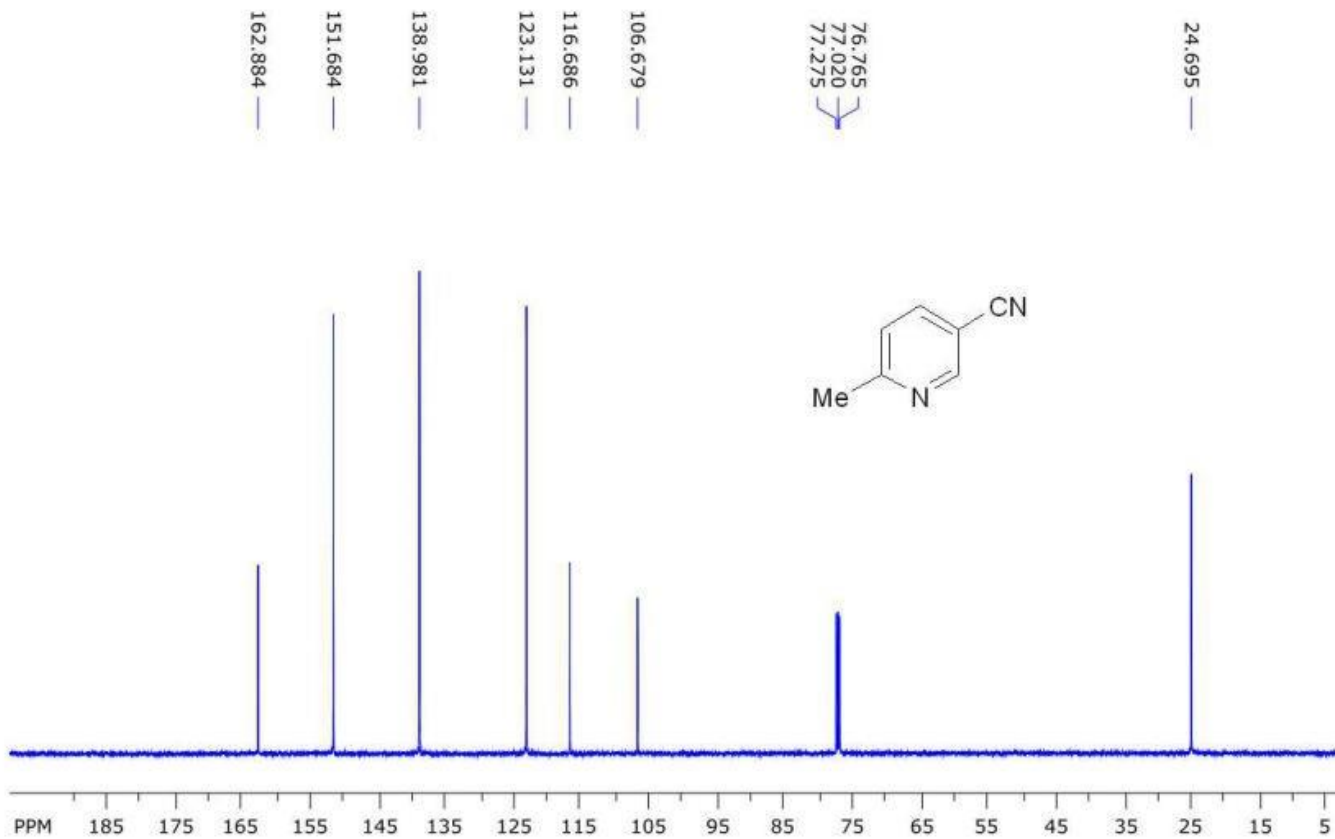

file: D:\NAPO\NMR\500-2\mkr13105\12\fid exp: <zpgg30>  
transmitter freq.: 125.772879 MHz  
time domain size: 65536 points  
width: 36057.69 Hz = 286.6889 ppm = 0.550197 Hz/pt  
number of scans: 512

freq. of 0 ppm: 125.757818 MHz  
processed size: 32768 complex points  
LB: 2.000 GF: 0.0000  
Hz/cm: 995.575 ppm/cm: 7.91566

# Compound 21

SpinWorks 4: IVA 2633 1H CDCI3

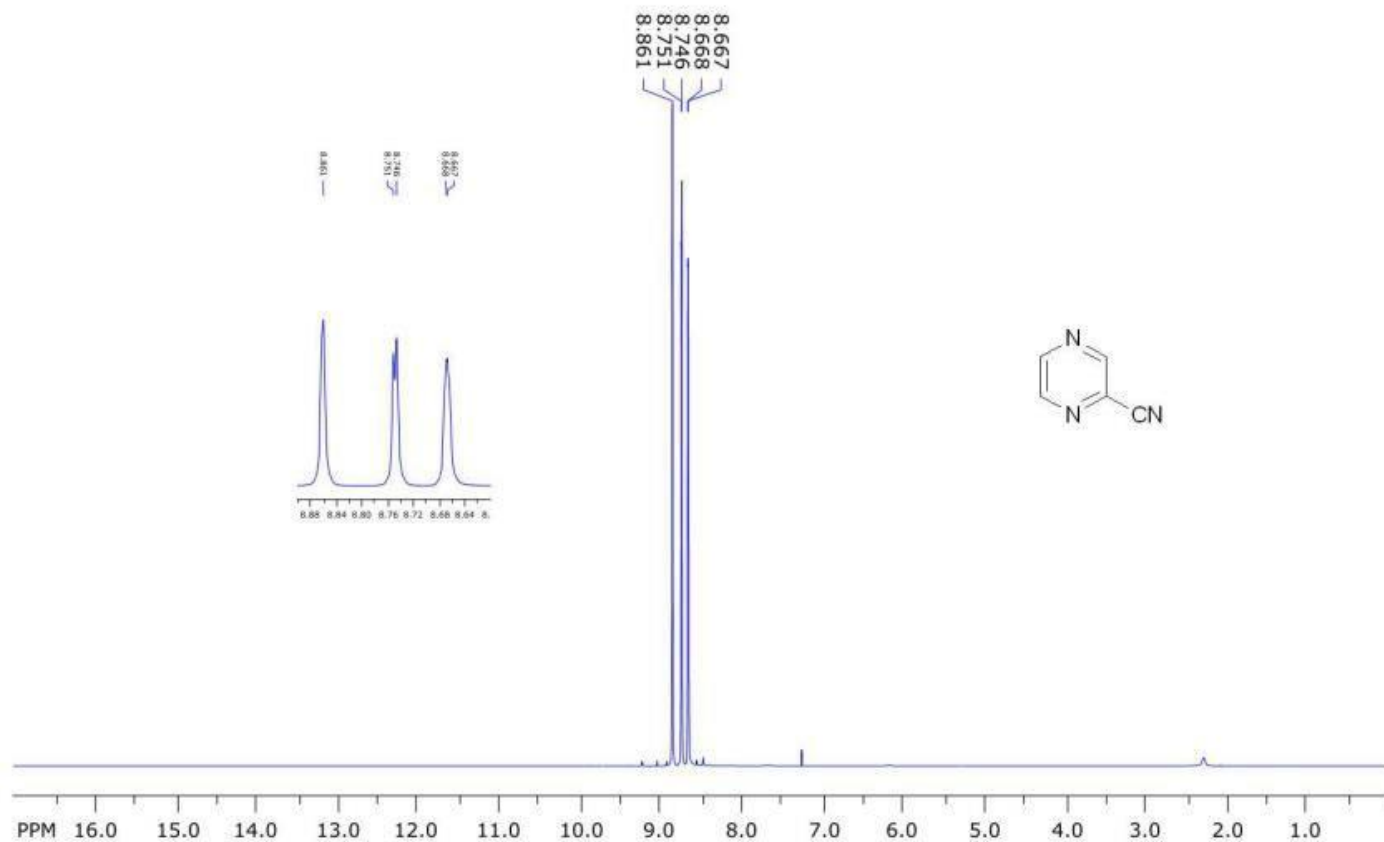

file: ...APO\NMR\500-2\mkr13105\27 2633\fid exp: <zg30>  
transmitter freq.: 500.133001 MHz  
time domain size: 65536 points  
width: 12335.53 Hz = 24.6645 ppm = 0.188225 Hz/pt  
number of scans: 24

freq. of 0 ppm: 500.130025 MHz  
processed size: 65536 complex points  
LB: 0.300 GF: 0.0000  
Hz/cm: 341.683 ppm/cm: 0.68318

# Compound 21

SpinWorks 4: IVA 2633 13C CDCl3

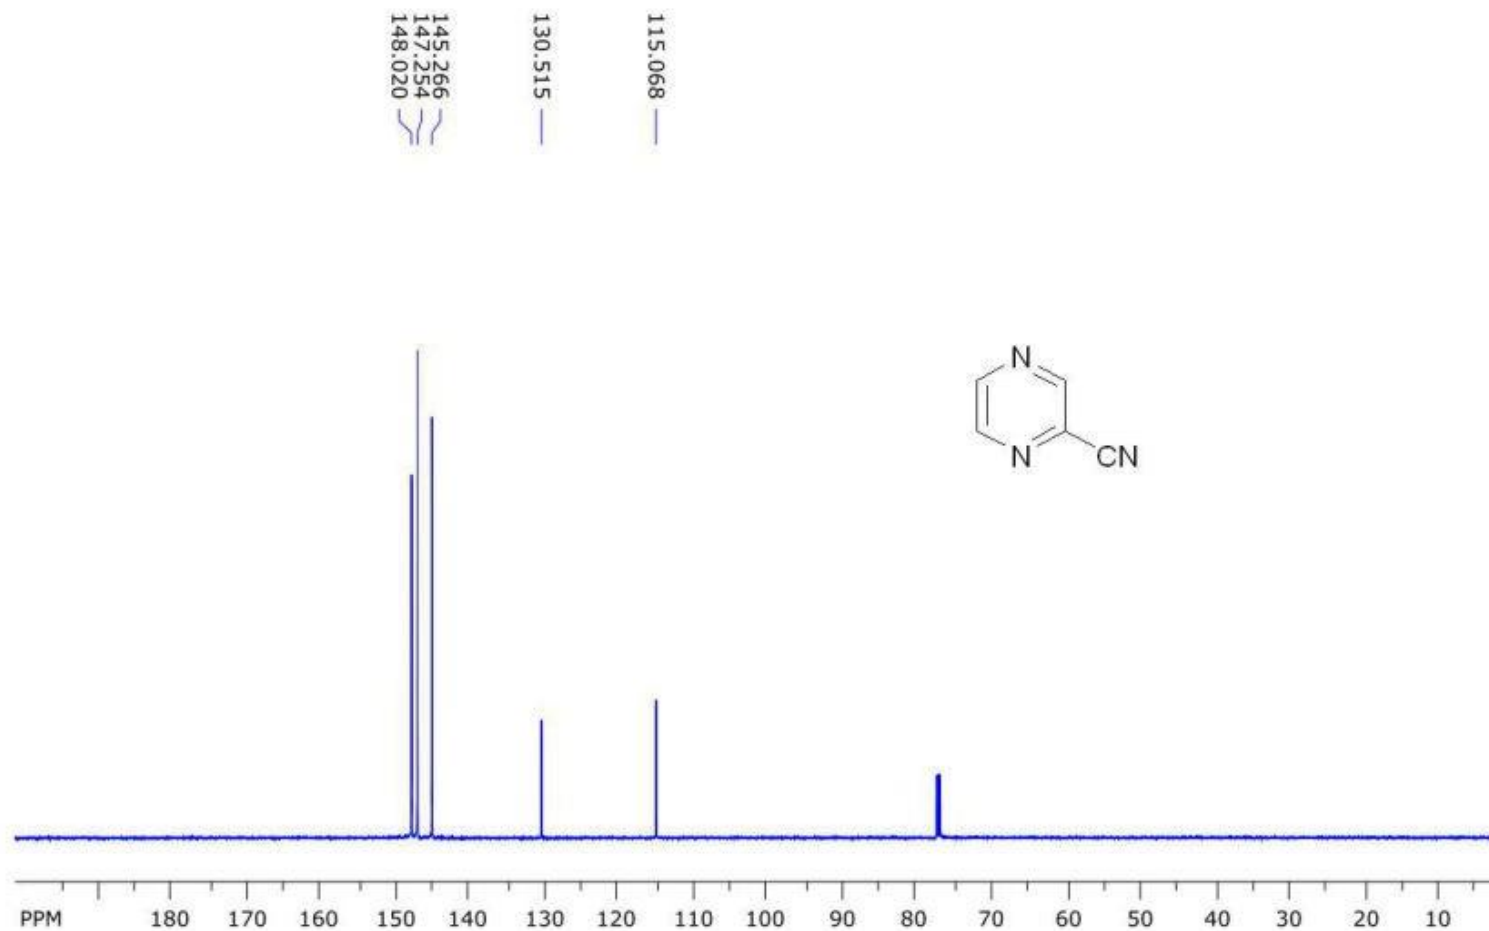

file: D:\NAPO\NMR\500-2\mkr13105\28\fid expt: <zpgp30>  
transmitter freq.: 125.772879 MHz  
time domain size: 65536 points  
width: 36057.69 Hz = 286.6889 ppm = 0.550197 Hz/pt  
number of scans: 512

freq. of 0 ppm: 125.757830 MHz  
processed size: 32768 complex points  
LB: 2.000 GF: 0.0000  
Hz/cm: 1005.148 ppm/cm: 7.99177

# Compound 2m

SpinWorks 4: IVA 1539 1H CDCI3

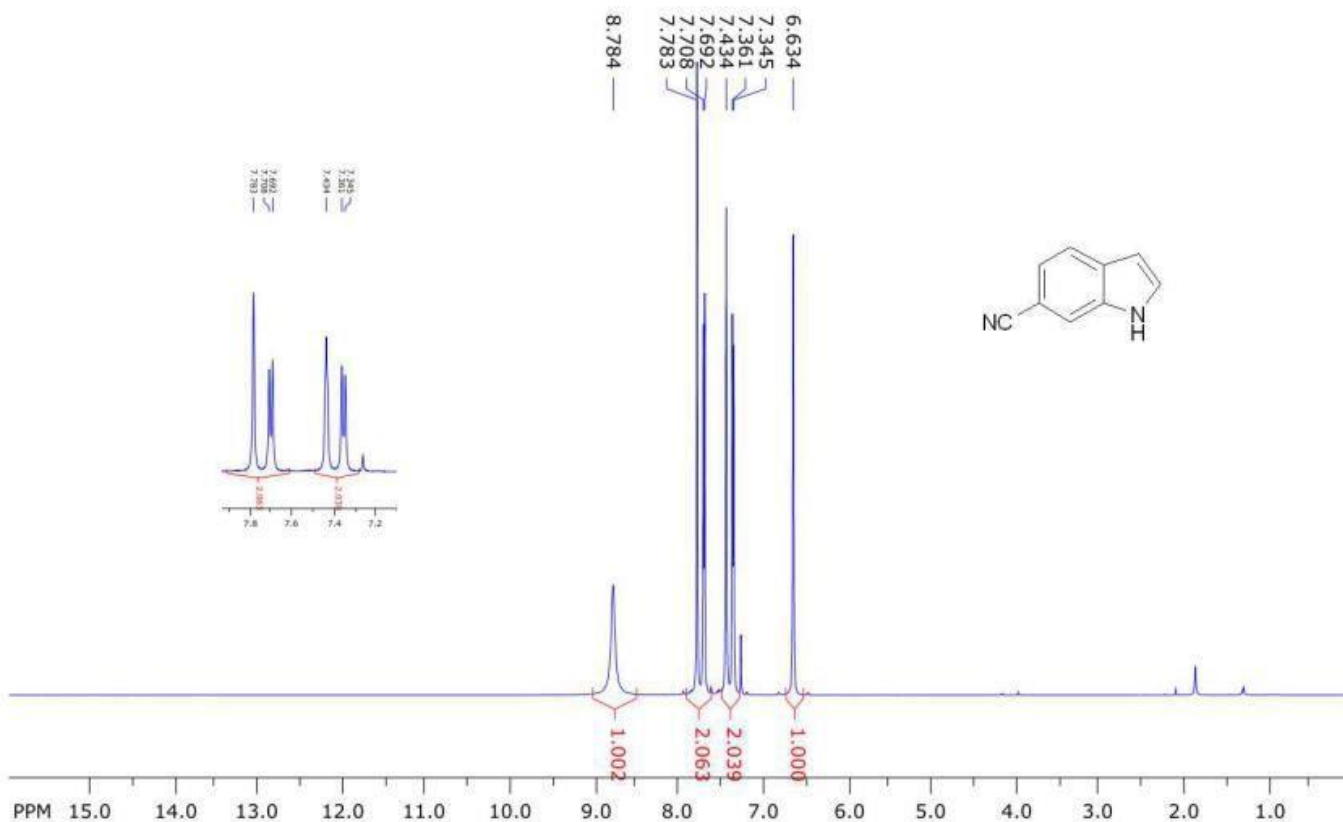

file: D:\NAPO\NMR\500-2\mkr100201\11\fid expt: <zg30>  
transmitter freq.: 500.133001 MHz  
time domain size: 65536 points  
width: 12335.53 Hz = 24.6645 ppm = 0.188225 Hz/pt  
number of scans: 24

freq. of 0 ppm: 500.130023 MHz  
processed size: 65536 complex points  
LB: 0.300 GF: 0.0000  
Hz/cm: 320.396 ppm/cm: 0.64062

# Compound 2m

SpinWorks 4: IVA 1539 13C CDCL3

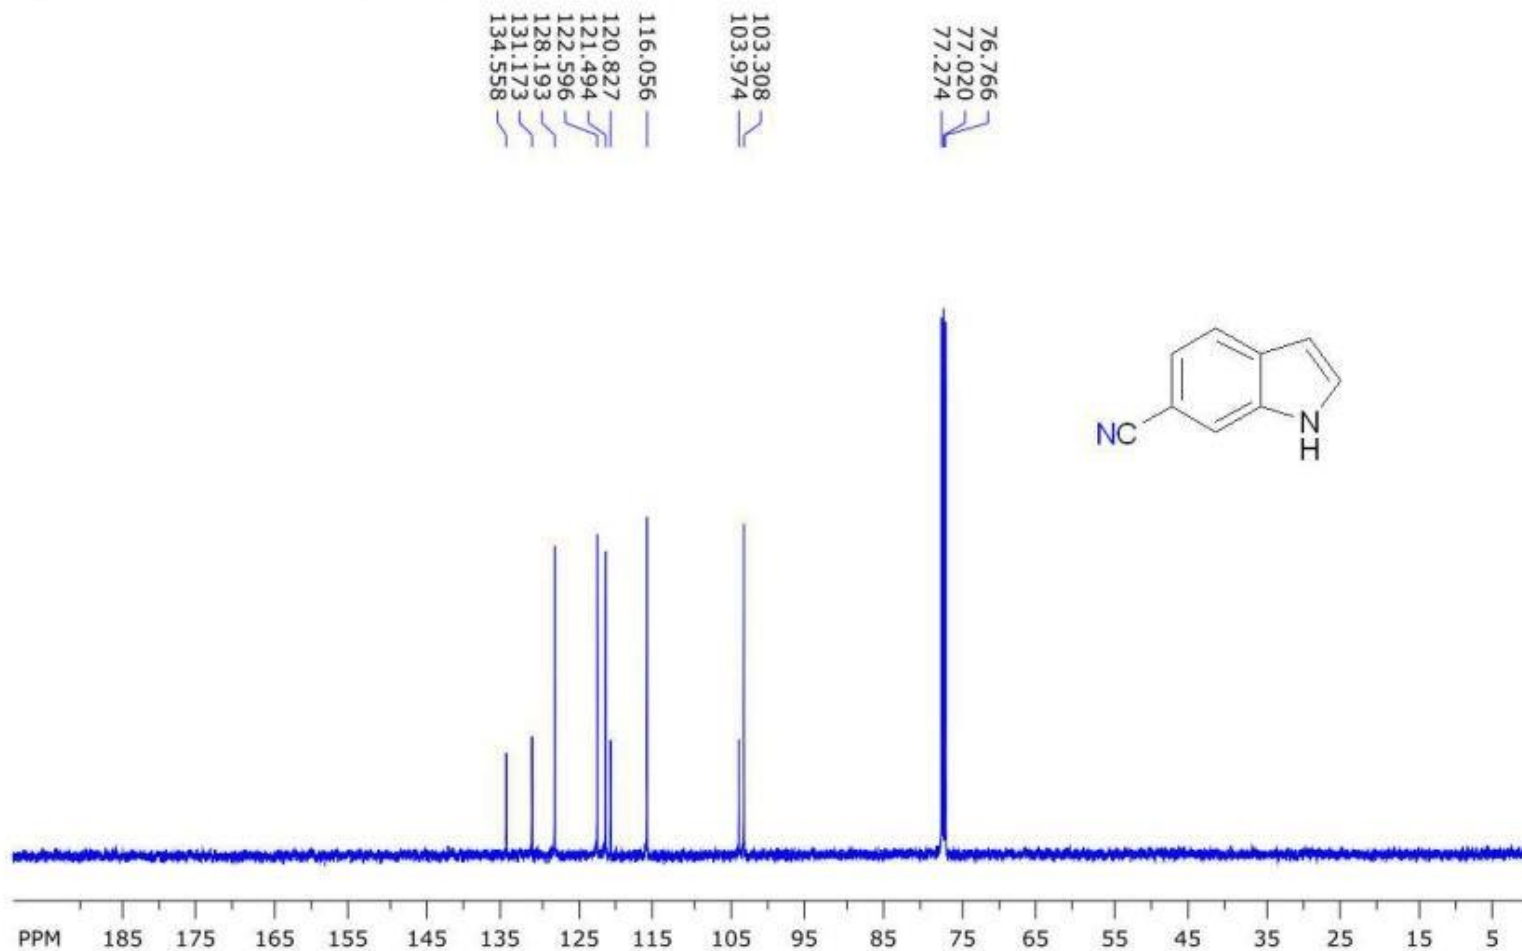

file: D:\NAPO\NMR\500-2\mkr100201\12\fid expt: <zpgg30>  
transmitter freq.: 125.772879 MHz  
time domain size: 65536 points  
width: 36057.69 Hz = 286.6889 ppm = 0.550197 Hz/pt  
number of scans: 512

freq. of 0 ppm: 125.757800 MHz  
processed size: 32768 complex points  
LB: 2.000 GF: 0.0000  
Hz/cm: 1003.553 ppm/cm: 7.97909

# Compound 2n

SpinWorks 4: IVA 2624 1H CDCI3

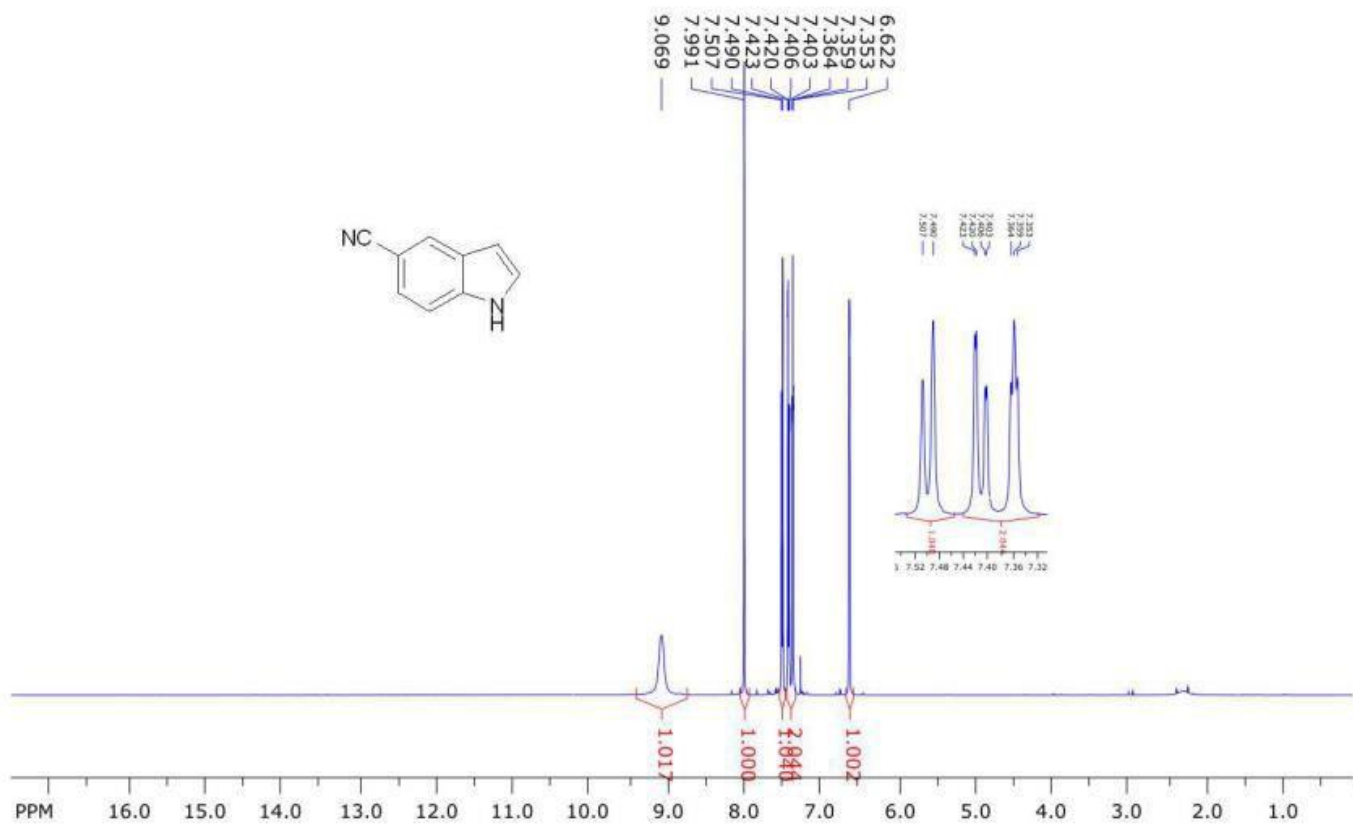

file: ...NMR\500-2\mkr12905\29 iva 2624\fid expt: <zg30>  
 transmitter freq.: 500.133001 MHz  
 time domain size: 65536 points  
 width: 12335.53 Hz = 24.6645 ppm = 0.188225 Hz/pt  
 number of scans: 24

freq. of 0 ppm: 500.130024 MHz  
 processed size: 65536 complex points  
 LB: 0.300 GF: 0.0000  
 Hz/cm: 349.870 ppm/cm: 0.69955



Compound 2n

SpinWorks 4: IVA 2624 13C CDCl3

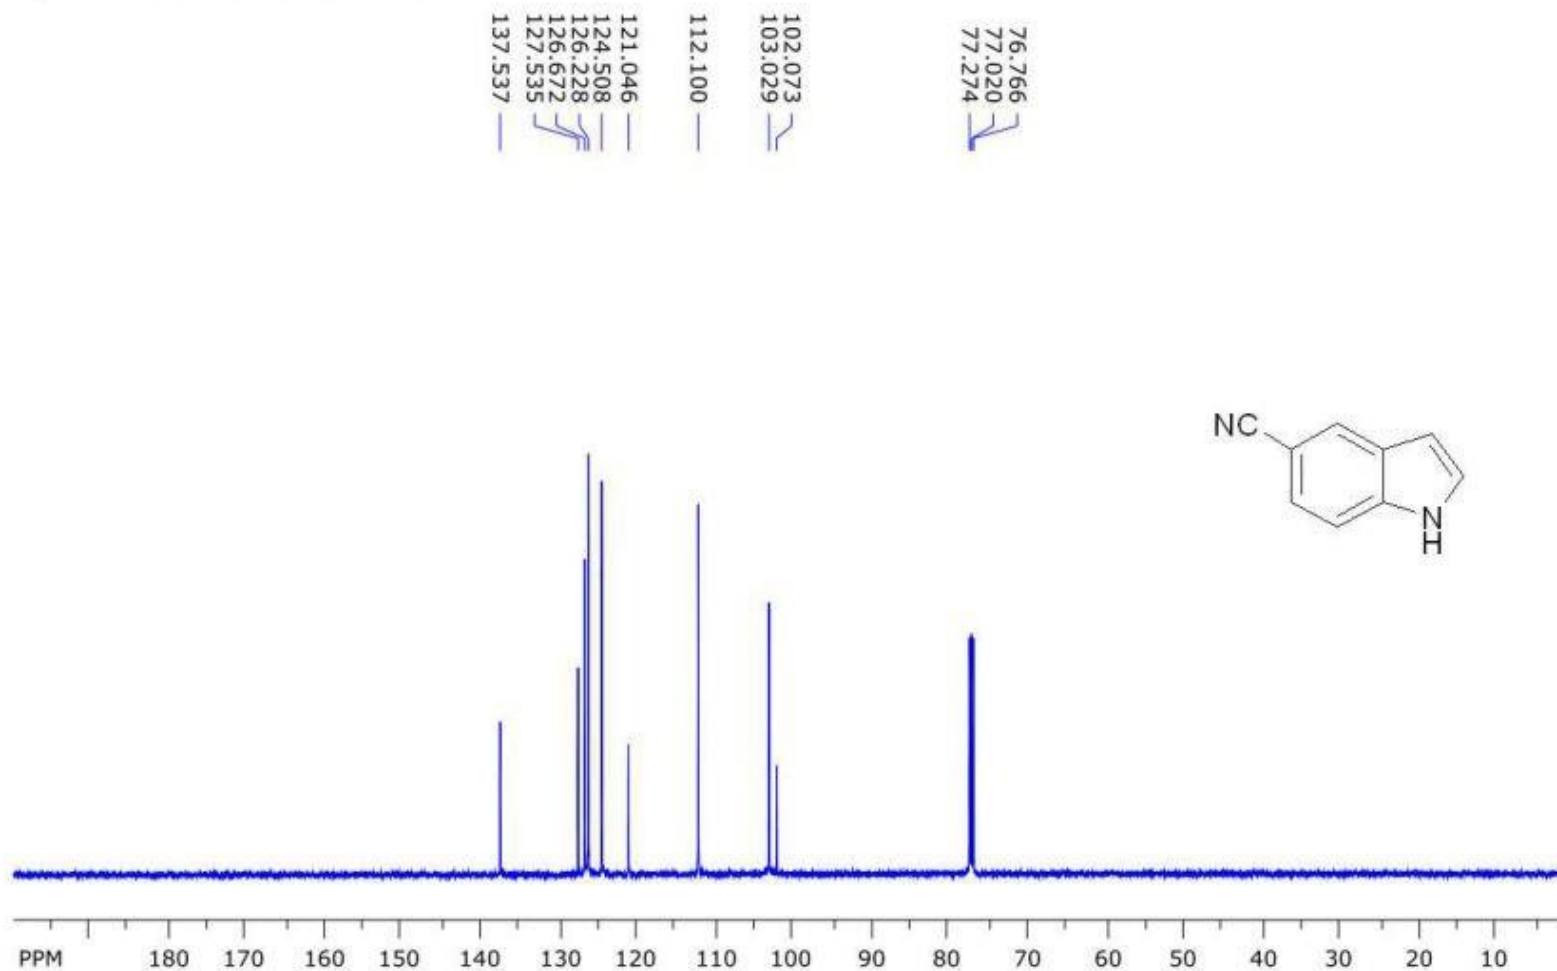

file: D:\NAPO\NMR\500-2\mkr12905\30\fid expt: <zggp30>  
 transmitter freq.: 125.772879 MHz  
 time domain size: 65536 points  
 width: 36057.69 Hz = 286.6889 ppm = 0.550197 Hz/pt  
 number of scans: 512

freq. of 0 ppm: 125.757813 MHz  
 processed size: 32768 complex points  
 LB: 2.000 GF: 0.0000  
 Hz/cm: 1000.362 ppm/cm: 7.95372

Compound 2o

SpinWorks 4: IVA 2626 1H CDCl3

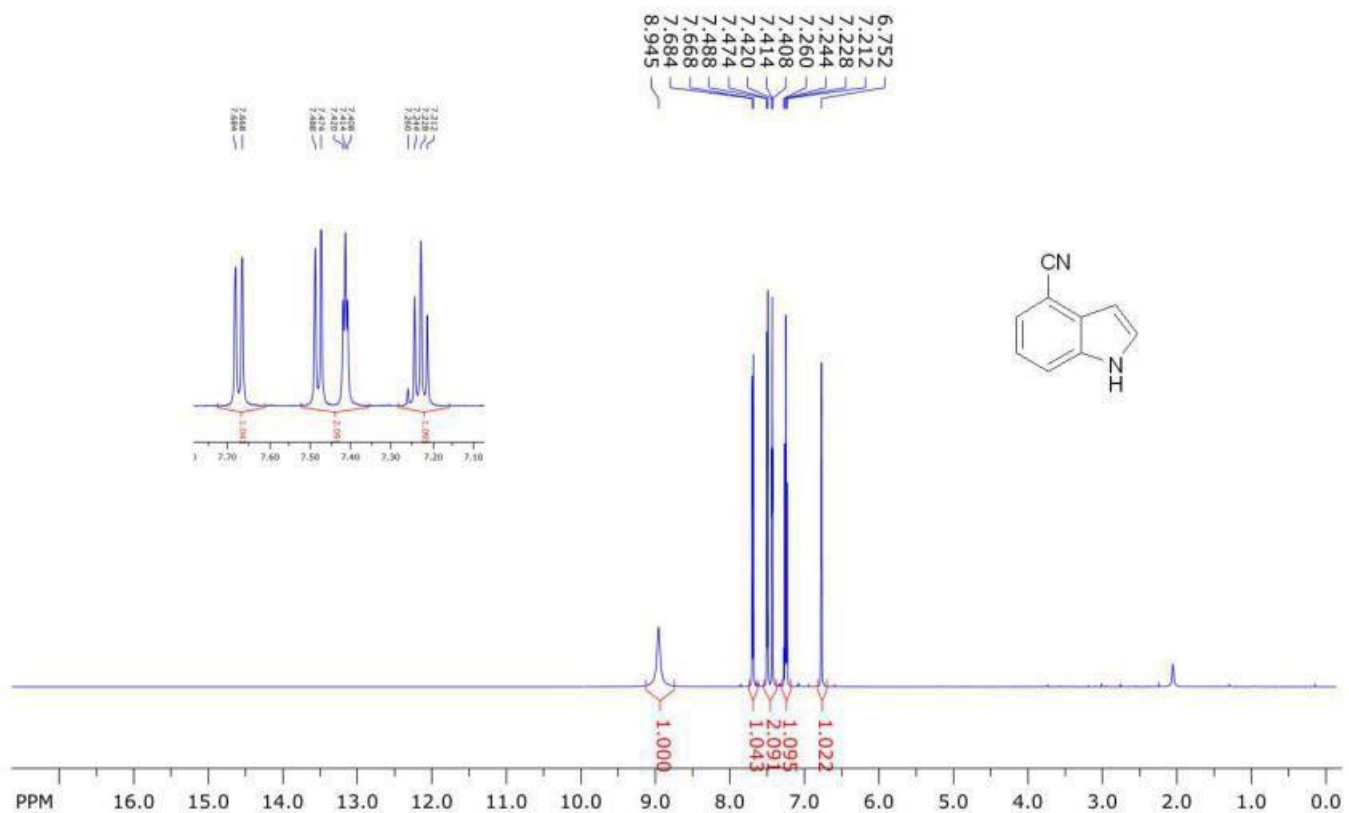

file: ...APO\NMR\500-2\mkr10706\11 2626\fid expt: <zg30>  
 transmitter freq.: 500.133001 MHz  
 time domain size: 65536 points  
 width: 12335.53 Hz = 24.6645 ppm = 0.188225 Hz/pt  
 number of scans: 24

freq. of 0 ppm: 500.130023 MHz  
 processed size: 65536 complex points  
 LB: 0.300 GF: 0.0000  
 Hz/cm: 356.966 ppm/cm: 0.71374

# Compound 2o

SpinWorks 4: IVA 2626 13C CDCL3

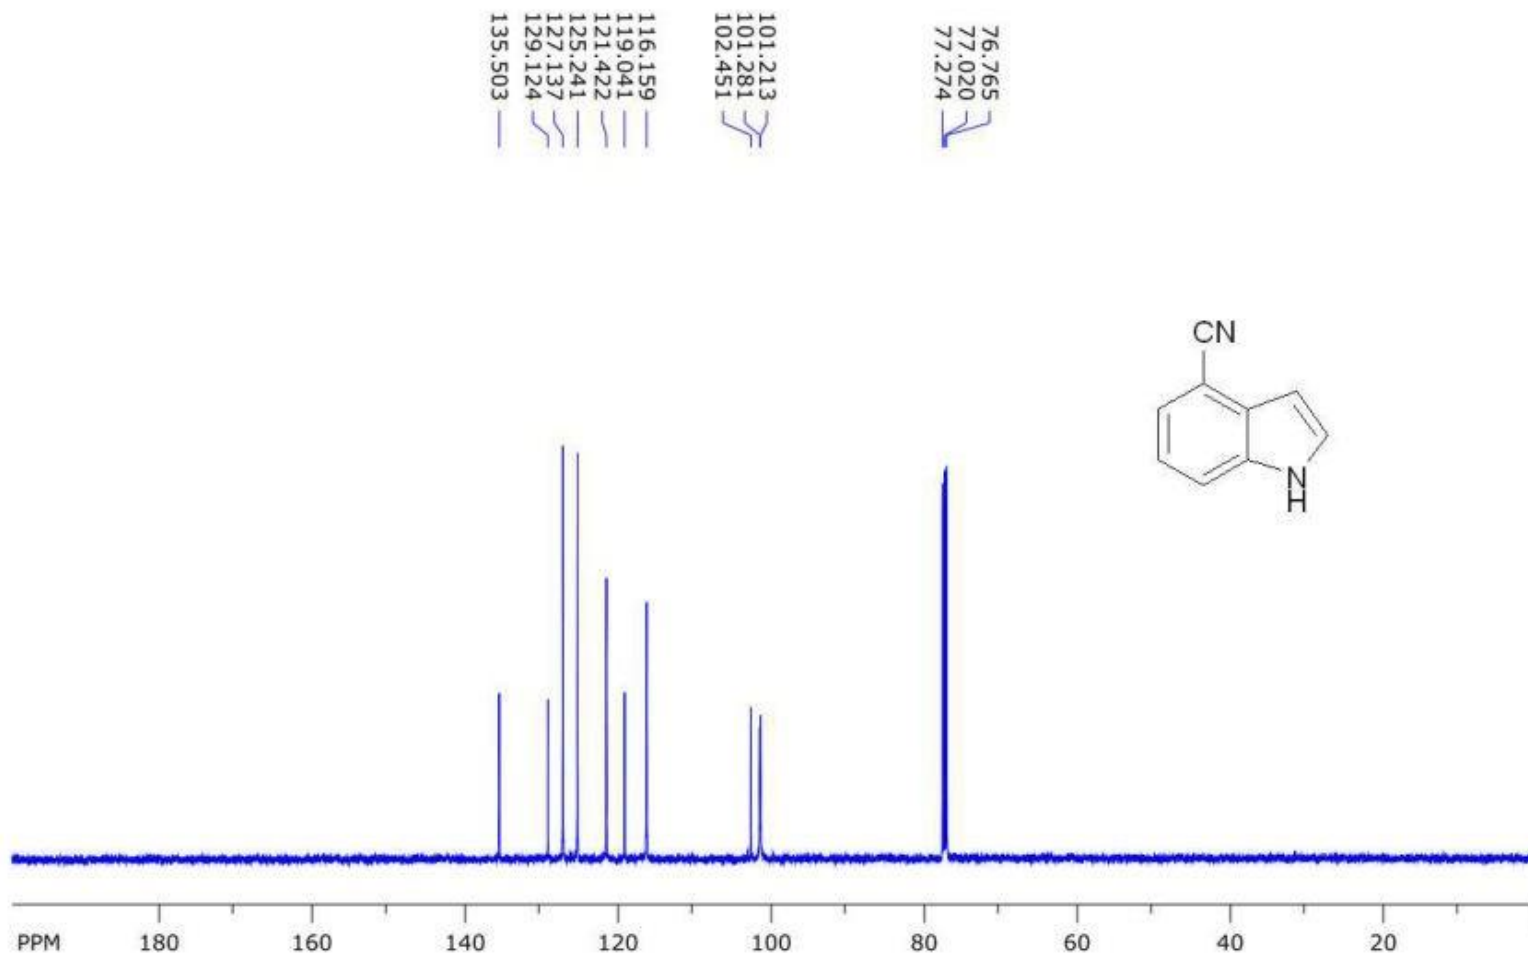

file: D:\NAPO\NMR\500-2\mkr10706\12\fid expt: <zgpg30>  
transmitter freq.: 125.772879 MHz  
time domain size: 65536 points  
width: 36057.69 Hz = 286.6889 ppm = 0.550197 Hz/pt  
number of scans: 512

freq. of 0 ppm: 125.757806 MHz  
processed size: 32768 complex points  
LB: 2.000 GF: 0.0000  
Hz/cm: 1006.744 ppm/cm: 8.00446

# Compound 4a

SpinWorks 4: IVA 1962 1H DMSO

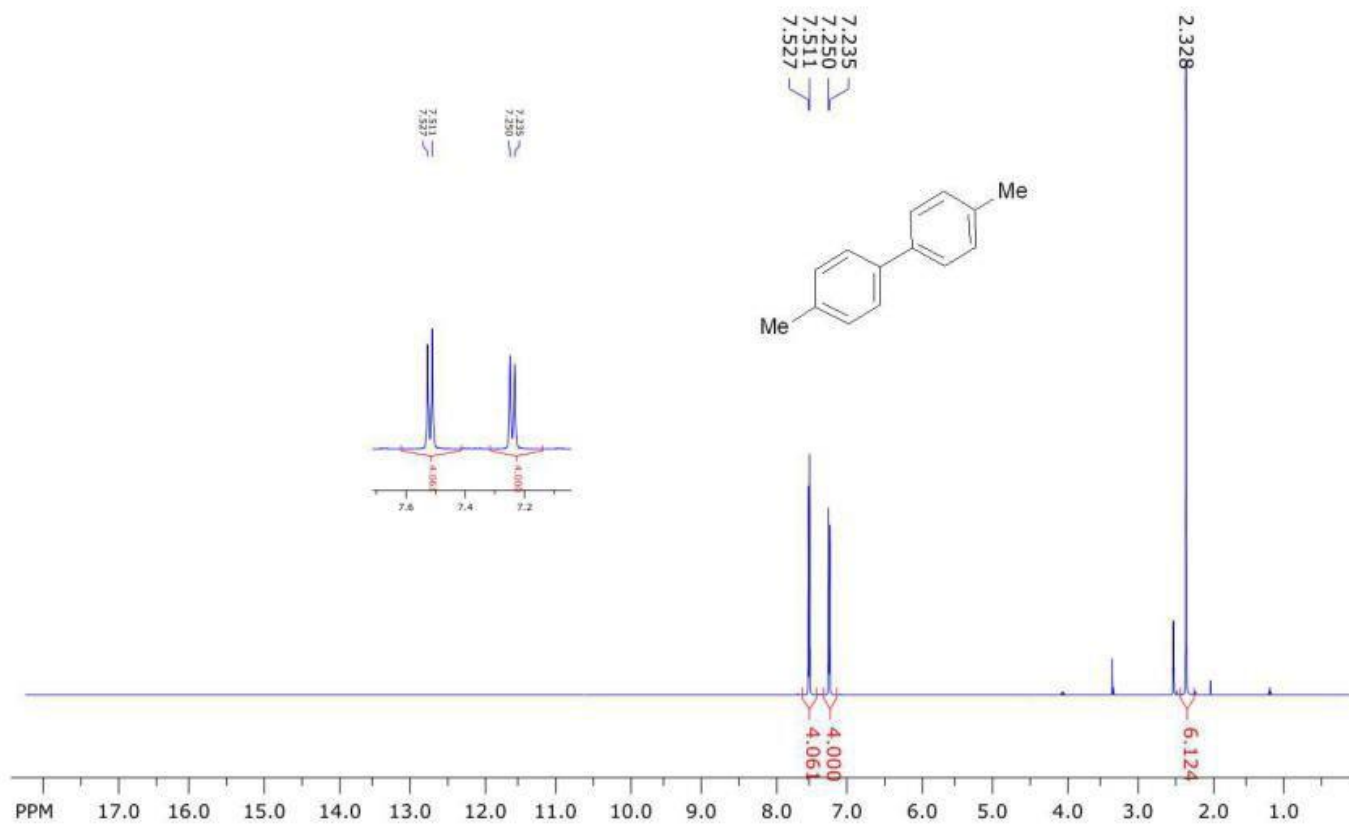

file: D:\NAPO\NMR\500-2\mkr10103\15\fid expt: <zg30>  
transmitter freq.: 500.133001 MHz  
time domain size: 65536 points  
width: 12335.53 Hz = 24.6645 ppm = 0.188225 Hz/pt  
number of scans: 24

freq. of 0 ppm: 500.130005 MHz  
processed size: 65536 complex points  
LB: 0.300 GF: 0.0000  
Hz/cm: 370.066 ppm/cm: 0.73993

# Compound 4a

SpinWorks 4: IVA 1962 13C DMSO

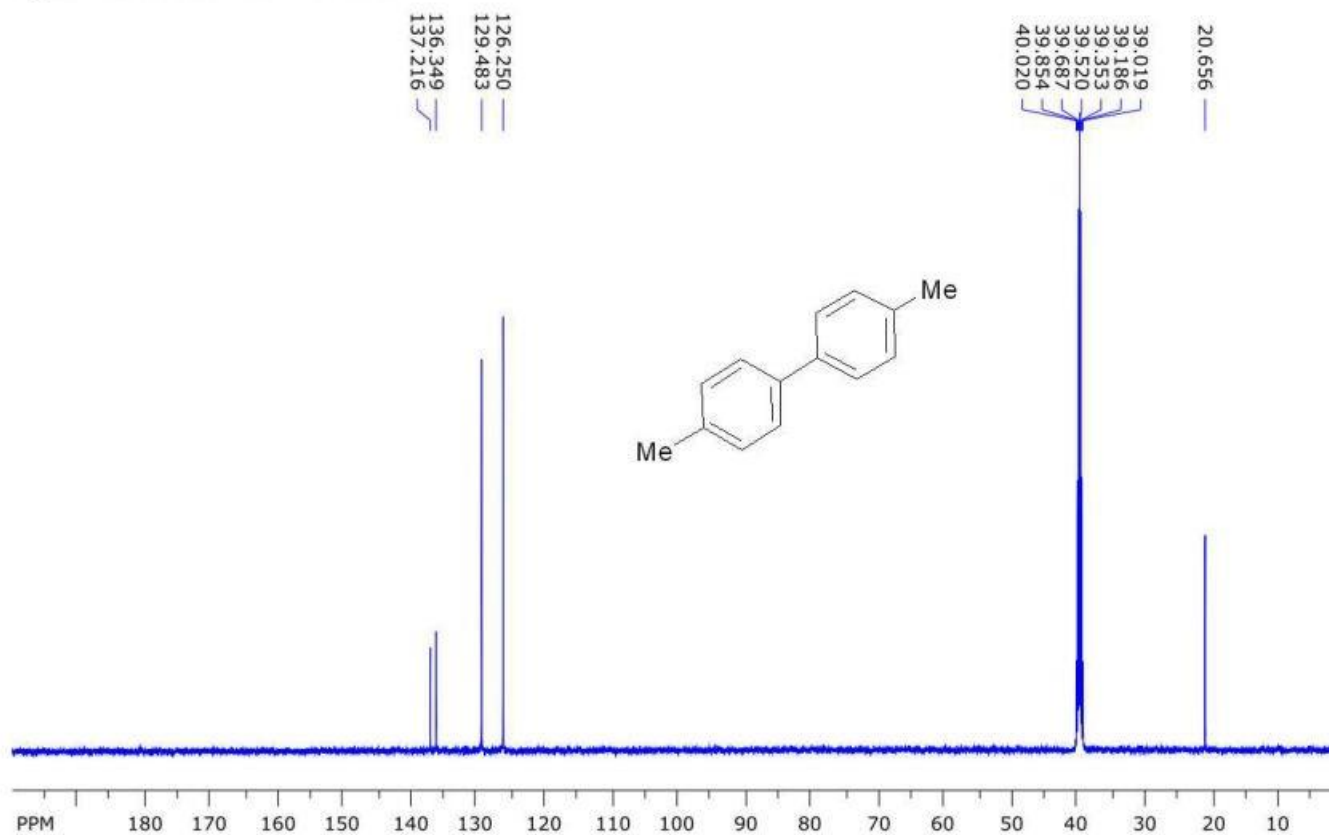

file: D:\NAPO\NMR\500-2\mkr10103\16\fid expt: <zgpg30>  
transmitter freq.: 125.772879 MHz  
time domain size: 65536 points  
width: 36057.69 Hz = 286.6889 ppm = 0.550197 Hz/pt  
number of scans: 512

freq. of 0 ppm: 125.757845 MHz  
processed size: 32768 complex points  
LB: 2.000 GF: 0.0000  
Hz/cm: 1001.957 ppm/cm: 7.96640

Compound **4b**

SpinWorks 4: IVA 1978 1H DMSO

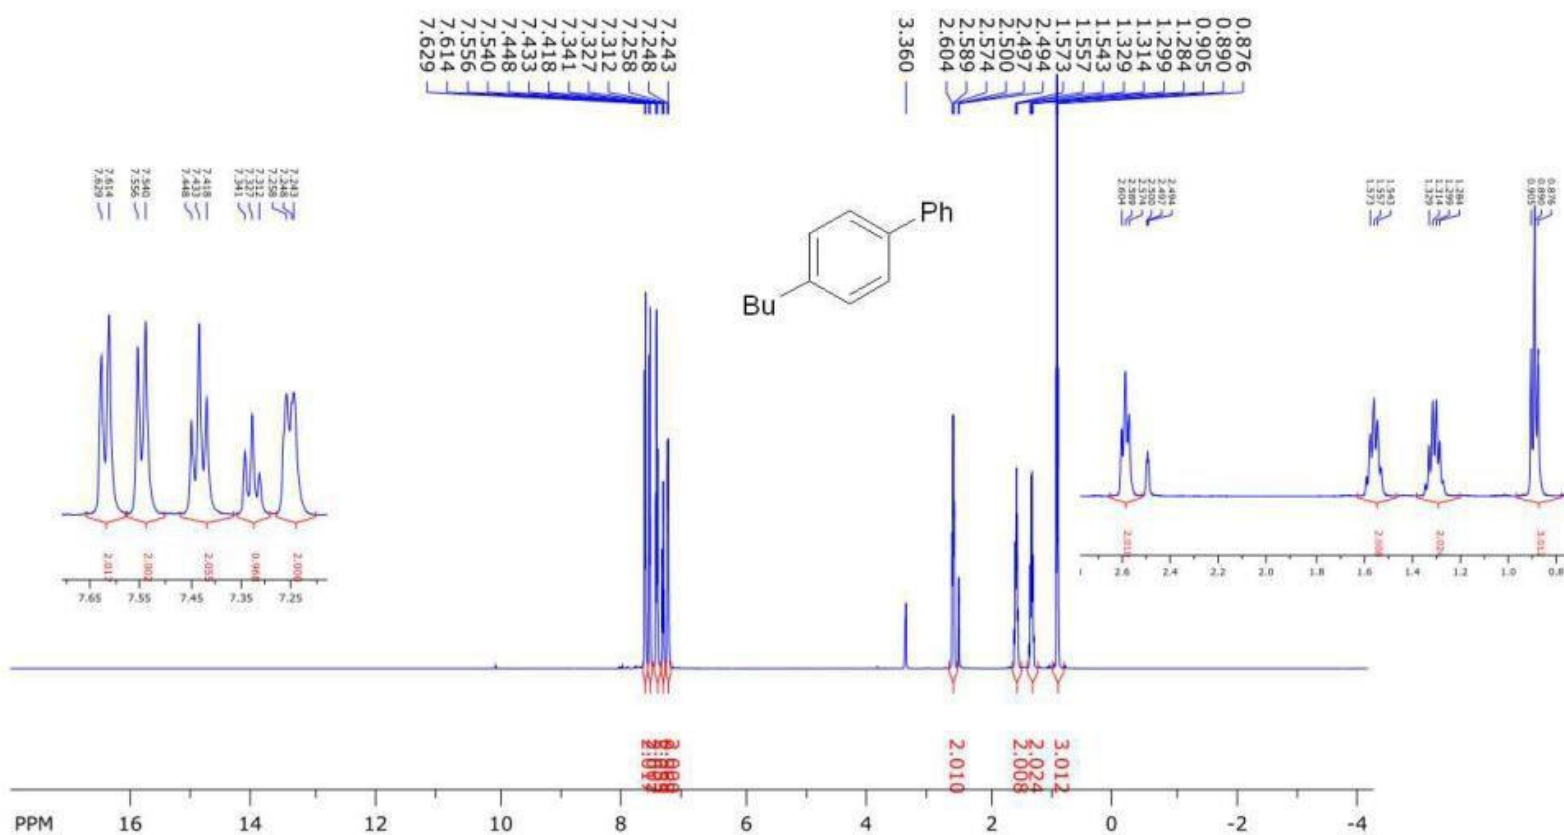

file: ...NAPO\NMR\500-2\mkr12406\9 1978\fid expt: <zg30>  
 transmitter freq.: 500.133001 MHz  
 time domain size: 65536 points  
 width: 12335.53 Hz = 24.6645 ppm = 0.188225 Hz/pt  
 number of scans: 24

freq. of 0 ppm: 500.130006 MHz  
 processed size: 65536 complex points  
 LB: 0.300 GF: 0.0000  
 Hz/cm: 443.751 ppm/cm: 0.88727

Compound **4b**

SpinWorks 4: IVA 1978 13C DMSO

126.448  
126.510  
127.088  
128.847  
137.552  
140.146  
141.572

13.776  
21.784  
33.111  
34.453  
39.186  
39.353  
39.520  
39.687  
39.854

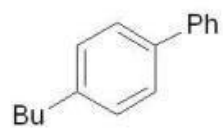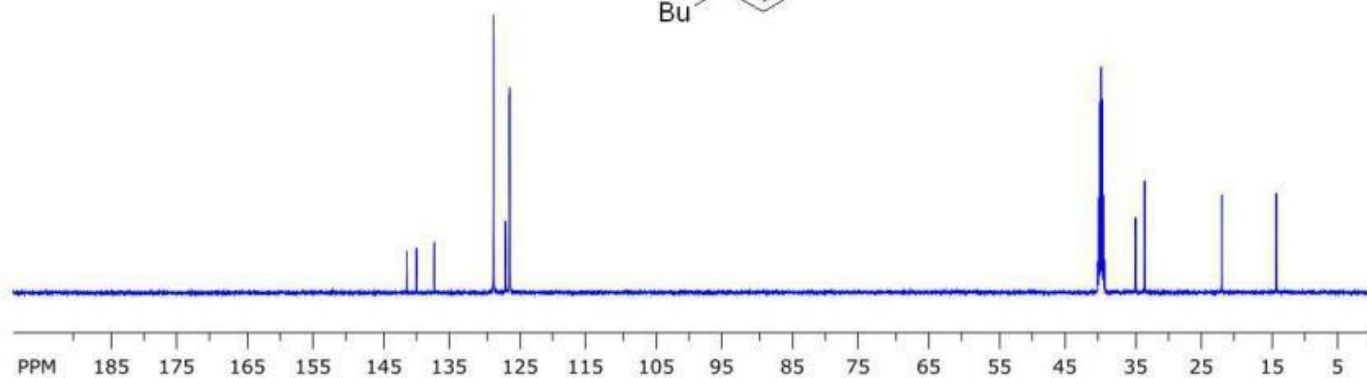

file: D:\NAPO\NMR\500-2\mkr12406\10\fid expt: <zgpg30>  
transmitter freq.: 125.772879 MHz  
time domain size: 65536 points  
width: 36057.69 Hz = 286.6889 ppm = 0.550197 Hz/pt  
number of scans: 512

freq. of 0 ppm: 125.757846 MHz  
processed size: 32768 complex points  
LB: 2.000 GF: 0.0000  
Hz/cm: 1003.553 ppm/cm: 7.97909

Compound 4c

SpinWorks 4: IVA 1959 1H DMSO

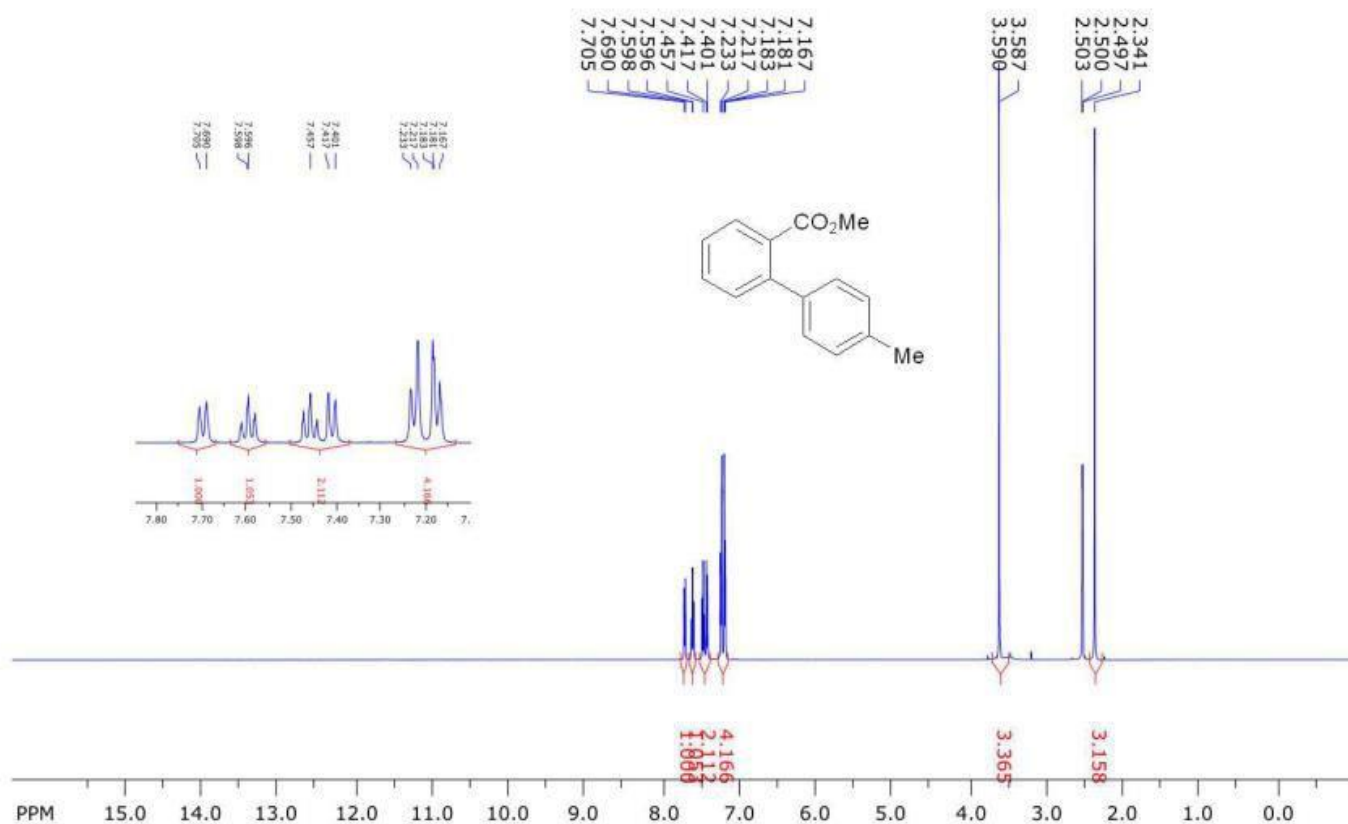

file: D:\NAPO\NMR\500-2\mkr11903\17\fid expt: <zg30>  
 transmitter freq.: 500.133001 MHz  
 time domain size: 65536 points  
 width: 12335.53 Hz = 24.6645 ppm = 0.188225 Hz/pt  
 number of scans: 24

freq. of 0 ppm: 500.130005 MHz  
 processed size: 65536 complex points  
 LB: 0.300 GF: 0.0000  
 Hz/cm: 350.962 ppm/cm: 0.70174



Compound 4c

SpinWorks 4: IVA 1959 13C DMSO

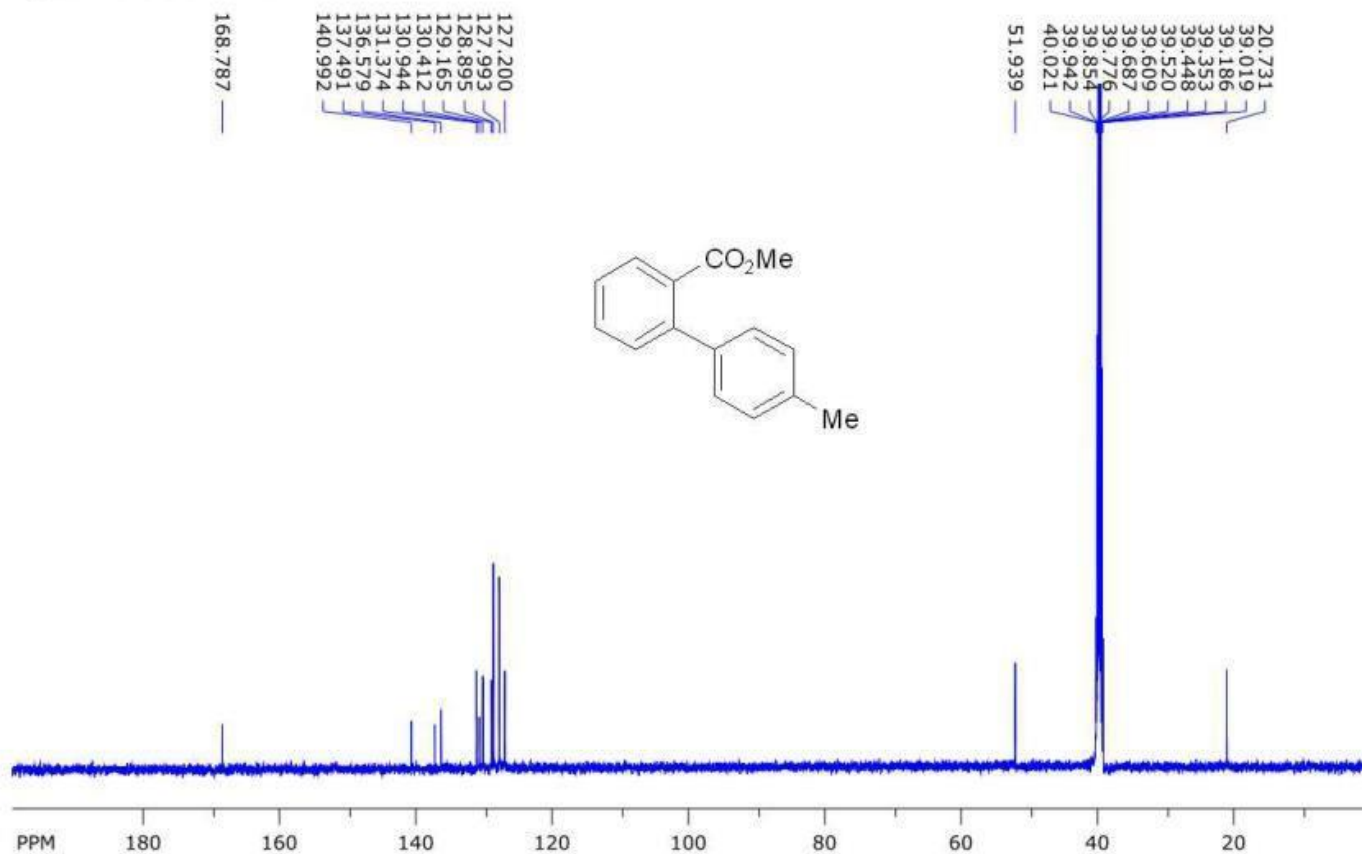

file: D:\NAPO\NMR\500-2\mkr11903\18\fid expt: <zgpg30>  
 transmitter freq.: 125.772879 MHz  
 time domain size: 65536 points  
 width: 36057.69 Hz = 286.6889 ppm = 0.550197 Hz/pt  
 number of scans: 512

freq. of 0 ppm: 125.757844 MHz  
 processed size: 32768 complex points  
 LB: 2.000 GF: 0.0000  
 Hz/cm: 1006.744 ppm/cm: 8.00446

# Compound 4d

SpinWorks 4: IVA 1531 1H CDCI3

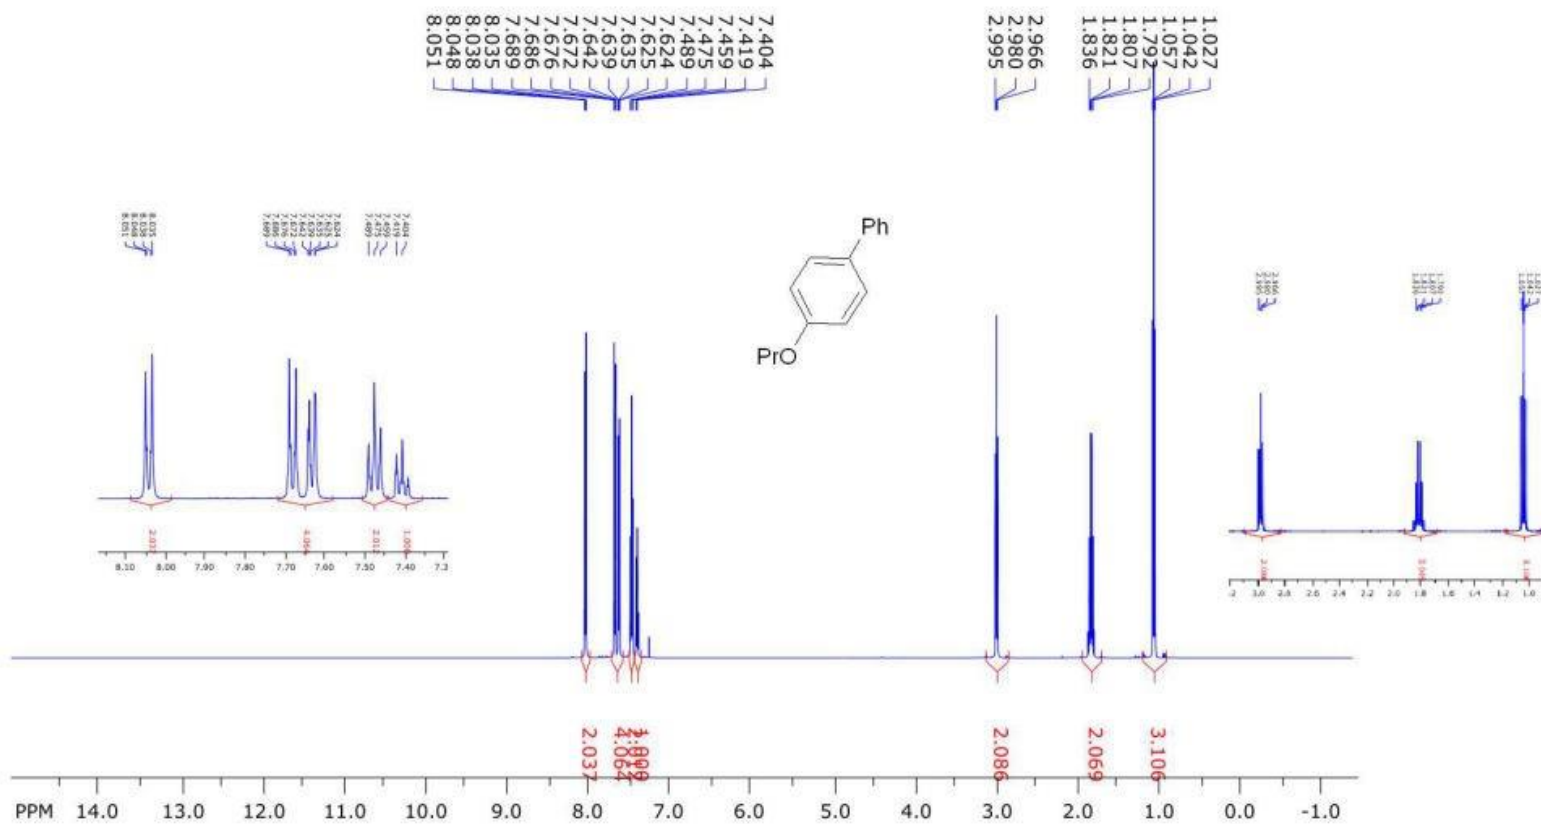

file: D:\NAPO\NMR\500-2\mkr21801\29\fid exp: <zg30>  
 transmitter freq.: 500.133001 MHz  
 time domain size: 65536 points  
 width: 12335.53 Hz = 24.6645 ppm = 0.188225 Hz/pt  
 number of scans: 24

freq. of 0 ppm: 500.130023 MHz  
 processed size: 65536 complex points  
 LB: 0.300 GF: 0.0000  
 Hz/cm: 330.767 ppm/cm: 0.66136

Compound **4d**

SpinWorks 4: IVA 1531 13C CDCI3

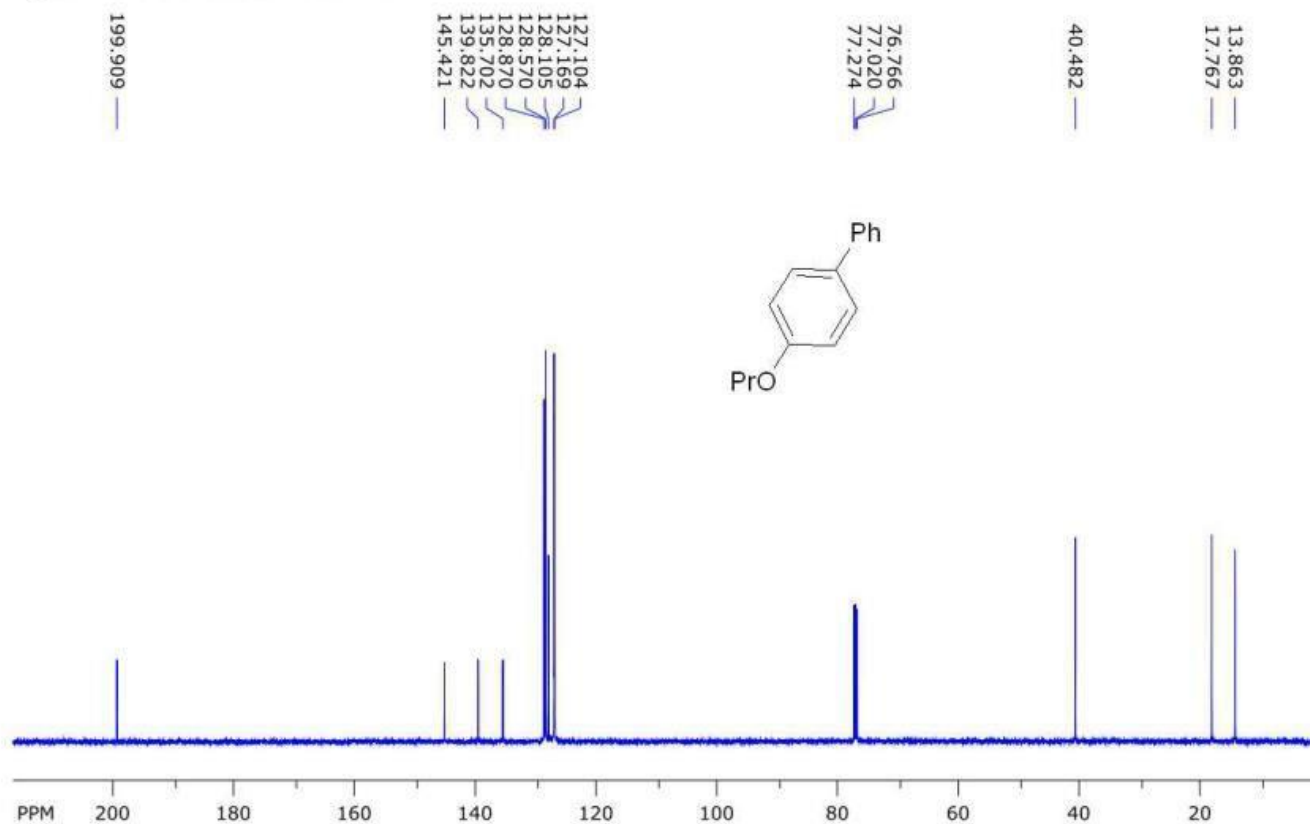

file: D:\NAPO\NMR\500-2\mkr21801\30\fid exp: <zpgg30>  
 transmitter freq.: 125.772879 MHz  
 time domain size: 65536 points  
 width: 36057.69 Hz = 286.6889 ppm = 0.550197 Hz/pt  
 number of scans: 256

freq. of 0 ppm: 125.757804 MHz  
 processed size: 32768 complex points  
 LB: 2.000 GF: 0.0000  
 Hz/cm: 1094.495 ppm/cm: 8.70215

Compound **4e**

SpinWorks 4: IVA 1928 1h DMSO

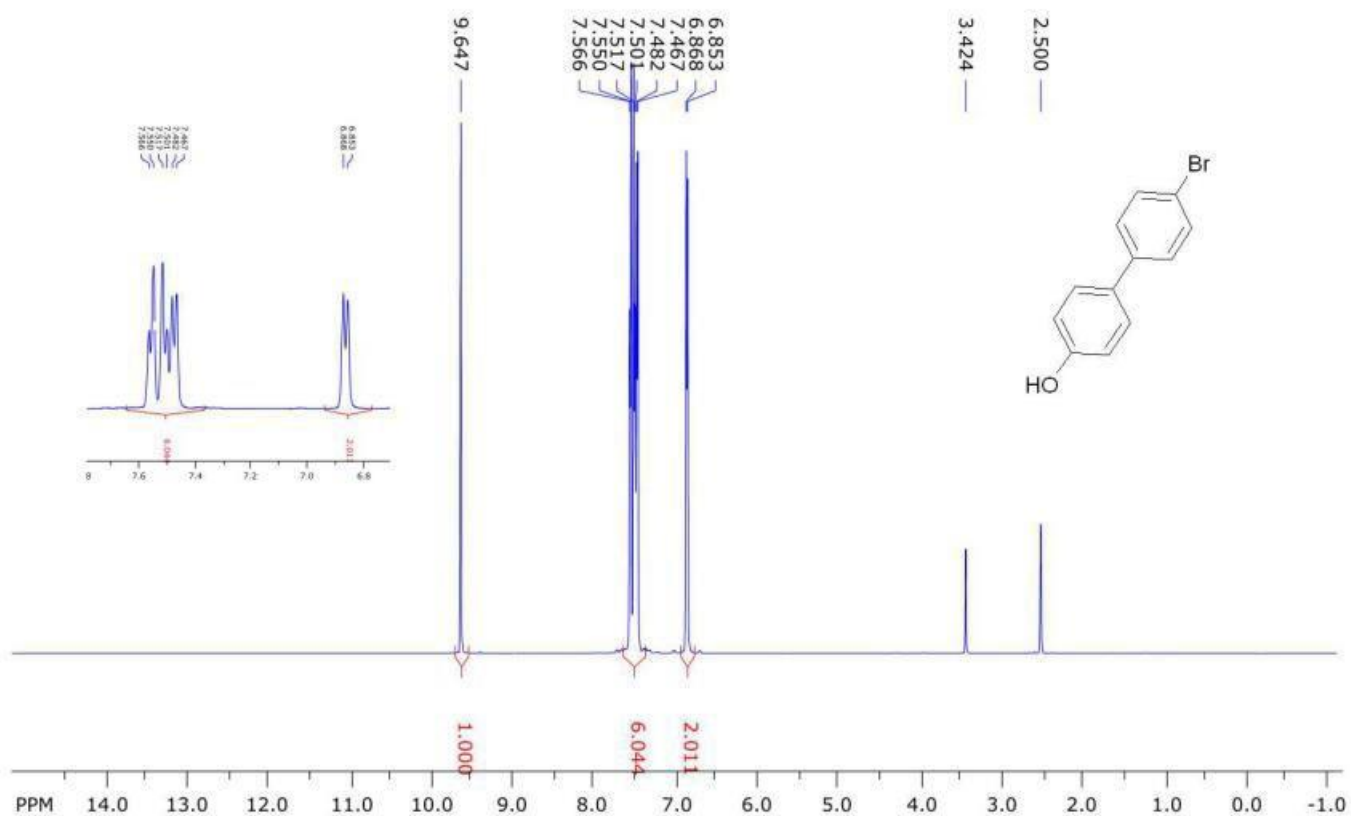

file: D:\NAPO\NMR\500-2\mkr11305\11\fid expt: <zg30>  
 transmitter freq.: 500.133001 MHz  
 time domain size: 65536 points  
 width: 12335.53 Hz = 24.6645 ppm = 0.188225 Hz/pt  
 number of scans: 24

freq. of 0 ppm: 500.130004 MHz  
 processed size: 65536 complex points  
 LB: 0.300 GF: 0.0000  
 Hz/cm: 326.946 ppm/cm: 0.65372

Compound **4e**

SpinWorks 4: IVA 1928 13C DMSO

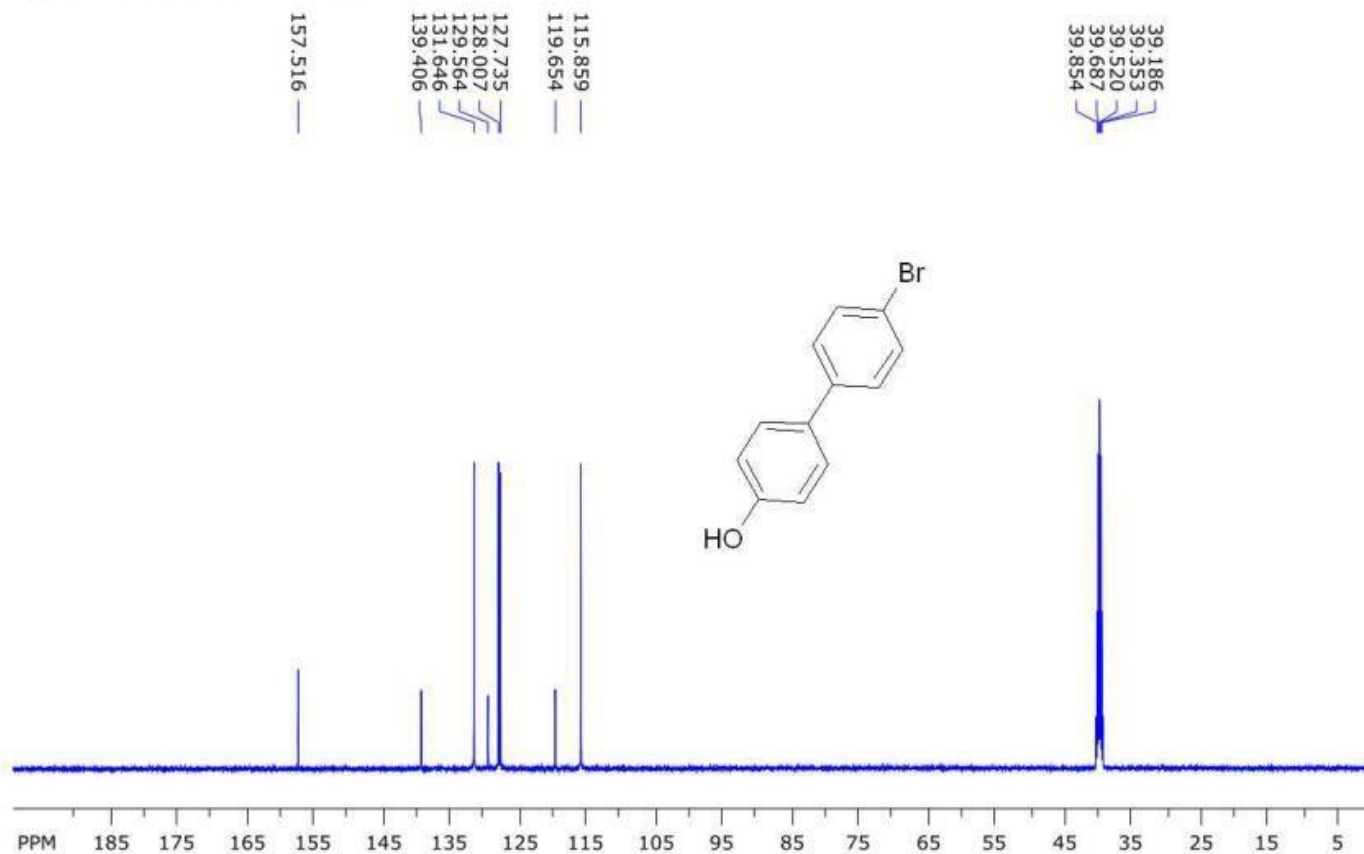

file: D:\NAPO\NMR\500-2\mkr11305\12\fid exp: <zggp30>  
 transmitter freq.: 125.772879 MHz  
 time domain size: 65536 points  
 width: 36057.69 Hz = 286.6889 ppm = 0.550197 Hz/pt  
 number of scans: 512

freq. of 0 ppm: 125.757842 MHz  
 processed size: 32768 complex points  
 LB: 2.000 GF: 0.0000  
 Hz/cm: 1005.148 ppm/cm: 7.99177

# Compound 4f

SpinWorks 4: IVA 1529 1H CDCI3

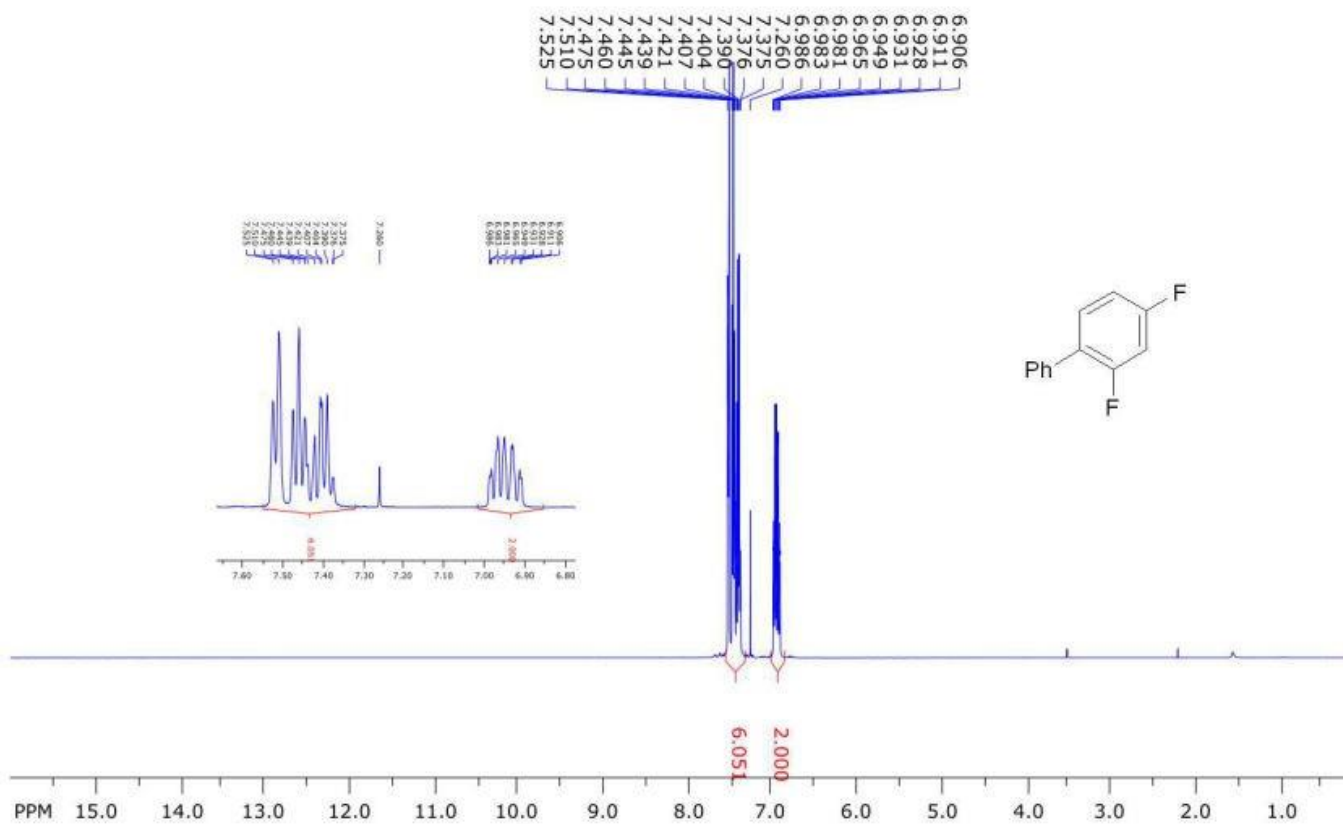

file: D:\NAPO\NMR\500-2\mkr100201\21\fid expt: <zg30>  
 transmitter freq.: 500.133001 MHz  
 time domain size: 65536 points  
 width: 12335.53 Hz = 24.6645 ppm = 0.188225 Hz/pt  
 number of scans: 24

freq. of 0 ppm: 500.130023 MHz  
 processed size: 65536 complex points  
 LB: 0.300 GF: 0.0000  
 Hz/cm: 318.759 ppm/cm: 0.63735

# Compound 4f

SpinWorks 4: IVA 1529 13C CDCL3

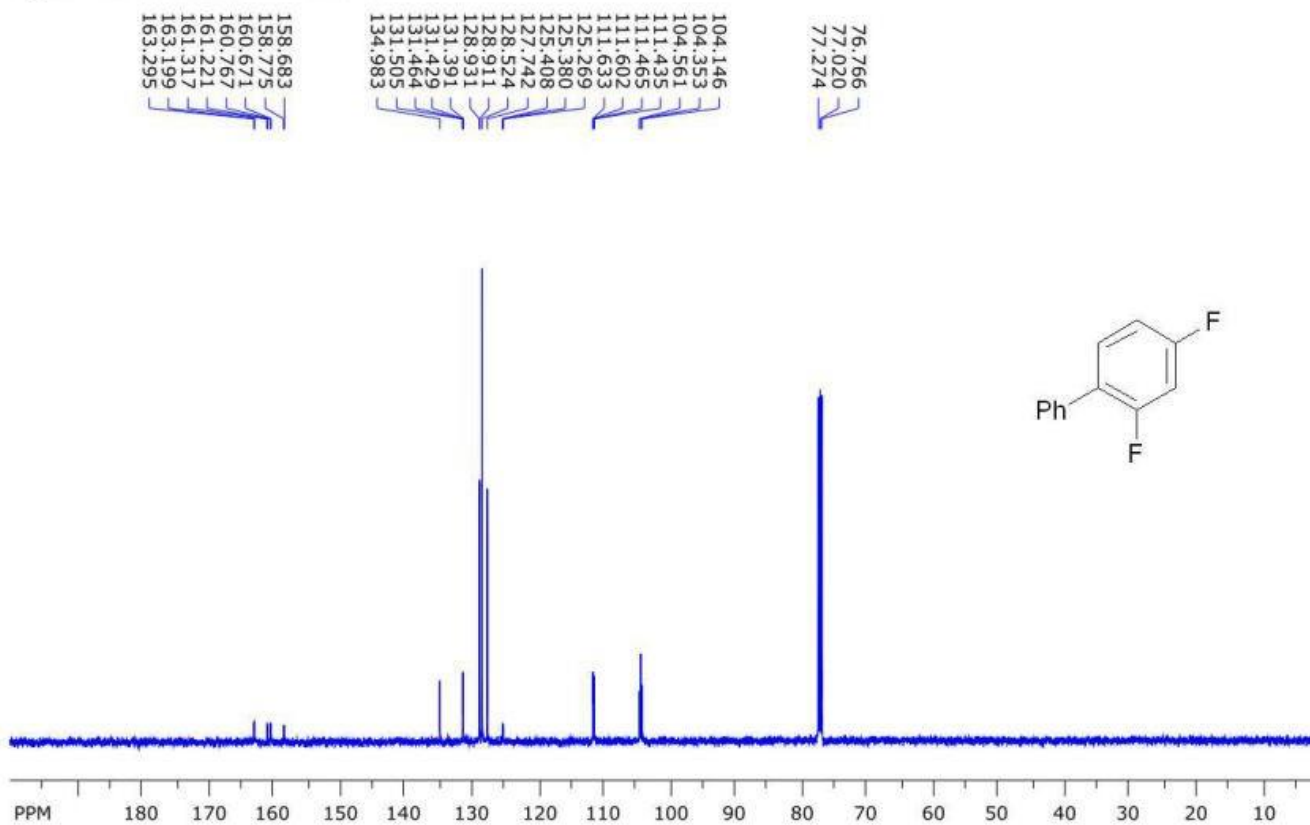

file: D:\NAPO\NMR\500-2\mkr100201\22\fid expt: <zgpg30>  
 transmitter freq.: 125.772879 MHz  
 time domain size: 65536 points  
 width: 36057.69 Hz = 286.6889 ppm = 0.550197 Hz/pt  
 number of scans: 512

freq. of 0 ppm: 125.757793 MHz  
 processed size: 32768 complex points  
 LB: 2.000 GF: 0.0000  
 Hz/cm: 1001.957 ppm/cm: 7.96640

Compound 4g

SpinWorks 4: IVA 1942 1H CDCl3

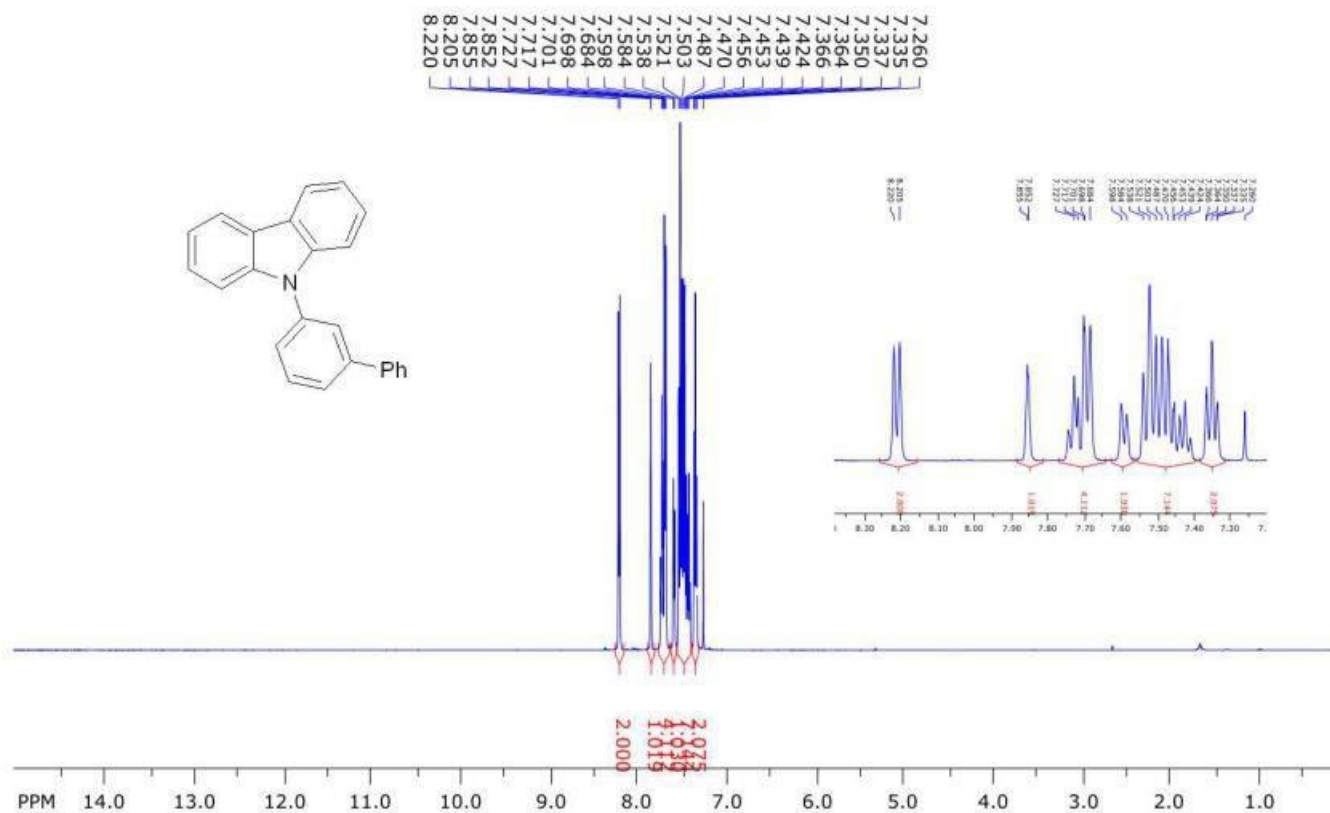

file: D:\NAPO\NMR\500-2\mkr12102\39\fid expt: <zg30>  
 transmitter freq.: 500.133001 MHz  
 time domain size: 65536 points  
 width: 12335.53 Hz = 24.6645 ppm = 0.188225 Hz/pt  
 number of scans: 24

freq. of 0 ppm: 500.130023 MHz  
 processed size: 65536 complex points  
 LB: 0.300 GF: 0.0000  
 Hz/cm: 300.201 ppm/cm: 0.60024



# Compound 4g

SpinWorks 4: IVA 1942 13c CDCl3

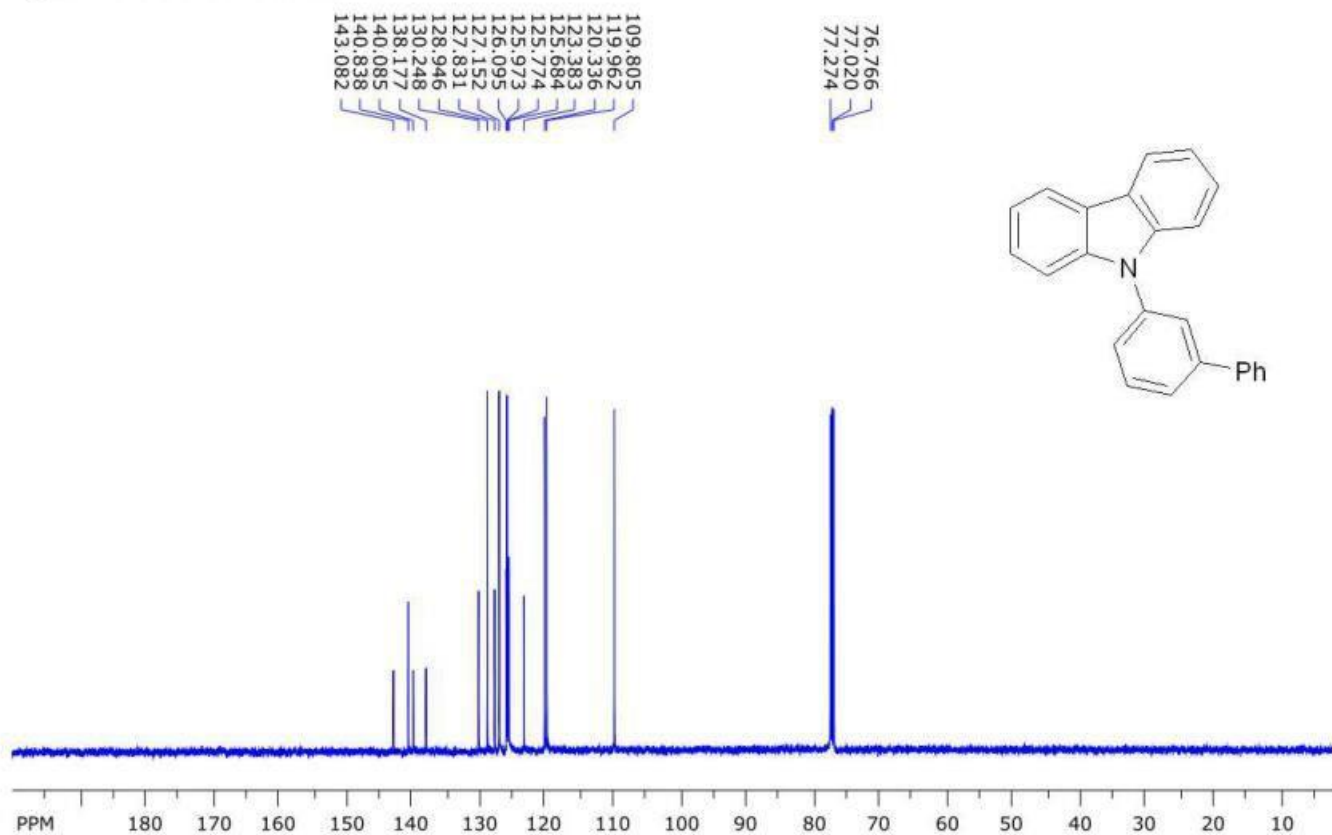

file: D:\NAPO\NMR\500-2\mkr12102\40\fid expt: <zgpg30>  
transmitter freq.: 125.772879 MHz  
time domain size: 65536 points  
width: 36057.69 Hz = 286.6889 ppm = 0.550197 Hz/pt  
number of scans: 512

freq. of 0 ppm: 125.757800 MHz  
processed size: 32768 complex points  
LB: 2.000 GF: 0.0000  
Hz/cm: 1001.957 ppm/cm: 7.96640

Compound **4h**

SpinWorks 4: IVA 2575 1H DMSO

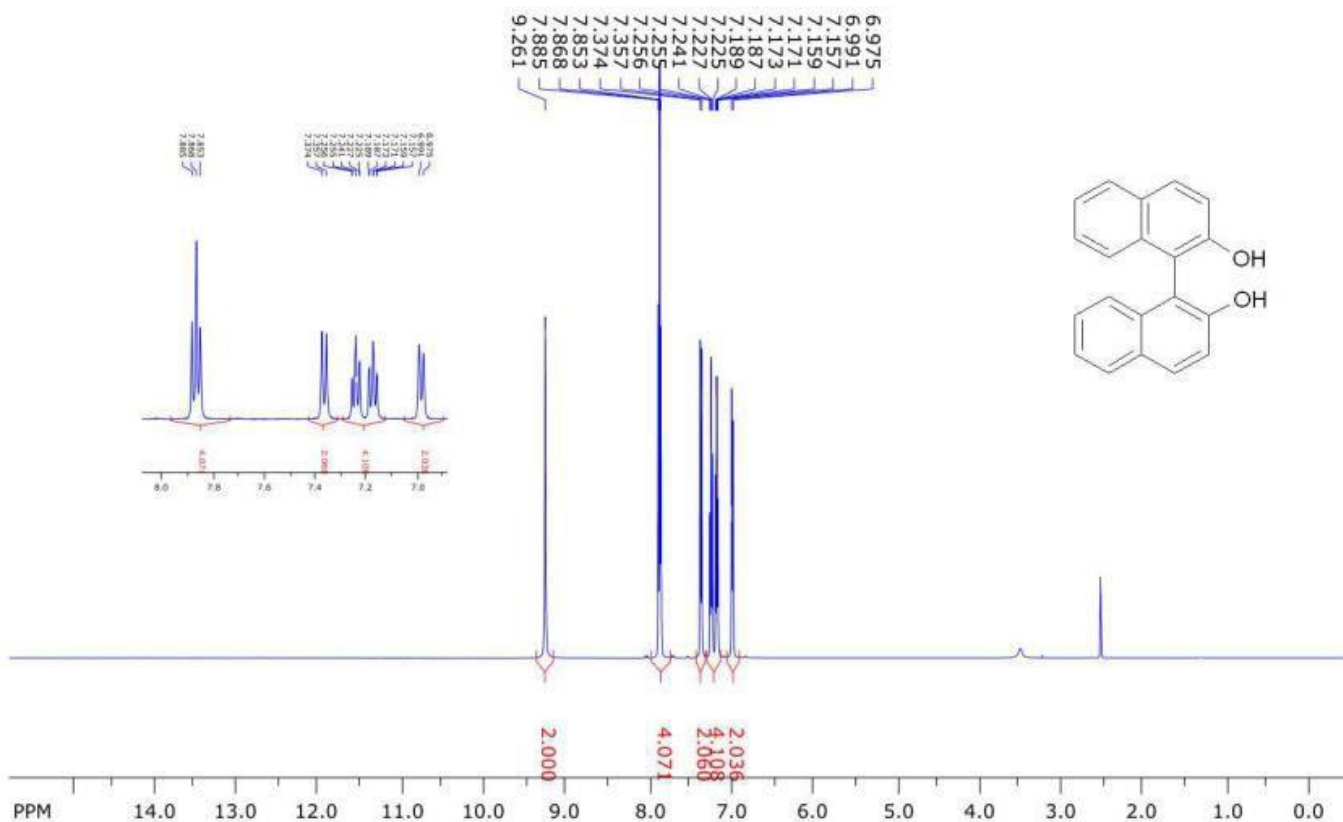

file: ...APO\NMR\500-2\mkr12506\23 2575\fid expt: <zg30>  
 transmitter freq.: 500.133001 MHz  
 time domain size: 65536 points  
 width: 12335.53 Hz = 24.6645 ppm = 0.188225 Hz/pt  
 number of scans: 24

freq. of 0 ppm: 500.130004 MHz  
 processed size: 65536 complex points  
 LB: 0.300 GF: 0.0000  
 Hz/cm: 326.946 ppm/cm: 0.65372

Compound **4h**

SpinWorks 4: IVA 2575 13C DMSO

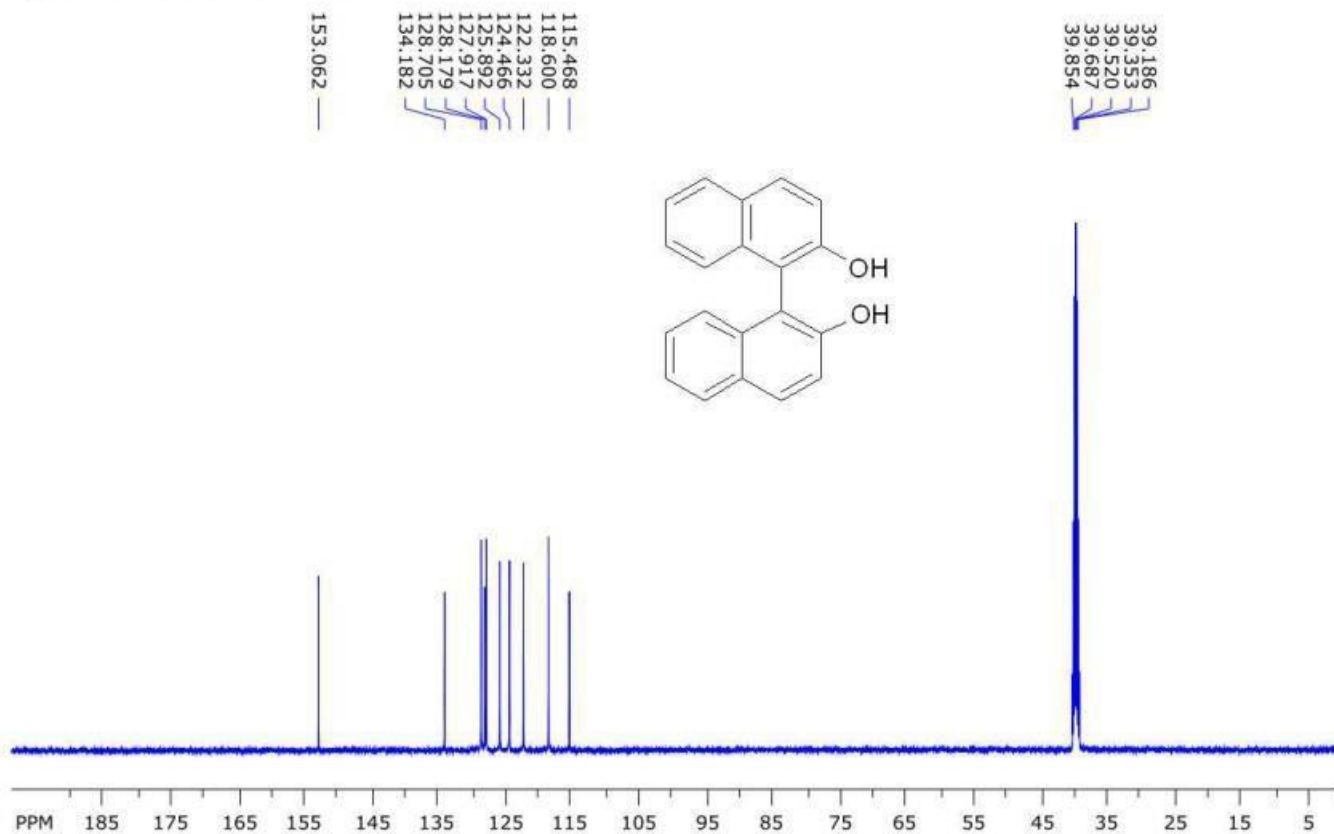

file: D:\NAPO\NMR\500-2\mkr12506\24\fid expt: <zgpg30>  
 transmitter freq.: 125.772879 MHz  
 time domain size: 65536 points  
 width: 36057.69 Hz = 286.6889 ppm = 0.550197 Hz/pt  
 number of scans: 512

freq. of 0 ppm: 125.757842 MHz  
 processed size: 32768 complex points  
 LB: 2.000 GF: 0.0000  
 Hz/cm: 998.766 ppm/cm: 7.94103

# Compound 4i

SpinWorks 4: IVA 1409 1H CDCI3

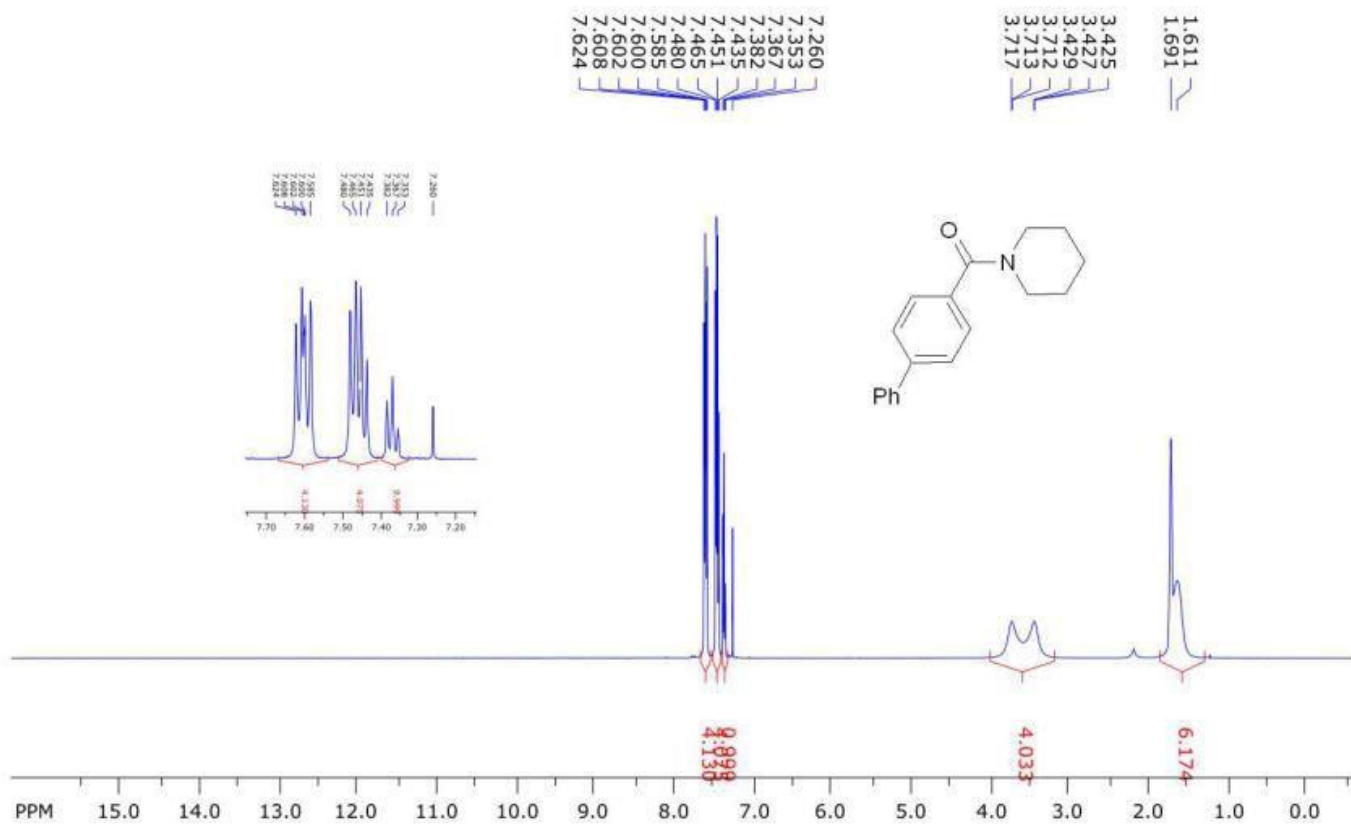

file: D:\NAPO\NMR\500-2\mkr11112\3\fid exp: <zg30>  
 transmitter freq.: 500.133001 MHz  
 time domain size: 65536 points  
 width: 12335.53 Hz = 24.6645 ppm = 0.188225 Hz/pt  
 number of scans: 12

freq. of 0 ppm: 500.130023 MHz  
 processed size: 65536 complex points  
 LB: 0.300 GF: 0.0000  
 Hz/cm: 341.137 ppm/cm: 0.68209

Compound 4i

SpinWorks 4: IVA 1409 13C CDCl3

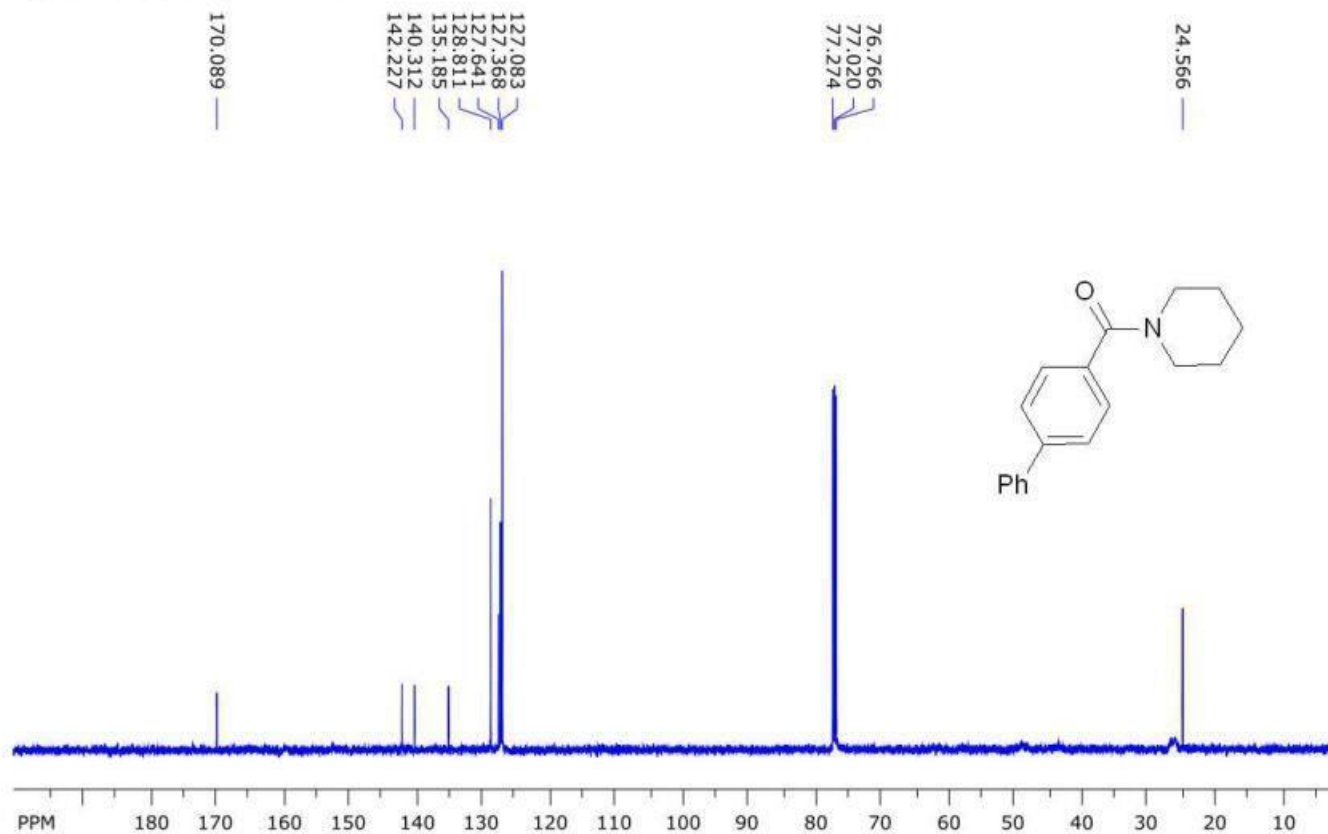

file: D:\NAPO\NMR\500-2\mkr11112\4\fid exp: <zgpg30>  
 transmitter freq.: 125.772879 MHz  
 time domain size: 65536 points  
 width: 36057.69 Hz = 286.6889 ppm = 0.550197 Hz/pt  
 number of scans: 196

freq. of 0 ppm: 125.757800 MHz  
 processed size: 32768 complex points  
 LB: 2.000 GF: 0.0000  
 Hz/cm: 1003.553 ppm/cm: 7.97909

# Compound 4j

SpinWorks 4: IVA 2064 1H DMSO

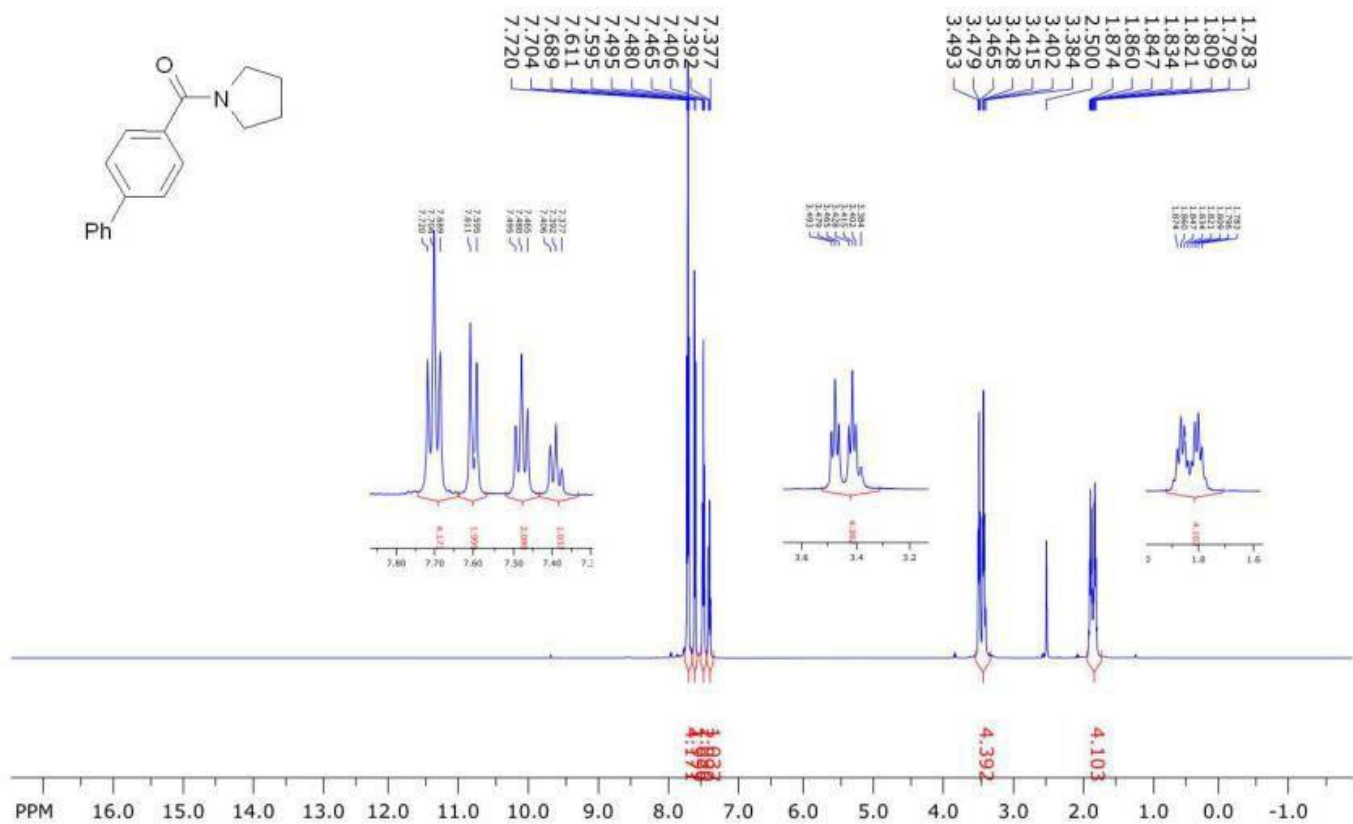

file: ...APO\NMR\500-2\mkr12607\27 2064\fid expt: <zg30>  
 transmitter freq.: 500.133001 MHz  
 time domain size: 65536 points  
 width: 12335.53 Hz = 24.6645 ppm = 0.188225 Hz/pt  
 number of scans: 24

freq. of 0 ppm: 500.130005 MHz  
 processed size: 65536 complex points  
 LB: 0.300 GF: 0.0000  
 Hz/cm: 389.715 ppm/cm: 0.77922

# Compound 4j

SpinWorks 4: IVA 2064 13C DMSO

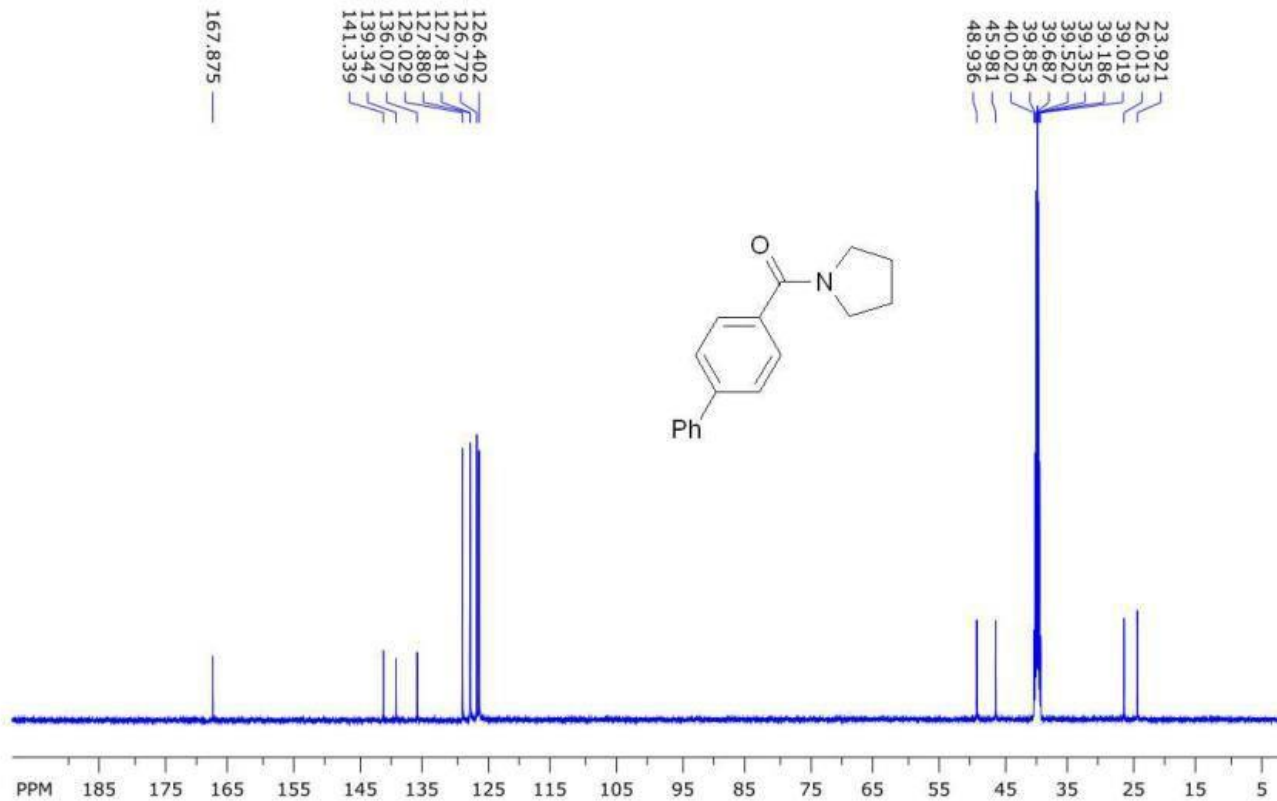

file: D:\NAPO\NMR\500-2\mkr12607\28\fid expt: <zpgp30>  
 transmitter freq.: 125.772879 MHz  
 time domain size: 65536 points  
 width: 36057.69 Hz = 286.6889 ppm = 0.550197 Hz/pt  
 number of scans: 512

freq. of 0 ppm: 125.757845 MHz  
 processed size: 32768 complex points  
 LB: 2.000 GF: 0.0000  
 Hz/cm: 998.766 ppm/cm: 7.94103

Compound **4k**

SpinWorks 4: IVA 1996 1H DMSO

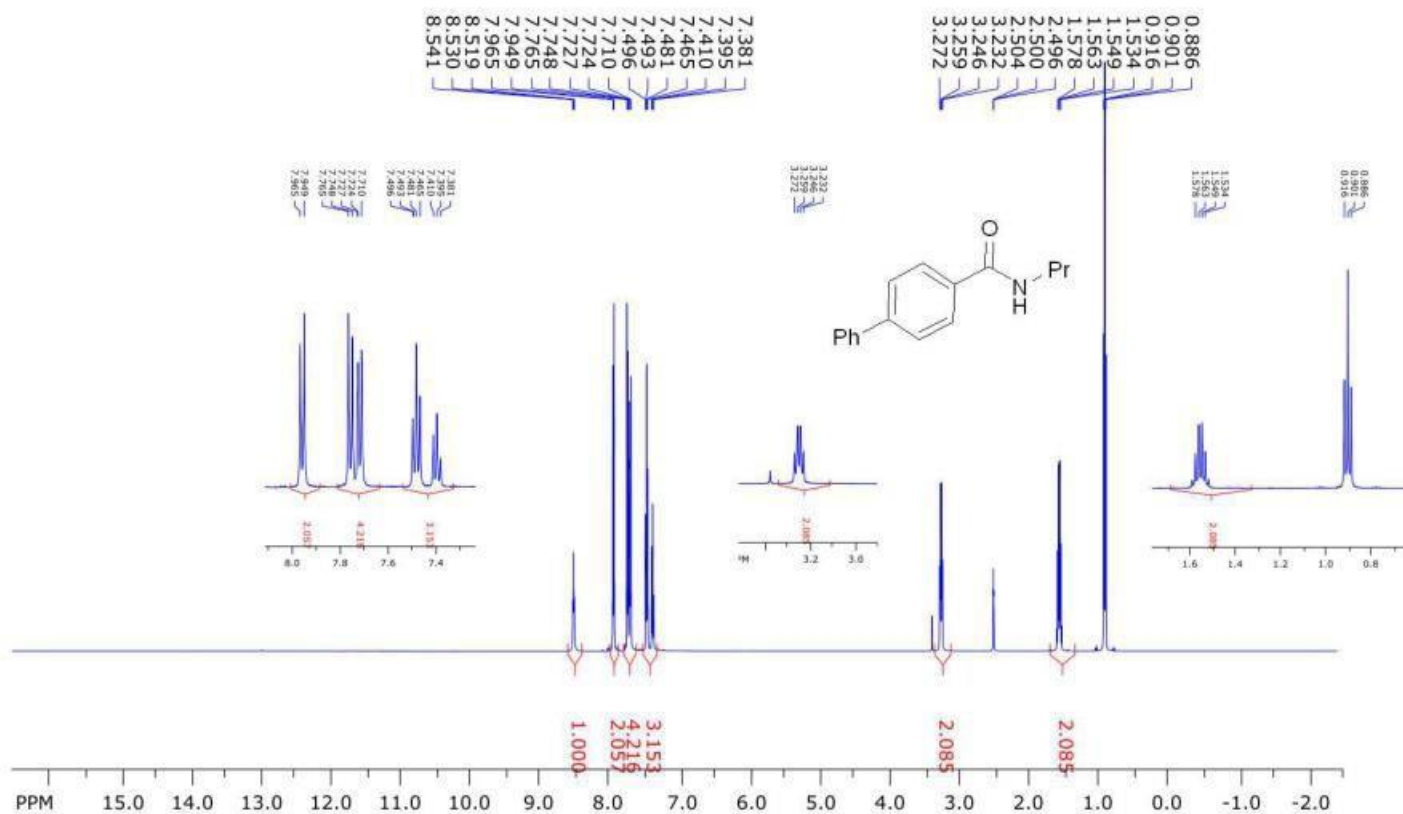

file: D:\NAPO\NMR\500-2\mkr10804\9\fid exp: <zg30>  
 transmitter freq.: 500.133001 MHz  
 time domain size: 65536 points  
 width: 12335.53 Hz = 24.6645 ppm = 0.188225 Hz/pt  
 number of scans: 24

freq. of 0 ppm: 500.130005 MHz  
 processed size: 65536 complex points  
 LB: 0.300 GF: 0.0000  
 Hz/cm: 380.982 ppm/cm: 0.76176



Compound **4k**

SpinWorks 4: IVA 1996 13C DMSO

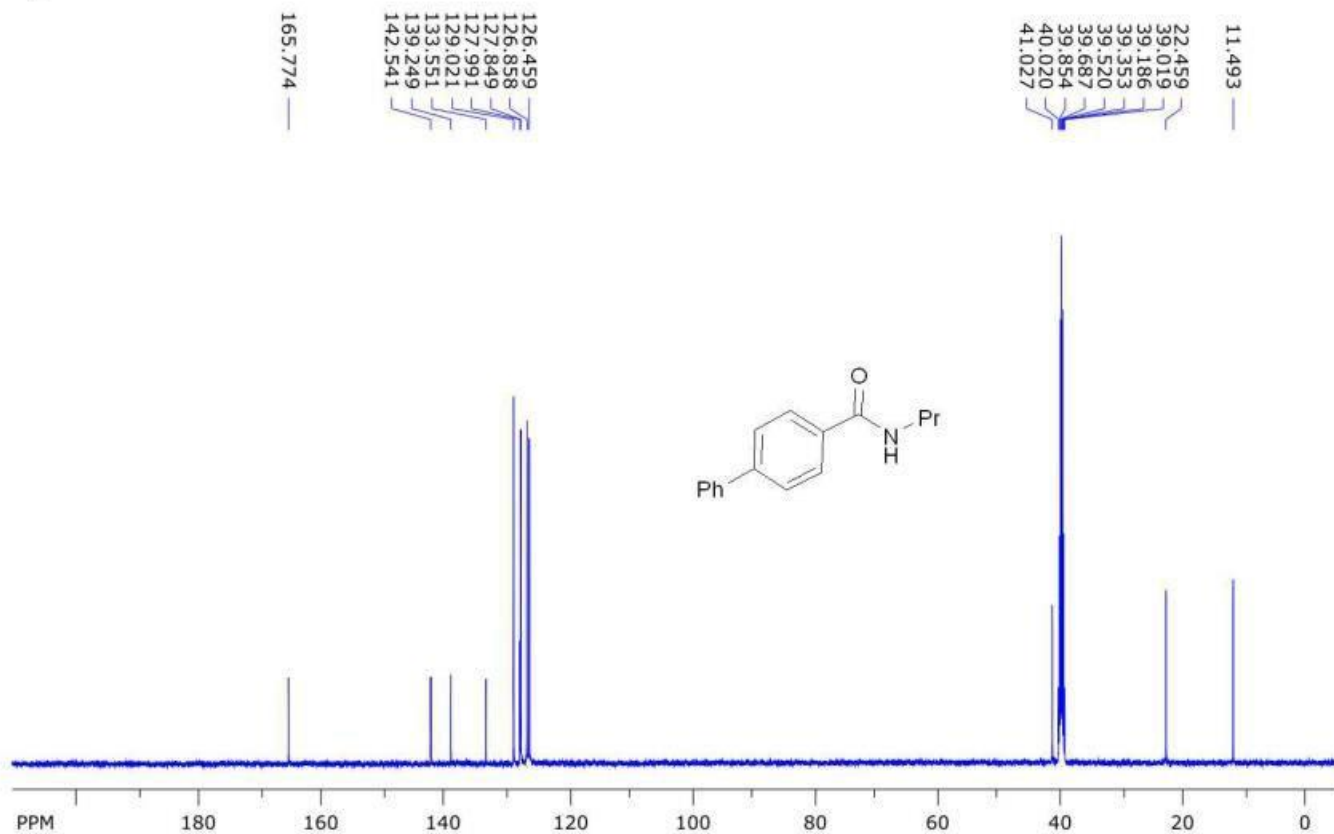

file: D:\NAPO\NMR\500-2\mkr10804\10\fid expt: <zpgg30>  
 transmitter freq.: 125.772879 MHz  
 time domain size: 65536 points  
 width: 36057.69 Hz = 286.6889 ppm = 0.550197 Hz/pt  
 number of scans: 512

freq. of 0 ppm: 125.757844 MHz  
 processed size: 32768 complex points  
 LB: 2.000 GF: 0.0000  
 Hz/cm: 1088.113 ppm/cm: 8.65141

# Compound 4l

SpinWorks 4: IVA 1958 1H DMSO

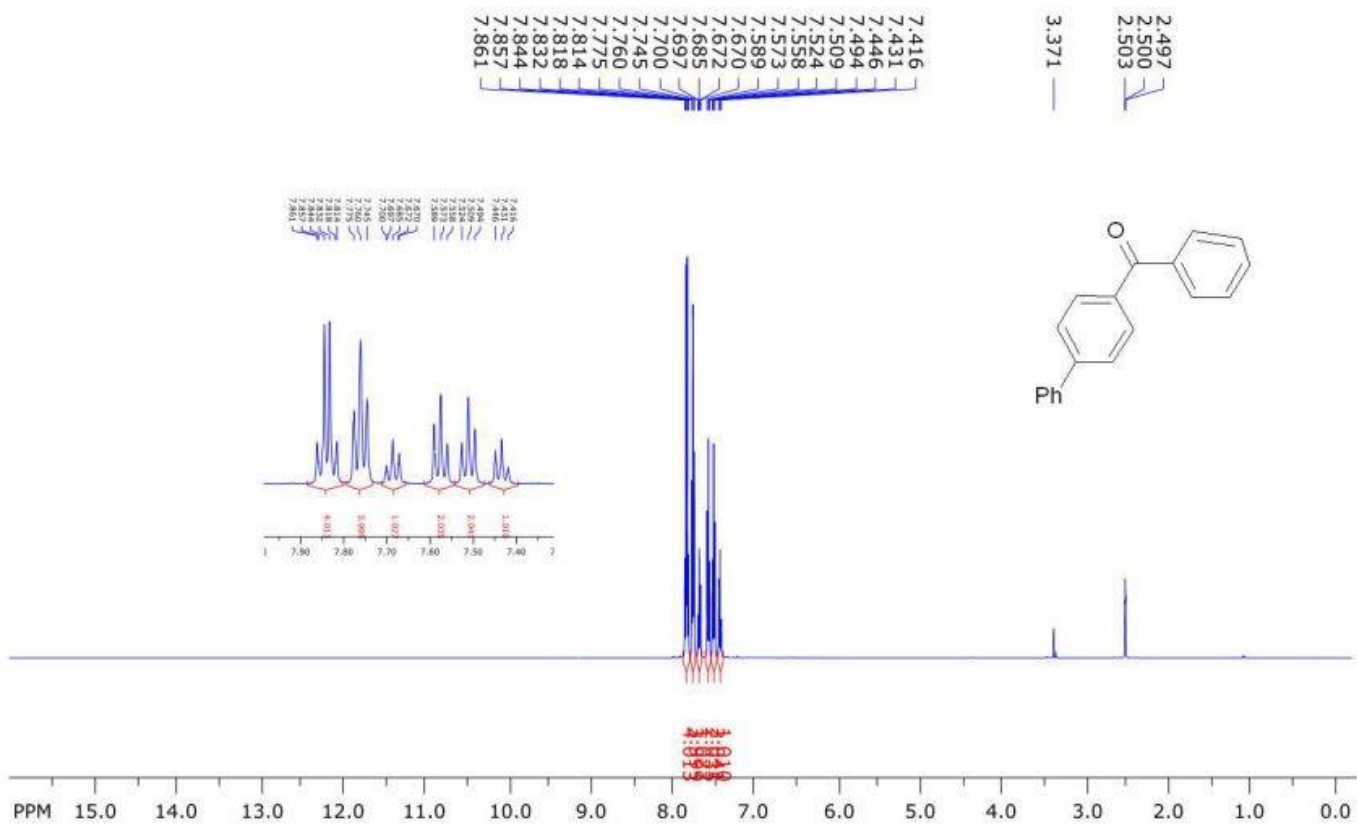

file: D:\NAPO\NMR\500-2\mkr10103\3\fid exp: <zg30>  
 transmitter freq.: 500.133001 MHz  
 time domain size: 65536 points  
 width: 12335.53 Hz = 24.6645 ppm = 0.188225 Hz/pt  
 number of scans: 24

freq. of 0 ppm: 500.130005 MHz  
 processed size: 65536 complex points  
 LB: 0.300 GF: 0.0000  
 Hz/cm: 326.946 ppm/cm: 0.65372

# Compound 4l

SpinWorks 4: IVA 1958 13C DMSO

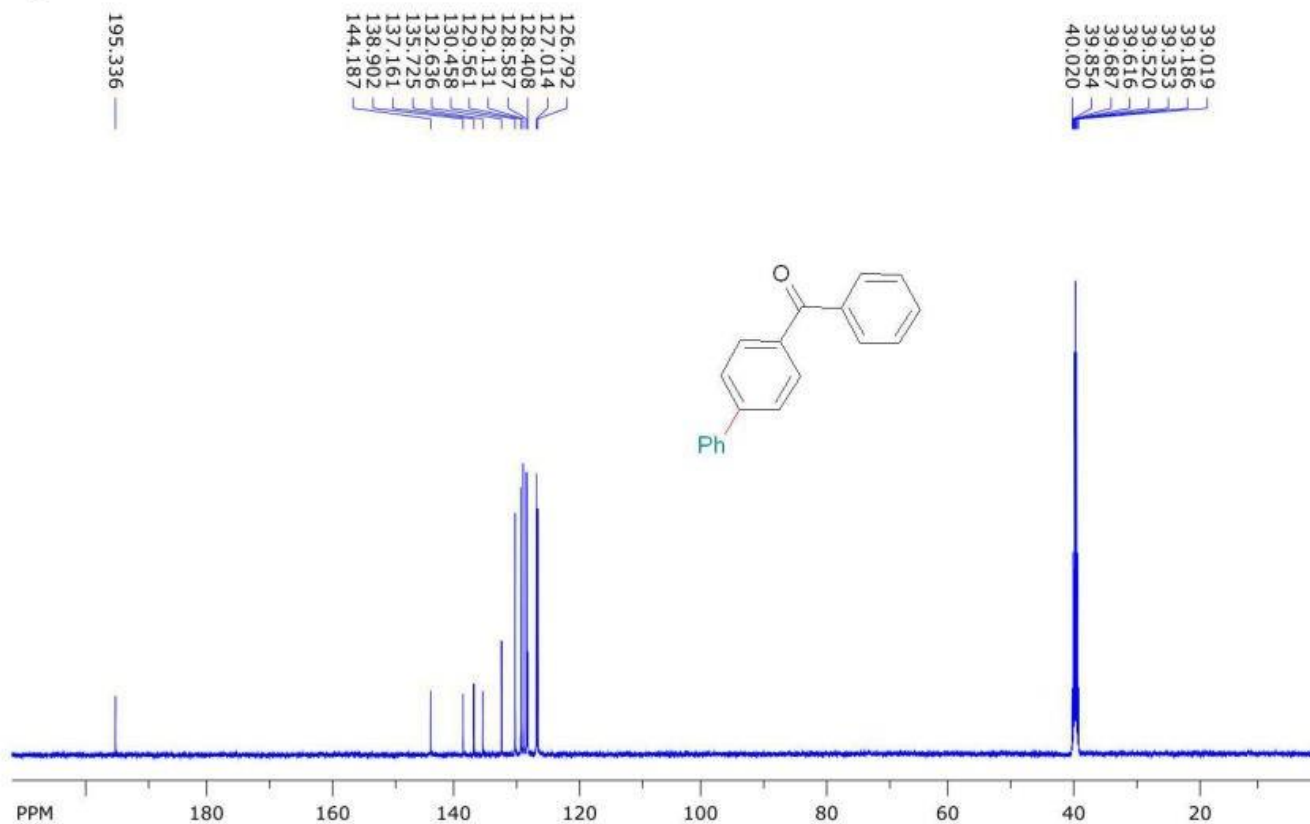

file: D:\NAPO\NMR\500-2\mkr10103\4\fid expt: <zgpg30>  
 transmitter freq.: 125.772879 MHz  
 time domain size: 65536 points  
 width: 36057.69 Hz = 286.6889 ppm = 0.550197 Hz/pt  
 number of scans: 512

freq. of 0 ppm: 125.757846 MHz  
 processed size: 32768 complex points  
 LB: 2.000 GF: 0.0000  
 Hz/cm: 1068.967 ppm/cm: 8.49919

# Compound 4m

SpinWorks 4: IVA 2869 1H CDCI3

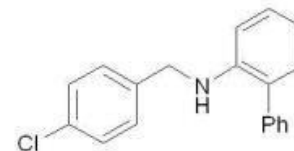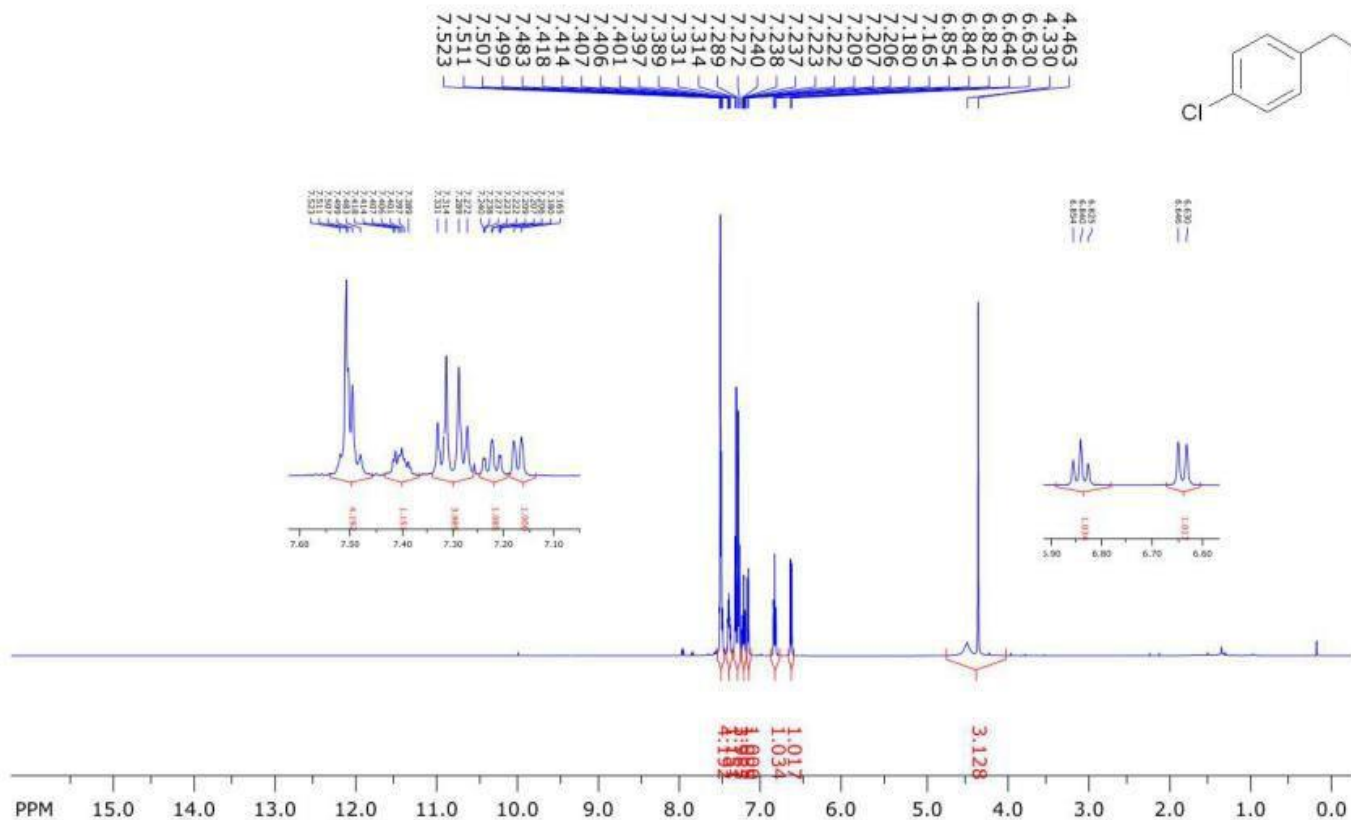

file: ...PO\NMR\500-2\mkr11706\9 2869-1\fid expt: <zg30>  
 transmitter freq.: 500.133001 MHz  
 time domain size: 65536 points  
 width: 12335.53 Hz = 24.6645 ppm = 0.188225 Hz/pt  
 number of scans: 24

freq. of 0 ppm: 500.130024 MHz  
 processed size: 65536 complex points  
 LB: 0.300 GF: 0.0000  
 Hz/cm: 331.313 ppm/cm: 0.66245

# Compound 4m

SpinWorks 4: IVA 2869 13C CDCL3

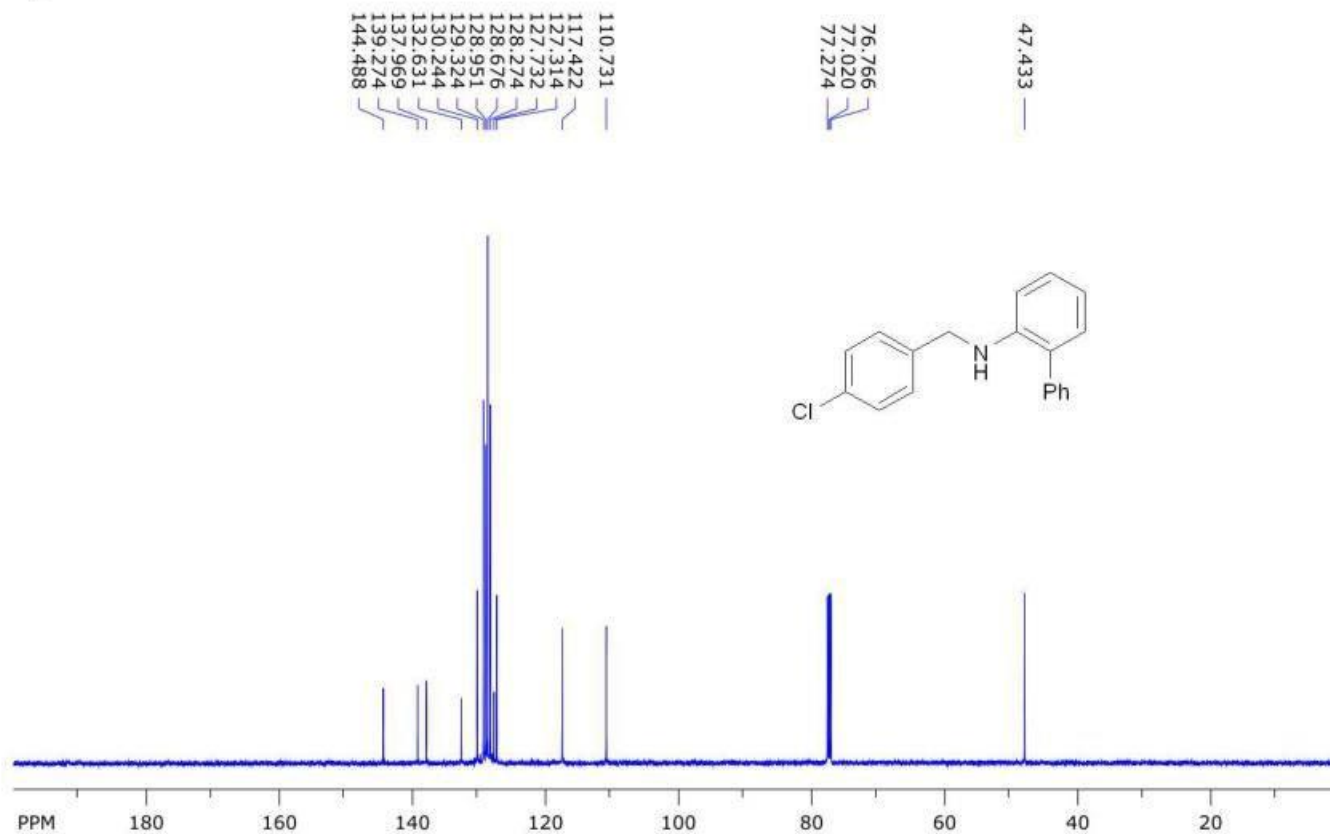

file: D:\NAPO\NMR\500-2\mkr11706\10\fid expt: <zgpg30>  
transmitter freq.: 125.772879 MHz  
time domain size: 65536 points  
width: 36057.69 Hz = 286.6889 ppm = 0.550197 Hz/pt  
number of scans: 512

freq. of 0 ppm: 125.757804 MHz  
processed size: 32768 complex points  
LB: 2.000 GF: 0.0000  
Hz/cm: 1008.339 ppm/cm: 8.01714



Compound **4n**

SpinWorks 4: IVA 1492 13C CDCL3

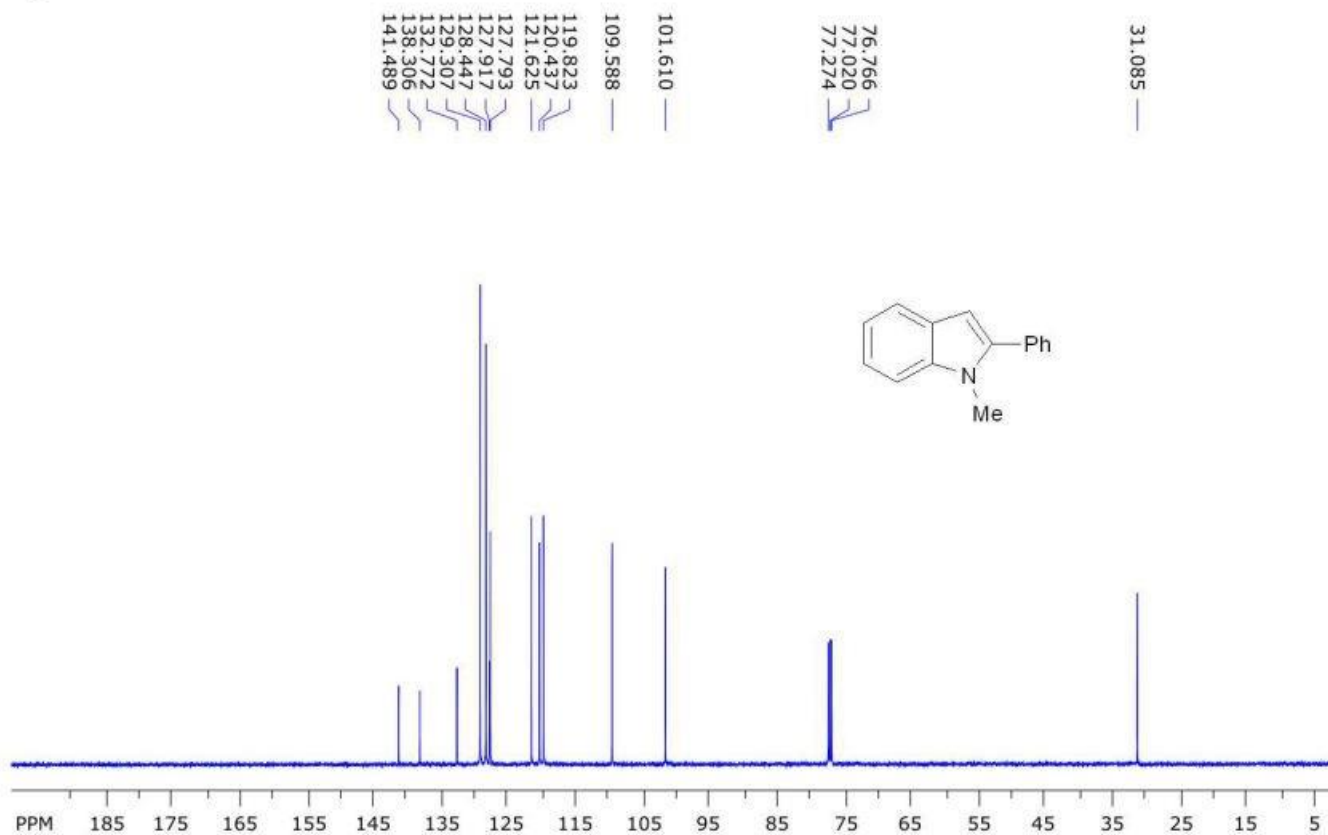

file: D:\NAPO\NMR\500-2\mkr100201\20\fid expt: <zpgg30>  
 transmitter freq.: 125.772879 MHz  
 time domain size: 65536 points  
 width: 36057.69 Hz = 286.6889 ppm = 0.550197 Hz/pt  
 number of scans: 512

freq. of 0 ppm: 125.757818 MHz  
 processed size: 32768 complex points  
 LB: 2.000 GF: 0.0000  
 Hz/cm: 995.575 ppm/cm: 7.91566

Compound **4o**

SpinWorks 4: IVA 1523 1H DMSO

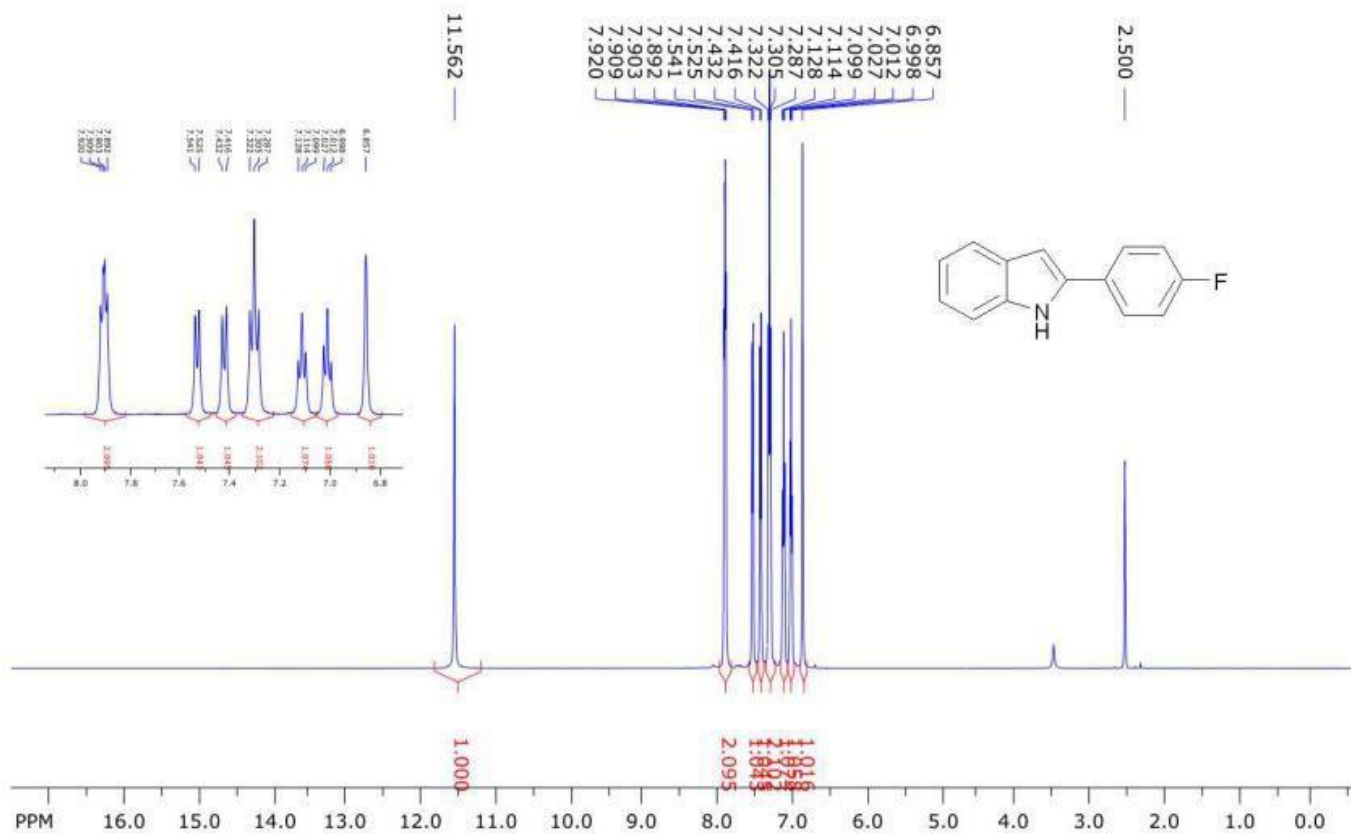

file: D:\NAPO\NMR\500-2\mkr11802\19\fid expt: <zg30>  
 transmitter freq.: 500.133001 MHz  
 time domain size: 65536 points  
 width: 12335.53 Hz = 24.6645 ppm = 0.188225 Hz/pt  
 number of scans: 24

freq. of 0 ppm: 500.130004 MHz  
 processed size: 65536 complex points  
 LB: 0.300 GF: 0.0000  
 Hz/cm: 362.970 ppm/cm: 0.72575



Compound **4o**

SpinWorks 4: IVA 1523 13C DMSO

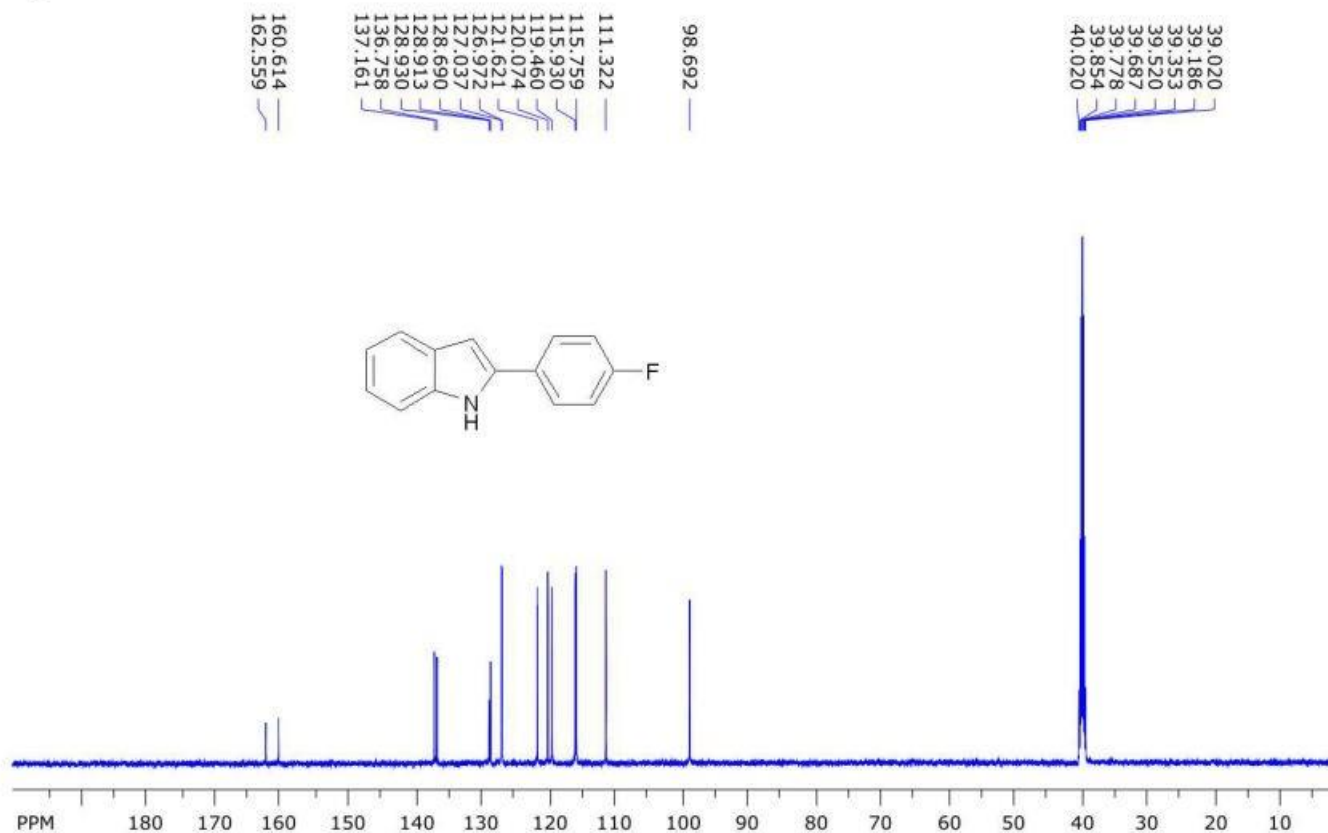

file: D:\NAPO\NMR\500-2\mkr11802\20\fid expt: <zgpg30>  
 transmitter freq.: 125.772879 MHz  
 time domain size: 65536 points  
 width: 36057.69 Hz = 286.6889 ppm = 0.550197 Hz/ppm  
 number of scans: 512

freq. of 0 ppm: 125.757842 MHz  
 processed size: 32768 complex points  
 LB: 2.000 GF: 0.0000  
 Hz/cm: 1005.148 ppm/cm: 7.99177



Compound **4p**

SpinWorks 4: IVA 1893 13C CDCL3

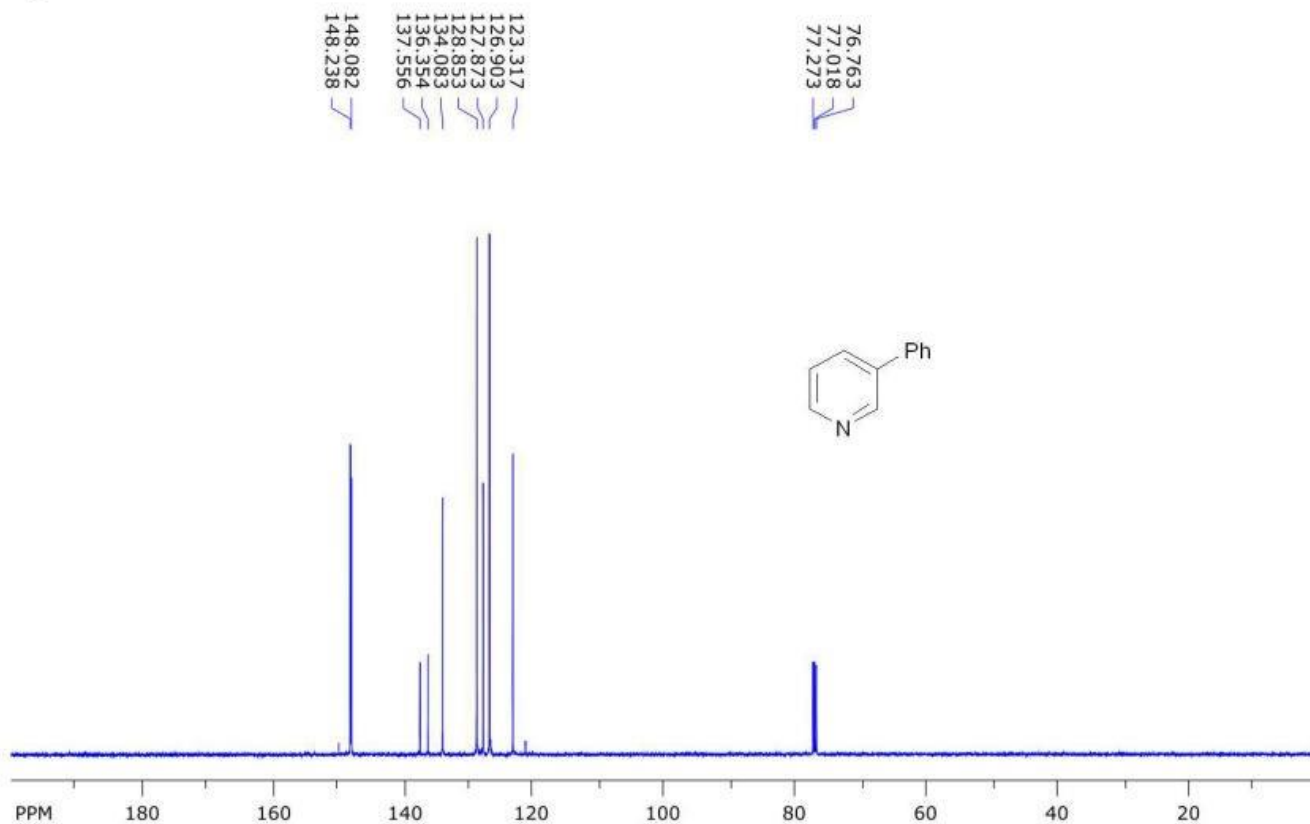

file: D:\NAPO\NMR\500-2\mkr10403\12\fid exp: <zggp30>  
 transmitter freq.: 125.772879 MHz  
 time domain size: 65536 points  
 width: 36057.69 Hz = 286.6889 ppm = 0.550197 Hz/pt  
 number of scans: 512

freq. of 0 ppm: 125.757820 MHz  
 processed size: 32768 complex points  
 LB: 2.000 GF: 0.0000  
 Hz/cm: 1009.934 ppm/cm: 8.02983

# Compound 4q

SpinWorks 4: IVA 1319 1H CDCl3

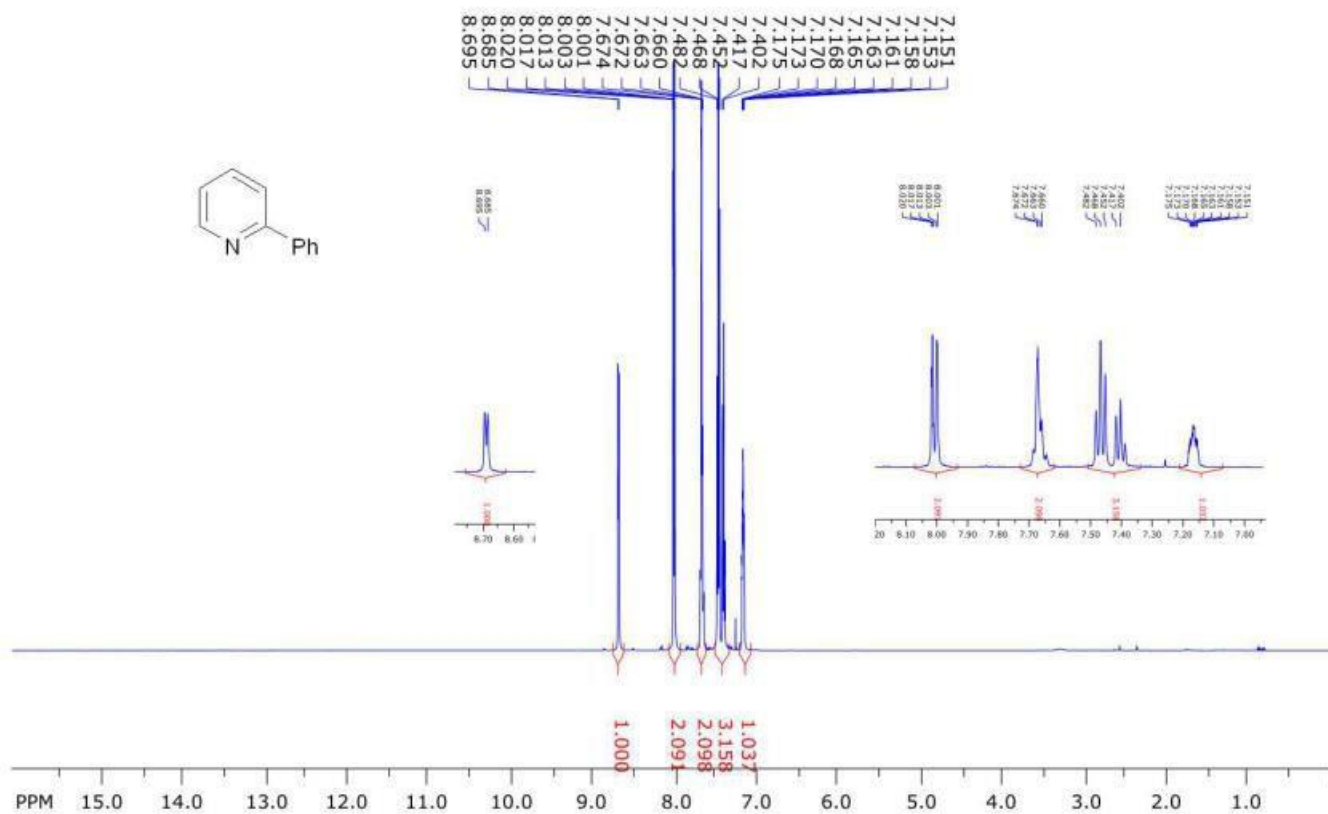

file: D:\NAPO\NMR\500-2\mkr12311\19\fid expt: <zg30>  
 transmitter freq.: 500.133001 MHz  
 time domain size: 65536 points  
 width: 12335.53 Hz = 24.6645 ppm = 0.188225 Hz/pt  
 number of scans: 32

freq. of 0 ppm: 500.130025 MHz  
 processed size: 65536 complex points  
 LB: 0.300 GF: 0.0000  
 Hz/cm: 324.763 ppm/cm: 0.64935

# Compound 4q

SpinWorks 4: IVA 1319 13C CDCL3

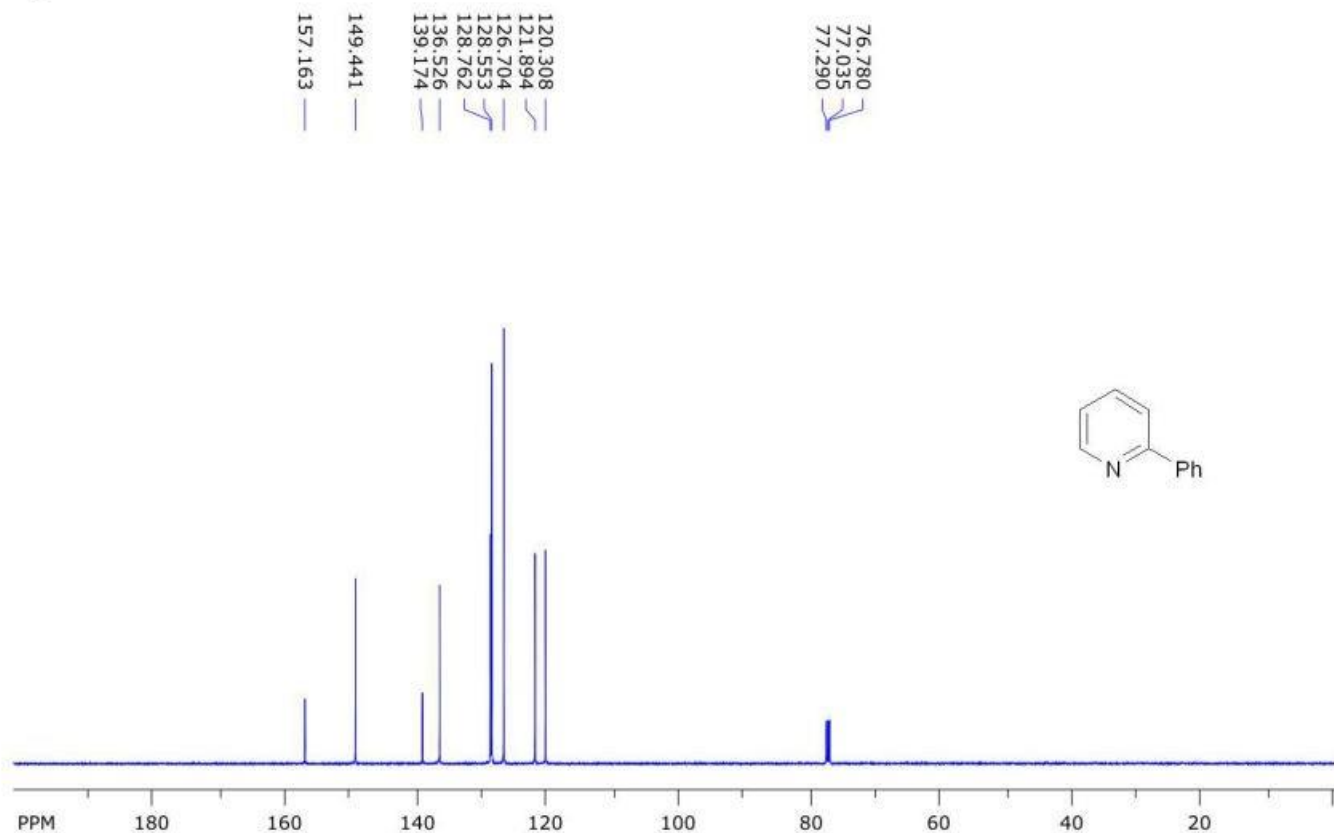

file: D:\NAPO\NMR\500-2\mkr12311\20\fid expt: <zgpg30>  
transmitter freq.: 125.772879 MHz  
time domain size: 65536 points  
width: 36057.69 Hz = 286.6889 ppm = 0.550197 Hz/pt  
number of scans: 512

freq. of 0 ppm: 125.757821 MHz  
processed size: 32768 complex points  
LB: 2.000 GF: 0.0000  
Hz/cm: 1021.103 ppm/cm: 8.11862

# Compound 4r

SpinWorks 4: ISM 33 1H CDCI3

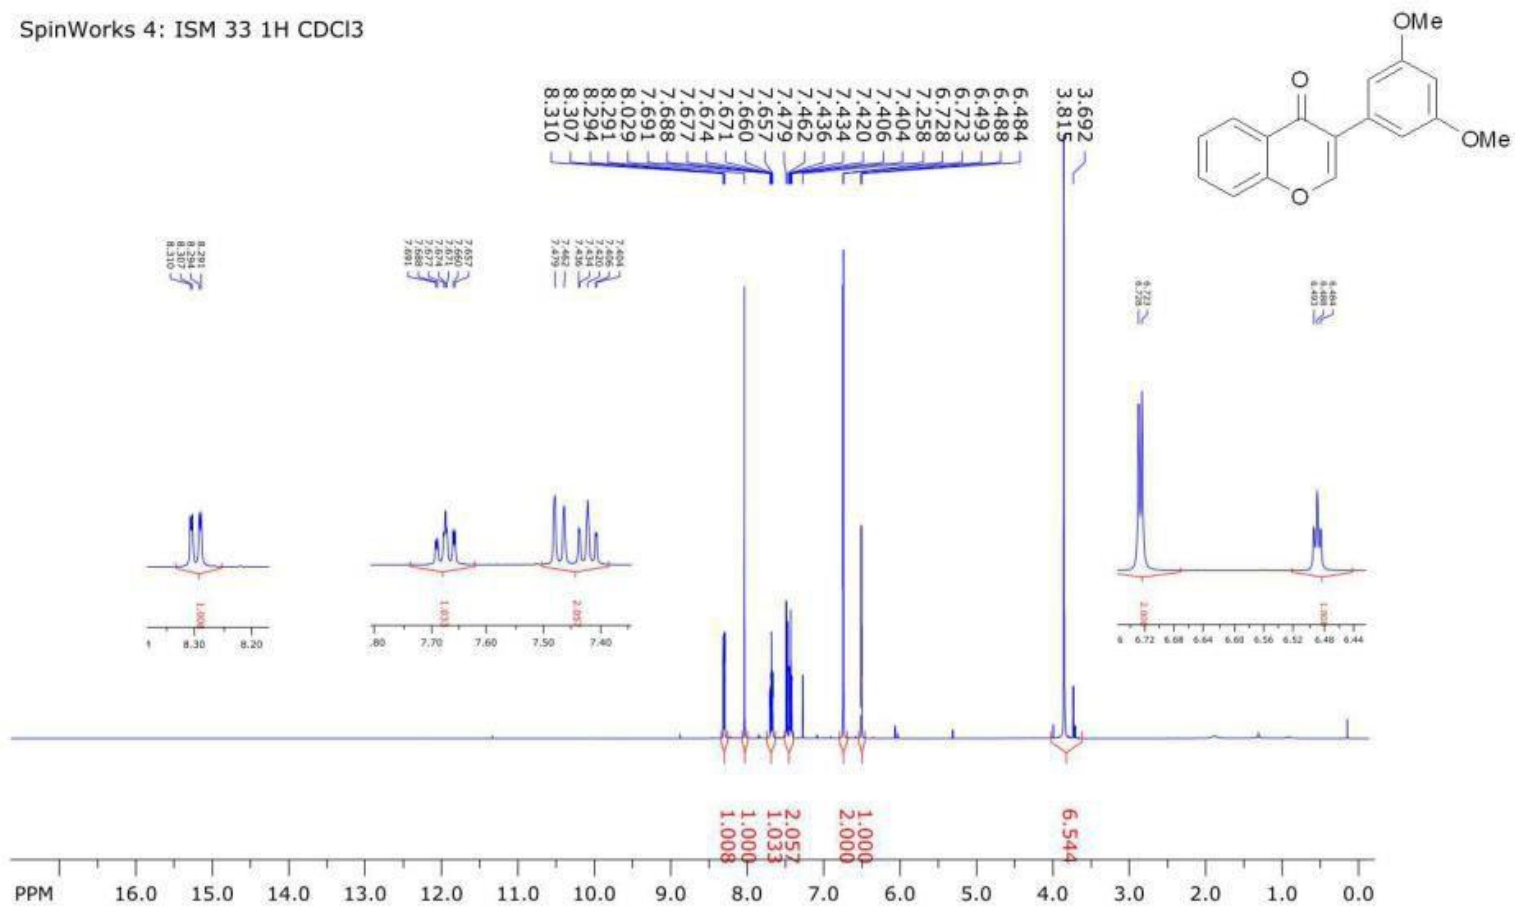

# Compound 4r

SpinWorks 4: ISM 33 13C CDCl3

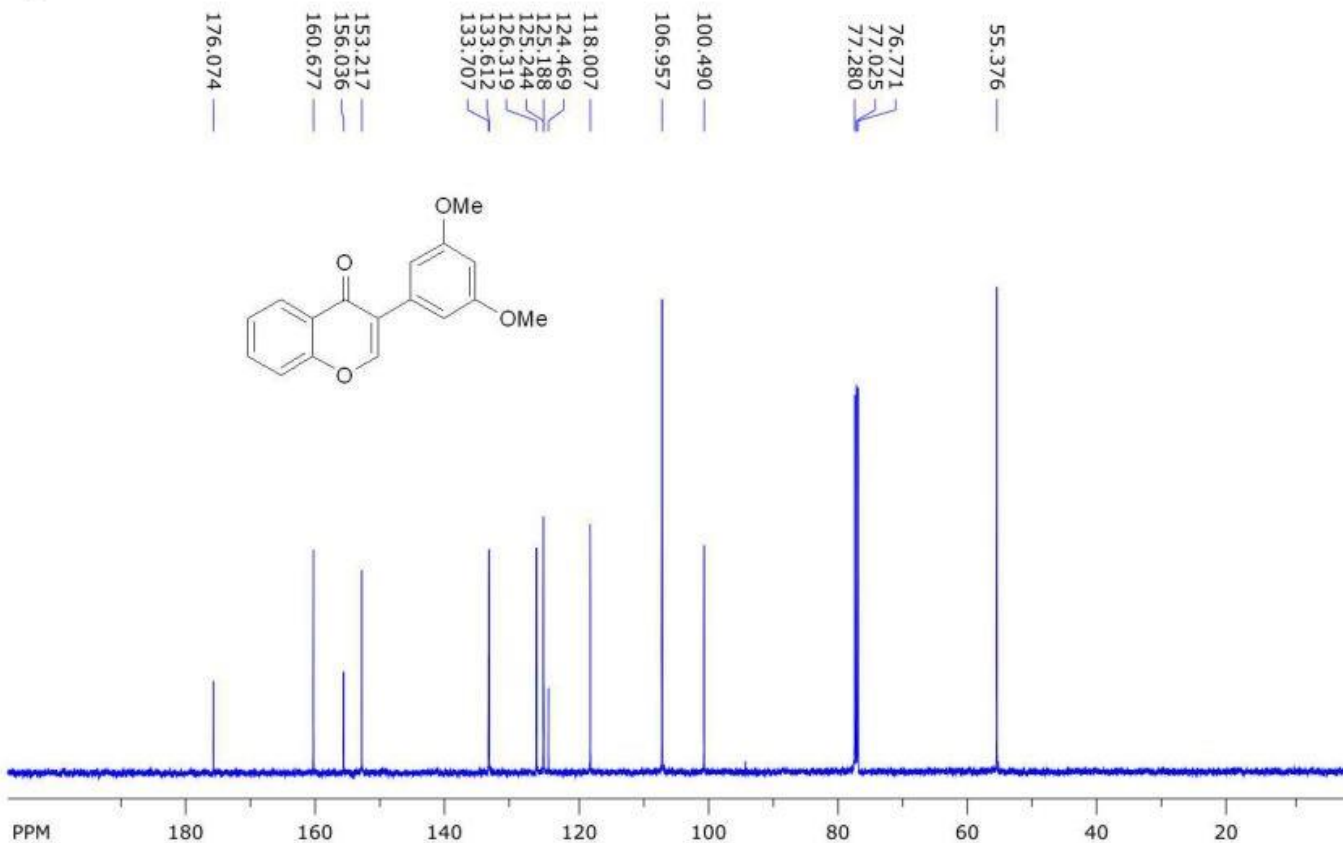

file: D:\NAPO\NMR\500-1\mkr11004\6\fid exp: <zpgg30>  
 transmitter freq.: 125.772879 MHz  
 time domain size: 65536 points  
 width: 36057.69 Hz = 286.6889 ppm = 0.550197 Hz/pt  
 number of scans: 512

freq. of 0 ppm: 125.757800 MHz  
 processed size: 32768 complex points  
 LB: 2.000 GF: 0.0000  
 Hz/cm: 1040.248 ppm/cm: 8.27085

## **(D) Computational study**



## Computational methodology

In current study, all the simulations of mechanistic part are performed using Gaussian09 software.<sup>1</sup> B3LYP/6-31G(d,p) level of theory is used to perform the geometry optimization of ground states as well as for transition states. B3LYP is a cost effective DFT functional which is not only reliable for mechanistic studies, but also frequently implemented for geometric optimization of various compounds.<sup>2-4</sup>

Nature of optimized structures is confirmed via frequency analysis i.e., absence of negative frequency confirms the true minima nature of reactants, intermediates, and products. On the other hand, transition states are confirmed from the presence of one imaginary frequency. Furthermore, imaginary frequency of transition states is also analyzed to validate that eigen vector of these states correspond to motion along the reaction coordinates.<sup>5</sup> All the energy values are reported in kcal/mol while bond distances for all structures are in angstrom (Å).

## Cartesian Coordinates of optimized geometries

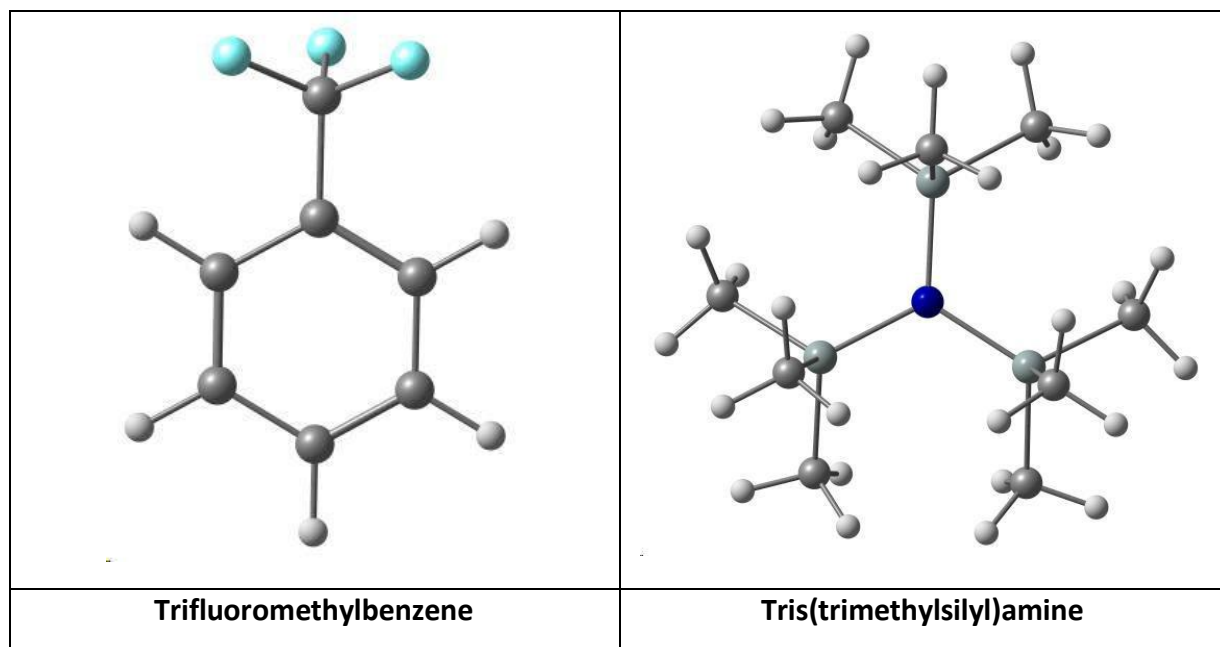

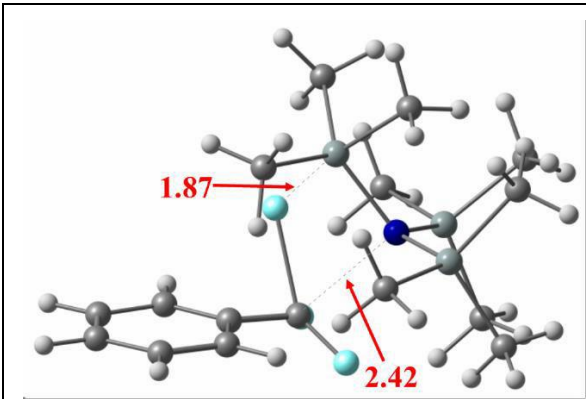

TS

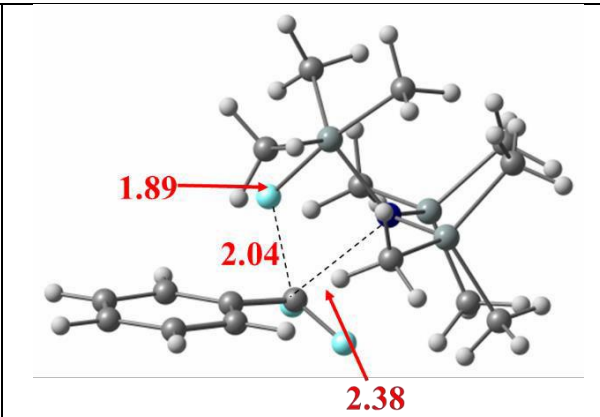

TS1<sup>•-</sup>

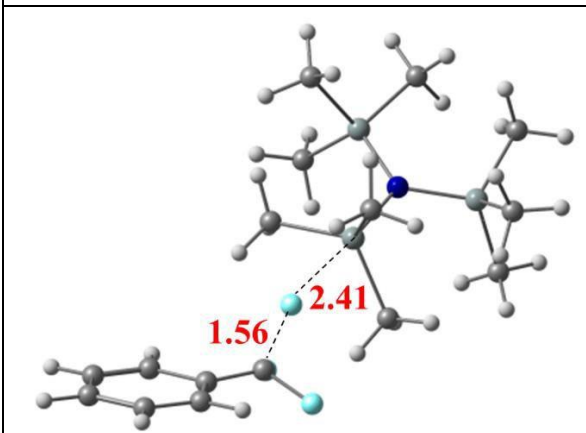

TS1<sup>•-</sup> (step I)

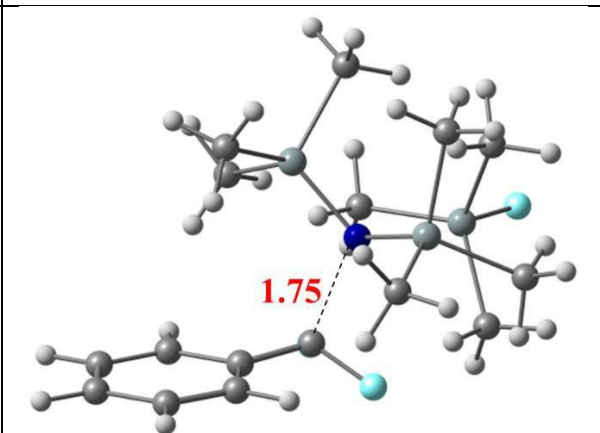

TS1<sup>•-</sup> (step II)

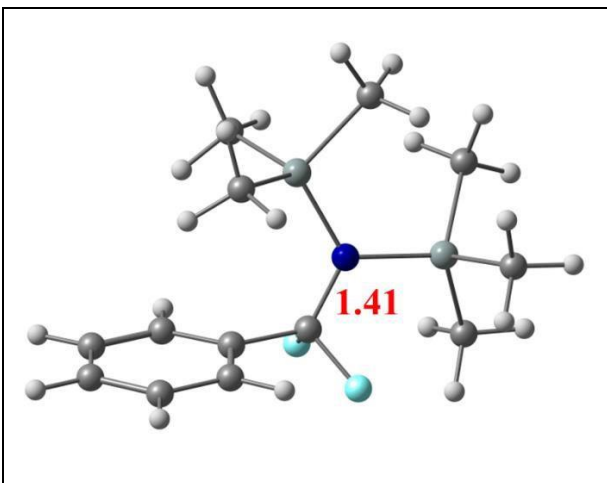

Int1

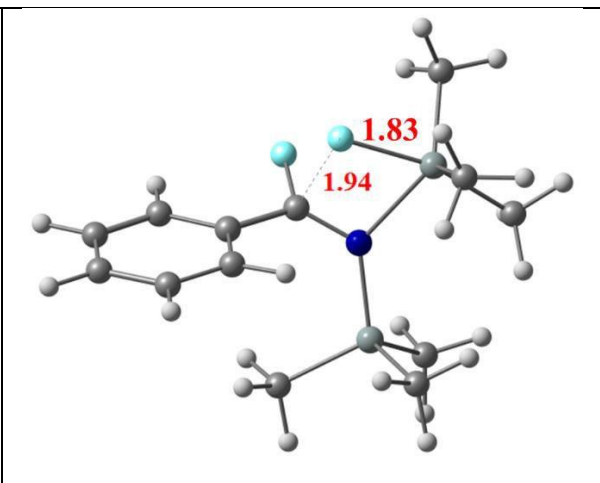

TS2

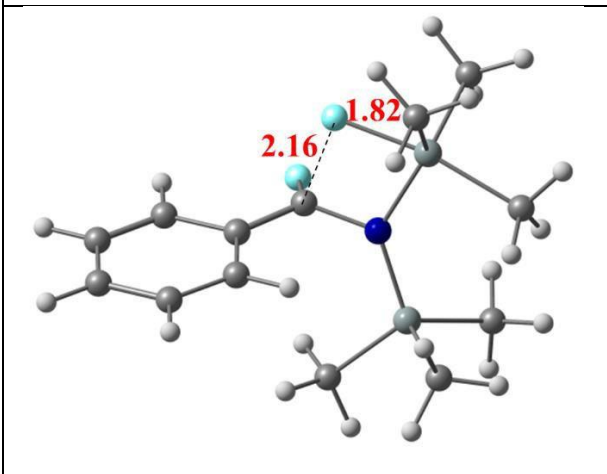

TS2\*<sup>-</sup>

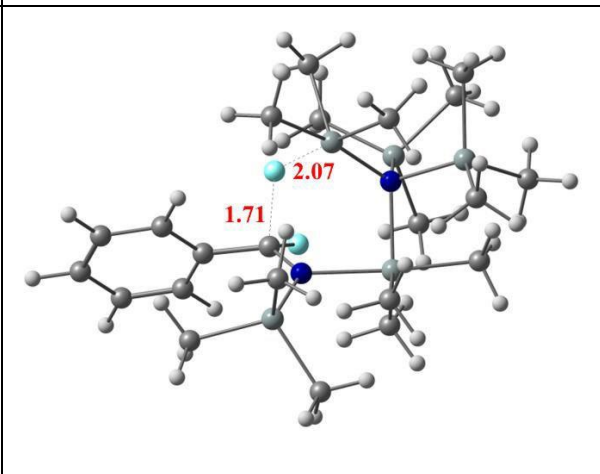

TS2'

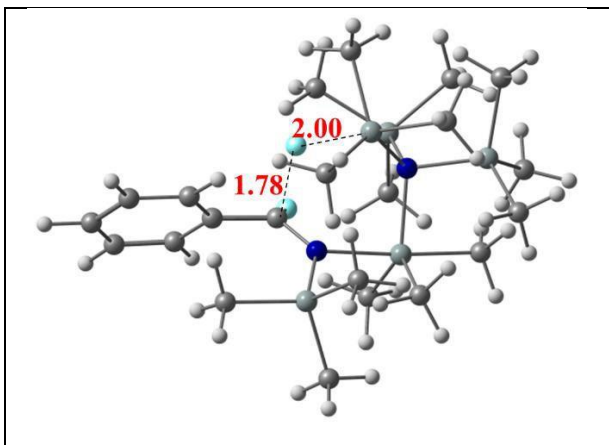

TS2\*--

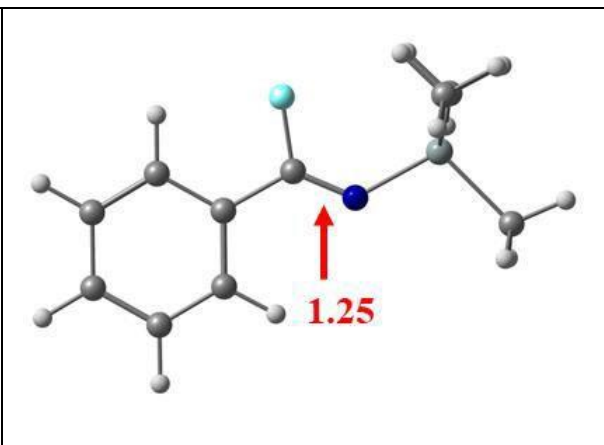

Int2

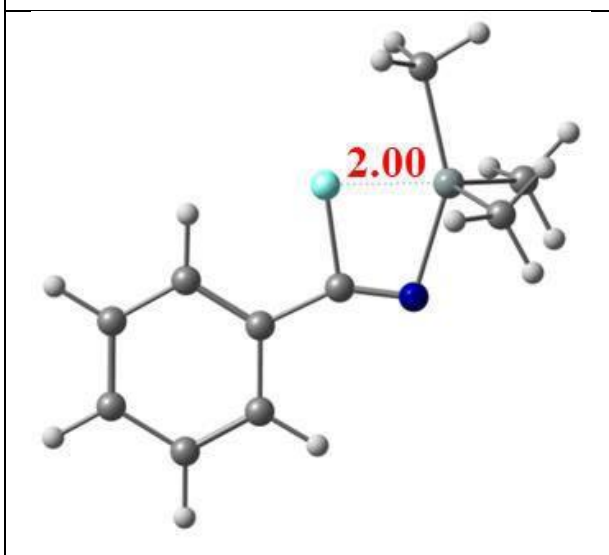

TS3

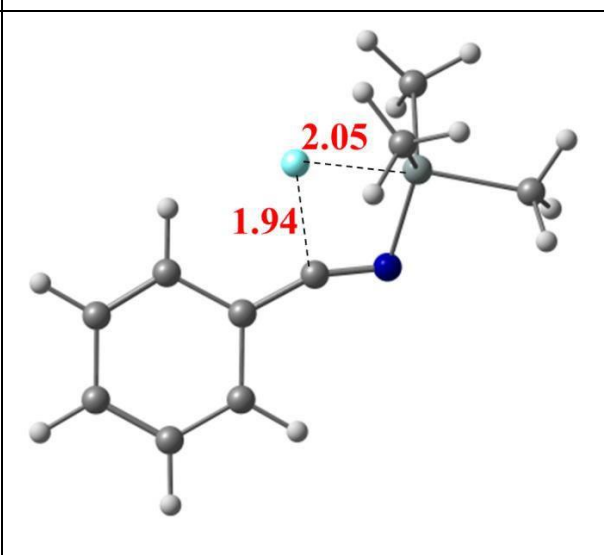

TS3\*--

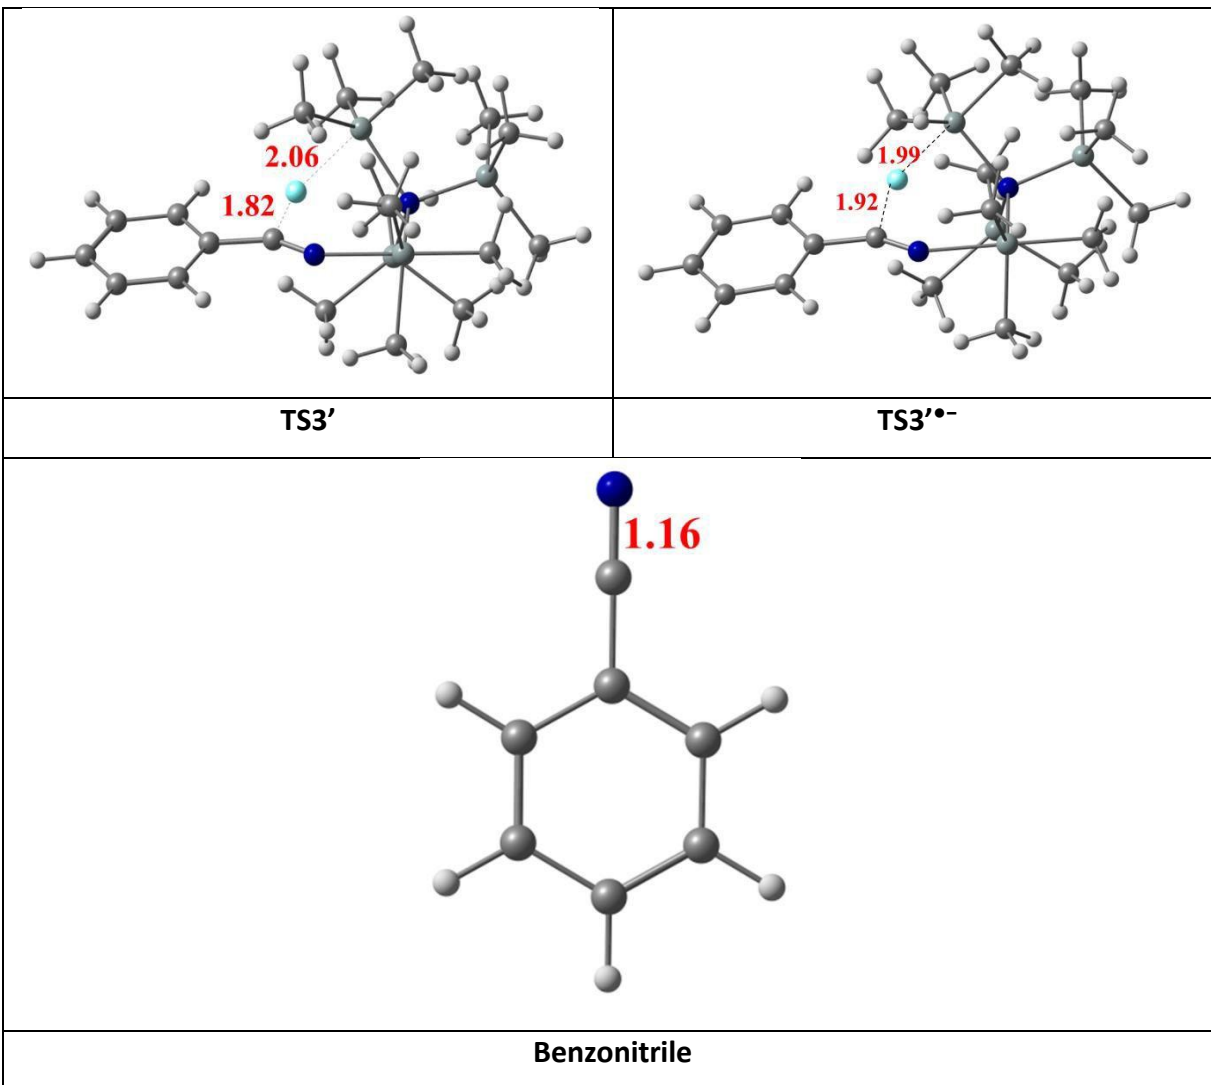

**Table S4:** Summary of electronic energy (SCF energy), zero-point vibrational energy (ZPVE) and Gibbs free energy of optimized reacting species

| Optimized Geometry          | SCF energy (au) | ZPVE (au) | Gibbs free energy (au) |
|-----------------------------|-----------------|-----------|------------------------|
| Trifluoromethylbenzene      | -569.29         | -569.19   | -569.22                |
| Tris(trimethylsilyl)amine   | -1282.66        | -1282.32  | -1282.36               |
| TS1                         | -1851.84        | -1851.29  | -1851.35               |
| TS1 <sup>•-</sup>           | -1851.78        | -1851.30  | -1851.35               |
| TS1 <sup>•-</sup> (step I)  | -1851.92        | -1851.29  | -1851.35               |
| TS1 <sup>•-</sup> (step II) | -1851.95        | -1851.26  | -1851.34               |
| Int1                        | -1106.84        | -1106.68  | -1106.72               |
| TS2                         | -1106.79        | -1106.64  | -1106.68               |
| TS2 <sup>•-</sup>           | -1106.11        | -1106.93  | -1106.97               |
| TS2'                        | -2153.43        | -2153.19  | -2153.24               |
| TS2' <sup>•-</sup>          | -2153.36        | -2153.03  | -2153.07               |
| Int2                        | -833.67         | -833.54   | -833.58                |
| TS3                         | -833.62         | -833.49   | -833.53                |
| TS3 <sup>•-</sup>           | -833.63         | -833.52   | -833.55                |
| TS3'                        | -1762.24        | -1762.09  | -1762.13               |
| TS3' <sup>•-</sup>          | -1762.25        | -1761.96  | -1762.00               |
| Benzonitrile                | -324.50         | -324.40   | -324.43                |

### Trifluoromethyl benzene

0 1

C -0.03418200 2.83637500 0.00000000

|   |             |             |             |
|---|-------------|-------------|-------------|
| C | -0.03508700 | 2.13872200  | -1.20921700 |
| C | -0.03508700 | 0.74448100  | -1.21200900 |
| C | -0.03556900 | 0.04904200  | 0.00000000  |
| C | -0.03508700 | 0.74448100  | 1.21200900  |
| C | -0.03508700 | 2.13872200  | 1.20921700  |
| H | -0.03587700 | 3.92244300  | 0.00000000  |
| H | -0.03907000 | 2.67959000  | -2.15068900 |
| H | -0.04322800 | 0.19596700  | -2.14763600 |
| H | -0.04322800 | 0.19596700  | 2.14763600  |
| H | -0.03907000 | 2.67959000  | 2.15068900  |
| C | 0.02352400  | -1.45511600 | 0.00000000  |
| F | -0.57682200 | -1.98331200 | 1.09038900  |
| F | -0.57682200 | -1.98331200 | -1.09038900 |
| F | 1.30030200  | -1.90602100 | 0.00000000  |

**Tris(trimethylsilyl)amine**

0 1

|    |             |             |             |
|----|-------------|-------------|-------------|
| N  | 0.00035600  | 0.00012500  | -0.00038000 |
| Si | -0.97372700 | 1.45852100  | 0.00003400  |
| Si | -0.77653400 | -1.57237700 | 0.00003100  |
| Si | 1.75015400  | 0.11381800  | 0.00003400  |
| H  | -0.71609000 | 2.29681200  | -1.20101800 |

|   |             |             |             |
|---|-------------|-------------|-------------|
| H | -2.40151900 | 1.04434400  | -0.00050100 |
| H | -0.71682900 | 2.29584600  | 1.20194100  |
| H | -1.63199200 | -1.76759800 | -1.20068400 |
| H | 0.29543700  | -2.60243400 | -0.00116800 |
| H | -1.62977100 | -1.76829400 | 1.20223300  |
| H | 2.34724200  | -0.52941500 | -1.20055800 |
| H | 2.10603100  | 1.55724900  | -0.00133500 |
| H | 2.34649500  | -0.52685900 | 1.20236400  |

### TS1

$v_i = -326.77$

Energy = -1851.84

0 1

|   |            |             |             |
|---|------------|-------------|-------------|
| C | 5.06503300 | 0.41712400  | 0.10035300  |
| C | 4.17365300 | 1.42814300  | -0.25744100 |
| C | 2.87245700 | 1.10834300  | -0.63917900 |
| C | 2.46539100 | -0.23180300 | -0.63935300 |
| C | 3.35397500 | -1.25087700 | -0.25793300 |
| C | 4.65535800 | -0.92160200 | 0.09137000  |
| H | 6.08053500 | 0.66876700  | 0.39020300  |
| H | 4.49030300 | 2.46573600  | -0.24666600 |
| H | 2.17945200 | 1.88830600  | -0.93088300 |



|    |             |             |             |
|----|-------------|-------------|-------------|
| H  | 3.01327400  | -2.27826000 | -0.24092100 |
| H  | 5.35111700  | -1.70583900 | 0.37099100  |
| C  | 1.12327300  | -0.57277200 | -1.11209600 |
| F  | 0.85325400  | -1.77817500 | -1.52755200 |
| F  | 0.83802800  | -1.32056000 | 0.77003100  |
| F  | 0.67417900  | 0.27220400  | -2.01332400 |
| N  | -0.95227100 | 0.04623900  | -0.02700700 |
| Si | -2.09719200 | -1.18032900 | -0.58931200 |
| Si | -1.43624600 | 1.71844900  | -0.36609700 |
| Si | -0.32969200 | -0.21202000 | 1.71581200  |
| C  | -0.82360400 | -1.81537800 | 2.68992300  |
| H  | -0.48877000 | -2.67723900 | 2.15142300  |
| H  | -0.36702000 | -1.79974000 | 3.65749100  |
| H  | -1.88743700 | -1.85348300 | 2.79812400  |
| C  | -1.66030300 | 0.97909000  | 2.47365800  |
| H  | -1.71440000 | 0.82661100  | 3.53135500  |
| H  | -1.38622100 | 1.99376800  | 2.27313800  |
| H  | -2.61418300 | 0.77384400  | 2.03446700  |
| C  | 1.22697400  | 0.80289900  | 2.27288300  |
| H  | 1.57900100  | 0.42939900  | 3.21175200  |
| H  | 1.99849700  | 0.70465500  | 1.53803700  |
| H  | 0.96199700  | 1.83441800  | 2.37611100  |

|   |             |             |             |
|---|-------------|-------------|-------------|
| C | 0.08712000  | 2.88007800  | -0.06019600 |
| H | 0.06329900  | 3.24187200  | 0.94650000  |
| H | 0.99175700  | 2.33168200  | -0.22079900 |
| H | 0.04650900  | 3.70737100  | -0.73757100 |
| C | -2.92323800 | 2.32637800  | 0.72150500  |
| H | -2.54936500 | 2.85468000  | 1.57357100  |
| H | -3.54550700 | 2.97699900  | 0.14325300  |
| H | -3.49498700 | 1.48275700  | 1.04755300  |
| C | -1.95136200 | 1.84626600  | -2.23208700 |
| H | -1.95415900 | 2.87343800  | -2.53176800 |
| H | -1.25349700 | 1.30134600  | -2.83287500 |
| H | -2.93054100 | 1.43451000  | -2.36079700 |
| C | -3.85323100 | -0.91229000 | 0.19048300  |
| H | -4.32128000 | -0.06587900 | -0.26713900 |
| H | -4.45287000 | -1.78324000 | 0.02683900  |
| H | -3.75408000 | -0.73991600 | 1.24184200  |
| C | -2.27957200 | -1.04016400 | -2.51562700 |
| H | -3.08477800 | -0.37571000 | -2.75024400 |
| H | -1.37057000 | -0.66042900 | -2.93325900 |
| H | -2.48396000 | -2.00704500 | -2.92583000 |
| C | -1.46466100 | -2.95295500 | -0.11888200 |
| H | -0.39903300 | -2.93772500 | -0.02346800 |

|   |             |             |             |
|---|-------------|-------------|-------------|
| H | -1.90174200 | -3.25256900 | 0.81068300  |
| H | -1.74433900 | -3.64625400 | -0.88439900 |

**TS1\*-**

$v_i = -351.19$

Energy = -1851.78

-1 2

|   |             |             |             |
|---|-------------|-------------|-------------|
| C | 5.06281500  | 0.41850800  | 0.09793500  |
| C | 4.17079500  | 1.42699100  | -0.26587400 |
| C | 2.87042400  | 1.10437800  | -0.64675100 |
| C | 2.46383800  | -0.23591900 | -0.64048300 |
| C | 3.35258900  | -1.25231600 | -0.25249000 |
| C | 4.65362000  | -0.92041900 | 0.09588800  |
| H | 6.07794600  | 0.67230000  | 0.38703700  |
| H | 4.48707300  | 2.46476000  | -0.26063700 |
| H | 2.17691200  | 1.88228700  | -0.94320700 |
| H | 3.01227600  | -2.27971600 | -0.22998600 |
| H | 5.34939200  | -1.70317500 | 0.38079600  |
| C | 1.12297700  | -0.57976900 | -1.11271800 |
| F | 0.85309900  | -1.78729100 | -1.52164600 |
| F | 0.83589100  | -1.31974400 | 0.77421200  |
| F | 0.67243500  | 0.26054900  | -2.01725900 |
| N | -0.95301700 | 0.04556800  | -0.02794200 |

|    |             |             |             |
|----|-------------|-------------|-------------|
| Si | -2.09777600 | -1.18676800 | -0.57694000 |
| Si | -1.44034200 | 1.71498000  | -0.37582000 |
| Si | -0.32368200 | -0.19828900 | 1.71436300  |
| C  | -1.45084900 | -2.95655500 | -0.11548800 |
| H  | -1.71309900 | -3.17921000 | 0.89770000  |
| H  | -1.89591400 | -3.67990900 | -0.76631500 |
| H  | -0.38672400 | -2.98666600 | -0.22333700 |
| C  | -0.82284900 | -1.79015600 | 2.70451000  |
| H  | -0.29915600 | -2.63517500 | 2.30879600  |
| H  | -0.56764800 | -1.66334200 | 3.73586300  |
| H  | -1.87705700 | -1.94994000 | 2.61498100  |
| C  | -3.84586600 | -0.92871100 | 0.22380100  |
| H  | -4.44157000 | -0.30815000 | -0.41254900 |
| H  | -4.32521900 | -1.87734300 | 0.34716400  |
| H  | -3.73496200 | -0.45830900 | 1.17843300  |
| C  | -1.64431500 | 1.00795700  | 2.46569400  |
| H  | -1.72009100 | 0.84191800  | 3.52001400  |
| H  | -1.34720900 | 2.01977100  | 2.28442100  |
| H  | -2.59403400 | 0.82748100  | 2.00704300  |
| C  | 1.24052300  | 0.81326900  | 2.25622500  |
| H  | 1.60614300  | 0.43321000  | 3.18723400  |
| H  | 2.00142000  | 0.72060600  | 1.50966800  |

|   |             |             |             |
|---|-------------|-------------|-------------|
| H | 0.97673500  | 1.84391300  | 2.37063700  |
| C | 0.07773100  | 2.88238400  | -0.06562600 |
| H | 0.03350900  | 3.71182700  | -0.74013900 |
| H | 0.05211900  | 3.24057800  | 0.94231300  |
| H | 0.98485400  | 2.33862400  | -0.22796400 |
| C | -2.93658500 | 2.32213900  | 0.69945500  |
| H | -2.57533100 | 2.93057600  | 1.50207600  |
| H | -3.60434800 | 2.89485800  | 0.09036900  |
| H | -3.45532200 | 1.47586000  | 1.09898400  |
| C | -1.94443500 | 1.83397500  | -2.24540000 |
| H | -1.90346800 | 2.85538600  | -2.56153600 |
| H | -1.26826700 | 1.25075500  | -2.83493600 |
| H | -2.93959900 | 1.46141500  | -2.37088900 |
| C | -2.30385400 | -1.04630300 | -2.50084300 |
| H | -3.09287600 | -0.35948100 | -2.72583200 |
| H | -1.39041200 | -0.69403100 | -2.93261700 |
| H | -2.54193500 | -2.00792200 | -2.90520100 |

**TS1\*<sup>-</sup> (Step I)**

$v_i = -171.80$

Energy = -1851.92

-1 2

|   |            |            |             |
|---|------------|------------|-------------|
| C | 5.36966100 | 1.03860000 | -0.50767900 |
|---|------------|------------|-------------|

|    |             |             |             |
|----|-------------|-------------|-------------|
| C  | 5.02621000  | -0.25660500 | -1.00640700 |
| C  | 3.84092100  | -0.85143900 | -0.67628600 |
| C  | 2.89326000  | -0.20527700 | 0.22042800  |
| C  | 3.25299900  | 1.11870200  | 0.70186500  |
| C  | 4.45670100  | 1.69961200  | 0.35181700  |
| H  | 6.31362700  | 1.50385800  | -0.78173100 |
| H  | 5.70250200  | -0.76849500 | -1.68766500 |
| H  | 3.58225500  | -1.82847200 | -1.07579900 |
| H  | 2.57119800  | 1.62738700  | 1.38086000  |
| H  | 4.70881400  | 2.67215200  | 0.76660700  |
| C  | 1.63659100  | -0.75779900 | 0.46639900  |
| F  | 0.98902800  | -0.31399900 | 1.58937900  |
| F  | 1.55409100  | -2.12844000 | 0.43648800  |
| F  | 0.50984900  | -0.44939500 | -0.56056200 |
| N  | -3.65342000 | 0.22047900  | -0.14784400 |
| Si | -4.71004300 | -1.16118500 | -0.01720300 |
| Si | -4.18600000 | 1.87616900  | -0.12666200 |
| Si | -1.86790700 | -0.10029400 | -0.32933600 |
| C  | -1.13256974 | 1.64724887  | 0.08172731  |
| H  | -0.06563653 | 1.58274182  | 0.13063900  |
| H  | -1.41325677 | 2.34115478  | -0.68287021 |
| H  | -1.51324351 | 1.98170056  | 1.02413357  |

|   |             |             |             |
|---|-------------|-------------|-------------|
| C | -1.56428869 | -1.52468397 | 0.95227593  |
| H | -1.92462650 | -2.44865970 | 0.55062245  |
| H | -0.51637394 | -1.60722105 | 1.15218170  |
| H | -2.08440613 | -1.30378796 | 1.86089180  |
| C | -1.67231300 | -0.65360548 | -2.17844103 |
| H | -0.64656504 | -0.56641818 | -2.47022775 |
| H | -1.98720739 | -1.67101338 | -2.28150748 |
| H | -2.27528749 | -0.02856167 | -2.80345463 |
| C | -4.29842815 | -2.49944663 | -1.36004663 |
| H | -5.09680565 | -3.20993701 | -1.41197728 |
| H | -4.18060801 | -2.02512676 | -2.31190748 |
| H | -3.39084616 | -3.00138920 | -1.09689536 |
| C | -4.60069884 | -2.06113091 | 1.69794749  |
| H | -5.57523342 | -2.39333478 | 1.98919125  |
| H | -3.94592912 | -2.90357955 | 1.61759259  |
| H | -4.22062559 | -1.38284008 | 2.43304332  |
| C | -6.55896926 | -0.62670507 | -0.26093011 |
| H | -7.18324085 | -1.49567421 | -0.26973971 |
| H | -6.85336383 | 0.01582499  | 0.54242968  |
| H | -6.66007126 | -0.10547562 | -1.18990710 |
| C | -6.12454383 | 1.95096892  | -0.11939581 |
| H | -6.50331511 | 1.47029494  | -0.99711151 |

|   |             |            |             |
|---|-------------|------------|-------------|
| H | -6.49750483 | 1.45115178 | 0.75007697  |
| H | -6.44200795 | 2.97271568 | -0.10714526 |
| C | -3.58811467 | 2.85870838 | 1.43562782  |
| H | -2.81898485 | 3.54628187 | 1.15175812  |
| H | -4.41183043 | 3.39804544 | 1.85456442  |
| H | -3.20376736 | 2.17371361 | 2.16223591  |
| C | -3.59411305 | 2.88911566 | -1.67172151 |
| H | -4.30127935 | 3.66397341 | -1.88246139 |
| H | -2.63816016 | 3.32446000 | -1.46793394 |
| H | -3.51644666 | 2.23760037 | -2.51694087 |

### TS1<sup>•-</sup> (Step II)

$v_i = -334.33$

Energy = -1851.95

-1 2

|   |            |             |             |
|---|------------|-------------|-------------|
| C | 4.49531500 | -0.40387900 | 0.23141800  |
| C | 3.94679000 | 0.78936500  | -0.29871200 |
| C | 2.62034700 | 0.87767500  | -0.66393100 |
| C | 1.73868400 | -0.25491800 | -0.52895700 |
| C | 2.30624000 | -1.46254200 | 0.01615100  |
| C | 3.63767200 | -1.51972600 | 0.37534800  |
| H | 5.53974900 | -0.45844700 | 0.52423600  |
| H | 4.58762500 | 1.66086000  | -0.43112600 |



|    |             |             |             |
|----|-------------|-------------|-------------|
| H  | 2.23078400  | 1.80085400  | -1.08198600 |
| H  | 1.67558800  | -2.34018300 | 0.11842300  |
| H  | 4.03570000  | -2.45510000 | 0.76810000  |
| C  | 0.34159800  | -0.14392400 | -0.79235400 |
| F  | -0.27599100 | -1.33491000 | -1.05655000 |
| F  | 0.02155900  | 0.74145400  | -1.80751600 |
| F  | -5.07268268 | -1.23638722 | -0.62830301 |
| N  | -0.88693232 | 0.62441068  | 0.64530491  |
| Si | -3.58790868 | -0.62334122 | -0.27624401 |
| Si | -1.24601532 | 2.31899068  | 0.45005691  |
| Si | -0.61305732 | -0.00169532 | 2.24941691  |
| C  | 0.30304736  | 3.42353057  | 0.07058829  |
| H  | 0.97718174  | 2.88665391  | -0.56360906 |
| H  | -0.01048030 | 4.32092839  | -0.42061183 |
| H  | 0.79682023  | 3.67221415  | 0.98669136  |
| C  | -2.53974093 | 2.67871721  | -0.95011125 |
| H  | -2.75332545 | 3.72682138  | -0.97766656 |
| H  | -2.13903925 | 2.37145311  | -1.89347064 |
| H  | -3.44040750 | 2.13628290  | -0.75145391 |
| C  | -2.00565700 | 3.05385112  | 2.07687117  |
| H  | -2.83468512 | 2.45251437  | 2.38672030  |
| H  | -1.26228551 | 3.06019164  | 2.84645459  |

|   |             |             |             |
|---|-------------|-------------|-------------|
| H | -2.33897782 | 4.05415684  | 1.89470176  |
| C | 0.90232883  | 0.75111968  | 3.19835019  |
| H | 1.27275455  | 0.03625956  | 3.90309113  |
| H | 1.67467457  | 0.99633132  | 2.49959894  |
| H | 0.59536275  | 1.63598043  | 3.71574103  |
| C | -0.36107479 | -1.92420620 | 2.18572447  |
| H | 0.52696370  | -2.14940872 | 1.63293928  |
| H | -0.26759713 | -2.30485001 | 3.18135101  |
| H | -1.20361099 | -2.37871337 | 1.70775377  |
| C | -2.15157909 | 0.32423879  | 3.38533844  |
| H | -2.01042048 | 1.23827804  | 3.92339651  |
| H | -3.03164627 | 0.39822175  | 2.78126205  |
| H | -2.26123629 | -0.48401577 | 4.07786993  |
| C | -2.64296982 | -2.12101816 | 0.51600238  |
| H | -2.58930659 | -2.92286239 | -0.19044371 |
| H | -1.65332176 | -1.81613925 | 0.78534526  |
| H | -3.16510373 | -2.45009080 | 1.39006610  |
| C | -3.96958402 | 0.79180085  | 0.99469928  |
| H | -3.05147502 | 1.22678735  | 1.33050072  |
| H | -4.56855174 | 1.54267377  | 0.52318307  |
| H | -4.49923689 | 0.38645759  | 1.83139795  |
| C | -2.91278986 | 0.00993491  | -1.98117096 |

|   |             |             |             |
|---|-------------|-------------|-------------|
| H | -1.94398379 | 0.44253287  | -1.84270142 |
| H | -2.84262366 | -0.81080137 | -2.66408286 |
| H | -3.57940296 | 0.74735429  | -2.37707453 |

**Int 1**

0 1

|    |             |             |             |
|----|-------------|-------------|-------------|
| C  | 3.73749500  | -2.83638300 | -0.38371100 |
| C  | 3.77101100  | -1.73803400 | -1.24598300 |
| C  | 2.86872700  | -0.68994300 | -1.07633400 |
| C  | 1.92600200  | -0.73594000 | -0.04280300 |
| C  | 1.88828100  | -1.83807600 | 0.81528000  |
| C  | 2.79693100  | -2.88350300 | 0.64534000  |
| H  | 4.44345000  | -3.65128900 | -0.51379300 |
| H  | 4.50040100  | -1.69707500 | -2.04927100 |
| H  | 2.89447700  | 0.16843400  | -1.73989700 |
| H  | 1.15680300  | -1.87016900 | 1.61347100  |
| H  | 2.76852900  | -3.73438100 | 1.31928100  |
| C  | 0.92132900  | 0.39311800  | 0.08487300  |
| F  | 0.19773900  | 0.22675500  | 1.26075300  |
| F  | -0.02442800 | 0.25753900  | -0.92915000 |
| N  | 1.43490600  | 1.71377400  | 0.00082600  |
| Si | 2.56124500  | 2.28940200  | 1.23960500  |
| Si | 0.61976100  | 2.86548000  | -1.06968300 |

|   |             |            |             |
|---|-------------|------------|-------------|
| C | -1.26485374 | 3.09811321 | -0.67255698 |
| H | -1.56989714 | 4.08395694 | -0.95533011 |
| H | -1.83619275 | 2.37736997 | -1.21936674 |
| H | -1.42792334 | 2.96132065 | 0.37605930  |
| C | 1.54239686  | 4.53705164 | -0.72589334 |
| H | 2.58974305  | 4.40952239 | -0.90394458 |
| H | 1.15987201  | 5.29585993 | -1.37611231 |
| H | 1.38645177  | 4.82772150 | 0.29199278  |
| C | 0.83900146  | 2.39682102 | -2.93941356 |
| H | 0.61702995  | 3.24784639 | -3.54882679 |
| H | 1.84825818  | 2.08697793 | -3.11347718 |
| H | 0.17263746  | 1.59715166 | -3.18717944 |
| C | 3.96365626  | 3.32362351 | 0.38682806  |
| H | 3.79194118  | 4.36593362 | 0.55713244  |
| H | 4.91167783  | 3.04642984 | 0.79831169  |
| H | 3.96084431  | 3.12892797 | -0.66530584 |
| C | 1.67327812  | 3.41889004 | 2.54320447  |
| H | 1.97101604  | 3.12792913 | 3.52889909  |
| H | 1.94584754  | 4.43983850 | 2.37506714  |
| H | 0.61321602  | 3.31186727 | 2.44464246  |
| C | 3.31690116  | 0.74648653 | 2.14071300  |
| H | 2.52703556  | 0.13737851 | 2.52801100  |

|   |            |            |            |
|---|------------|------------|------------|
| H | 3.89848559 | 0.17716913 | 1.44606400 |
| H | 3.94196161 | 1.07392290 | 2.94506670 |

## TS2

$v_i = -361.60$

Energy = -1106.79

0 1

|    |             |             |             |
|----|-------------|-------------|-------------|
| C  | 3.68343200  | 0.35340300  | 0.50310500  |
| C  | 3.40214500  | -0.55743900 | -0.51802400 |
| C  | 2.08217500  | -0.84863700 | -0.84872100 |
| C  | 1.03434200  | -0.21224000 | -0.16380800 |
| C  | 1.32168100  | 0.69534900  | 0.86891800  |
| C  | 2.64308500  | 0.97600300  | 1.19869600  |
| H  | 4.71464300  | 0.57454900  | 0.76158000  |
| H  | 4.21186500  | -1.04193500 | -1.05418500 |
| H  | 1.85435000  | -1.55493700 | -1.63783500 |
| H  | 0.50841200  | 1.15228600  | 1.42197900  |
| H  | 2.86338800  | 1.67201300  | 2.00157400  |
| C  | -0.36389600 | -0.49162500 | -0.51107100 |
| F  | -1.06559900 | -1.55459700 | 0.93702700  |
| F  | -0.48733400 | -1.49748900 | -1.38999700 |
| N  | -1.40329600 | 0.30954100  | -0.35898400 |
| Si | -2.64822100 | -0.64669300 | 0.78342700  |

|    |             |             |             |
|----|-------------|-------------|-------------|
| Si | -1.54677700 | 2.03087700  | -0.68634700 |
| C  | -0.04964788 | 2.54198310  | -1.80927841 |
| H  | 0.79381752  | 2.77662526  | -1.19412869 |
| H  | 0.19946157  | 1.73167694  | -2.46215544 |
| H  | -0.31648694 | 3.39954574  | -2.39089963 |
| C  | -1.50874971 | 3.09435821  | 0.93573858  |
| H  | -0.68181106 | 3.77235456  | 0.89841016  |
| H  | -2.42039548 | 3.64806482  | 1.02065614  |
| H  | -1.40306880 | 2.44921419  | 1.78280454  |
| C  | -3.21675828 | 2.34572867  | -1.62209854 |
| H  | -4.03125875 | 2.27468805  | -0.93185061 |
| H  | -3.20270373 | 3.32288423  | -2.05783868 |
| H  | -3.33738412 | 1.61326890  | -2.39271654 |
| C  | -3.82294038 | 0.88346761  | 0.57789626  |
| H  | -3.32737382 | 1.76355774  | 0.93110321  |
| H  | -4.07266603 | 1.00515298  | -0.45541385 |
| H  | -4.71669328 | 0.72564630  | 1.14463974  |
| C  | -2.79012903 | -0.77096469 | 2.71423477  |
| H  | -3.78607223 | -0.52144455 | 3.01546034  |
| H  | -2.56306910 | -1.76933861 | 3.02502942  |
| H  | -2.09951456 | -0.09065246 | 3.16714417  |
| C  | -3.60170479 | -2.04523361 | -0.16449325 |

|   |             |             |             |
|---|-------------|-------------|-------------|
| H | -3.12950061 | -2.98738909 | 0.02061826  |
| H | -4.61499887 | -2.08086068 | 0.17736319  |
| H | -3.58650521 | -1.83881076 | -1.21428303 |

### TS2<sup>••</sup>

$v_i = -506.96$

Energy = -1106.11

-1 2

|   |             |             |             |
|---|-------------|-------------|-------------|
| C | -3.74594200 | 0.38490200  | -0.49124500 |
| C | -3.42185000 | -0.59587100 | 0.48655600  |
| C | -2.09268700 | -0.87423900 | 0.80236800  |
| C | -0.99273900 | -0.17239100 | 0.16443500  |
| C | -1.35896600 | 0.80879900  | -0.83984000 |
| C | -2.69224700 | 1.07684100  | -1.14960300 |
| H | -4.77850800 | 0.59778300  | -0.73407200 |
| H | -4.22158000 | -1.12784700 | 0.98714800  |
| H | -1.86986700 | -1.62518800 | 1.54942800  |
| H | -0.57582300 | 1.34287000  | -1.36168800 |
| H | -2.93530500 | 1.81940100  | -1.89966800 |
| C | 0.34892600  | -0.50867100 | 0.42787600  |
| F | 1.06226700  | -1.69683800 | -0.59856000 |
| F | 0.54904500  | -1.24000800 | 1.58181100  |
| N | 1.46645600  | 0.33486200  | 0.06530900  |

|    |            |             |             |
|----|------------|-------------|-------------|
| Si | 2.48288900 | -0.64123100 | -0.99724400 |
| Si | 1.72310500 | 1.88353000  | 0.77044300  |
| C  | 2.09396580 | -0.90399660 | -2.87960767 |
| H  | 3.00908312 | -0.92155009 | -3.43382078 |
| H  | 1.57941139 | -1.83287397 | -3.01121537 |
| H  | 1.47889377 | -0.10249305 | -3.23199732 |
| C  | 3.84449526 | 0.72343119  | -1.21478824 |
| H  | 3.40378349 | 1.60317837  | -1.63516667 |
| H  | 4.26968912 | 0.95821071  | -0.26137923 |
| H  | 4.61100191 | 0.36157864  | -1.86780455 |
| C  | 3.64938392 | -2.04496747 | -0.33966243 |
| H  | 4.58079964 | -2.01005889 | -0.86515853 |
| H  | 3.82441039 | -1.90247855 | 0.70626426  |
| H  | 3.18631749 | -2.99659046 | -0.49740645 |
| C  | 1.80658617 | 3.30706552  | -0.54491913 |
| H  | 1.15230594 | 4.10163890  | -0.25256569 |
| H  | 2.80909174 | 3.67563918  | -0.60844891 |
| H  | 1.50440453 | 2.92906399  | -1.49922574 |
| C  | 3.39123479 | 1.98623726  | 1.75552889  |
| H  | 4.16313929 | 2.35432075  | 1.11242860  |
| H  | 3.27395837 | 2.64885383  | 2.58744566  |
| H  | 3.65665730 | 1.01218495  | 2.11003276  |



|   |             |            |            |
|---|-------------|------------|------------|
| C | 0.30890702  | 2.33953491 | 2.01772148 |
| H | -0.58786604 | 2.55717448 | 1.47612098 |
| H | 0.13586668  | 1.51523872 | 2.67764028 |
| H | 0.59872498  | 3.19769933 | 2.58733484 |

**TS2'**

$v_i = -506.96$

Energy = -2153.35

0 1

|   |             |             |             |
|---|-------------|-------------|-------------|
| C | -5.03515300 | -0.60621900 | -0.33467100 |
| C | -4.51889900 | -0.77294700 | 0.95093100  |
| C | -3.14945200 | -0.63627900 | 1.17911700  |
| C | -2.29287400 | -0.31991900 | 0.11869200  |
| C | -2.80970100 | -0.16167800 | -1.17218200 |
| C | -4.17770900 | -0.30316000 | -1.39514500 |
| H | -6.10146300 | -0.71679500 | -0.51172400 |
| H | -5.18011600 | -1.01485200 | 1.77827200  |
| H | -2.74442900 | -0.77275600 | 2.17637300  |
| H | -2.13853000 | 0.05513300  | -1.99602200 |
| H | -4.57367400 | -0.18384700 | -2.39969700 |
| C | -0.83615200 | -0.11774800 | 0.40300800  |
| F | -0.13260500 | -1.00376700 | -0.87701400 |
| F | -0.41985600 | -0.99010200 | 1.38578100  |

|    |             |             |             |
|----|-------------|-------------|-------------|
| N  | -0.21778500 | 1.04914600  | 0.44370900  |
| Si | -0.93352300 | 2.61846500  | 0.05841200  |
| H  | -0.41508600 | 3.15147700  | -1.22762900 |
| H  | -2.40905200 | 2.51719900  | -0.01328000 |
| H  | -0.57537600 | 3.56633100  | 1.14231700  |
| N  | 2.27668100  | -0.25527600 | -0.09859500 |
| Si | 4.08329100  | 0.12595100  | -0.30931800 |
| H  | 4.26014700  | 1.54774000  | -0.66160300 |
| H  | 4.82247400  | -0.25823400 | 0.91335600  |
| H  | 4.56489300  | -0.75663900 | -1.39991000 |
| Si | 2.24103700  | -1.92575700 | 0.68732700  |
| H  | 2.12954800  | -1.74487000 | 2.15016000  |
| H  | 1.20743900  | -2.81393700 | 0.13940600  |
| H  | 3.57046100  | -2.51591900 | 0.38210400  |
| H  | 2.73288900  | 0.44089800  | -2.45106500 |
| H  | 0.51262600  | 0.83567100  | -2.19601600 |
| H  | 1.48331600  | -1.50816700 | -2.50483800 |
| Si | 1.50903200  | -0.18934000 | -1.83011400 |
| H  | 3.16167400  | 1.21461800  | 1.57906100  |
| H  | 1.15136700  | 0.93938600  | 2.50969800  |
| H  | 1.70657100  | 2.54769600  | 0.55057000  |
| Si | 1.69400800  | 1.18248700  | 1.14706800  |

TS2'•-

$v_i = -265.78$

Energy = -2153.36

-1 2

|    |             |             |             |
|----|-------------|-------------|-------------|
| C  | -5.23232500 | 0.72845300  | -0.35397600 |
| C  | -4.83350400 | -0.37157100 | -1.10313300 |
| C  | -3.49292100 | -0.76001500 | -1.12816200 |
| C  | -2.54742000 | -0.05955700 | -0.36552300 |
| C  | -2.95572600 | 1.04097400  | 0.39416800  |
| C  | -4.29047600 | 1.43986700  | 0.39159200  |
| H  | -6.27126300 | 1.03723400  | -0.35077900 |
| H  | -5.55207000 | -0.93756100 | -1.68780600 |
| H  | -3.17728000 | -1.61221400 | -1.72379100 |
| H  | -2.24675800 | 1.57093400  | 1.01783600  |
| H  | -4.59182100 | 2.30045800  | 0.98462700  |
| C  | -1.12506400 | -0.53574700 | -0.37099800 |
| F  | -0.25074000 | 0.97051900  | -0.63373400 |
| F  | -0.79597100 | -1.03359800 | -1.60621000 |
| N  | -0.49999900 | -1.12381000 | 0.62471600  |
| Si | -1.10511700 | -1.43071600 | 2.25287900  |
| N  | 2.04129200  | -0.29679100 | -0.40797300 |
| Si | 3.85384400  | -0.44673300 | -0.03640400 |

|    |             |             |             |
|----|-------------|-------------|-------------|
| Si | 1.92662400  | -0.25058700 | -2.25632200 |
| Si | 1.43424500  | 1.31008400  | 0.44057300  |
| Si | 1.34205500  | -1.99159400 | 0.32957400  |
| C  | 1.53434600  | 2.86103400  | -0.72103900 |
| H  | 0.59924300  | 2.93183600  | -1.30649000 |
| H  | 1.70678400  | 3.77370800  | -0.10987500 |
| H  | 2.38976200  | 2.71355300  | -1.40912900 |
| C  | 3.09626300  | 1.53692500  | 1.42430900  |
| H  | 3.53278100  | 0.55646500  | 1.74263800  |
| H  | 3.79242900  | 2.03638000  | 0.72316500  |
| H  | 2.91042500  | 2.11641500  | 2.33818900  |
| C  | 0.12354500  | 1.37810400  | 1.87906900  |
| H  | 0.47350400  | 2.03633000  | 2.70363300  |
| H  | -0.79982500 | 1.76443700  | 1.38712600  |
| H  | -0.04222900 | 0.36299700  | 2.28993800  |
| C  | 0.09960547  | -0.61115153 | 3.53372163  |
| H  | -0.30572536 | -0.71081229 | 4.51894985  |
| H  | 1.05193749  | -1.09691483 | 3.48902548  |
| H  | 0.21706434  | 0.42630020  | 3.29963337  |
| C  | -2.90237874 | -0.73528304 | 2.47609024  |
| H  | -2.88375642 | 0.33191569  | 2.40098975  |
| H  | -3.53697910 | -1.13549903 | 1.71319474  |

|   |             |             |             |
|---|-------------|-------------|-------------|
| H | -3.27767350 | -1.01870242 | 3.43719756  |
| C | -1.10078052 | -3.34661998 | 2.55766274  |
| H | -0.13239646 | -3.74156014 | 2.33148895  |
| H | -1.33660318 | -3.54531120 | 3.58226484  |
| H | -1.83095018 | -3.80969809 | 1.92733669  |
| C | 0.42378928  | -3.34564360 | -0.71298907 |
| H | 1.10236740  | -3.77005791 | -1.42313288 |
| H | 0.06299201  | -4.11376128 | -0.06128318 |
| H | -0.40045752 | -2.89993244 | -1.22957281 |
| C | 1.41931357  | -2.11740832 | 2.26394777  |
| H | 0.47721597  | -1.82474348 | 2.67831404  |
| H | 1.63567580  | -3.12624208 | 2.54739410  |
| H | 2.18766064  | -1.47063176 | 2.63303158  |
| C | 4.11129905  | -1.05359403 | 1.78816077  |
| H | 4.09830285  | -2.12321586 | 1.81346370  |
| H | 5.05314262  | -0.69963214 | 2.15222349  |
| H | 3.32444998  | -0.67264594 | 2.40512681  |
| C | 4.65488645  | 1.30073271  | -0.29773632 |
| H | 5.01641931  | 1.67102528  | 0.63878779  |
| H | 5.46878510  | 1.22042288  | -0.98767784 |
| H | 3.92126678  | 1.97455799  | -0.68845575 |
| C | 4.65519142  | -1.67096269 | -1.31025798 |

|             |             |             |             |
|-------------|-------------|-------------|-------------|
| H           | 4.87230204  | -1.14884443 | -2.21863868 |
| H           | 5.56096280  | -2.06814159 | -0.90193564 |
| H           | 3.97428947  | -2.47112128 | -1.51278890 |
| C           | 1.60627555  | -2.05593917 | -2.89010462 |
| H           | 0.56842755  | -2.29289515 | -2.78229279 |
| H           | 1.88292843  | -2.12627918 | -3.92132500 |
| H           | 2.19078376  | -2.74437827 | -2.31625641 |
| C           | 0.64320240  | 1.04538012  | -2.91730478 |
| H           | 1.12396066  | 1.99357900  | -3.03850866 |
| H           | 0.25855170  | 0.71737704  | -3.86036247 |
| H           | -0.16077143 | 1.13997000  | -2.21760568 |
| C           | 3.69233654  | 0.32334527  | -2.81887063 |
| H           | 3.93087206  | -0.12706643 | -3.75968417 |
| H           | 3.70585302  | 1.38849456  | -2.91973827 |
| H           | 4.41415654  | 0.02515779  | -2.08746096 |
| C           | 3.12524404  | -2.69082327 | 0.02149079  |
| H           | 3.34001841  | -2.67089817 | -1.02654307 |
| H           | 3.83948503  | -2.08889202 | 0.54344730  |
| H           | 3.17973976  | -3.69833686 | 0.37764605  |
| <b>Int2</b> |             |             |             |
| 0 1         |             |             |             |
| C           | -3.42419900 | -0.34042000 | -0.00004200 |

|    |             |             |             |
|----|-------------|-------------|-------------|
| C  | -2.91750000 | 0.96020700  | -0.00008700 |
| C  | -1.54057400 | 1.17455100  | -0.00005700 |
| C  | -0.66236300 | 0.08106100  | 0.00002000  |
| C  | -1.17564300 | -1.22555000 | 0.00007000  |
| C  | -2.55093200 | -1.43245800 | 0.00003700  |
| H  | -4.49783300 | -0.50438700 | -0.00006800 |
| H  | -3.59478000 | 1.80875100  | -0.00014700 |
| H  | -1.14078300 | 2.18137200  | -0.00009100 |
| H  | -0.48020700 | -2.05760900 | 0.00013200  |
| H  | -2.94474200 | -2.44424600 | 0.00007500  |
| C  | 0.79924600  | 0.27271900  | 0.00005600  |
| F  | 1.13390800  | 1.61033900  | 0.00014300  |
| N  | 1.67748900  | -0.62083500 | 0.00002000  |
| Si | 3.41304300  | -0.36622600 | -0.00007100 |
| C  | 3.98365546  | 0.60385628  | 1.58010044  |
| H  | 4.98994722  | 0.33188432  | 1.82157125  |
| H  | 3.93428561  | 1.65569064  | 1.39008175  |
| H  | 3.34145264  | 0.35903903  | 2.40018583  |
| C  | 4.25912991  | -2.11200287 | -0.00031452 |
| H  | 3.94818387  | -2.65892805 | -0.86581173 |
| H  | 5.32237346  | -1.99304856 | -0.01653245 |
| H  | 3.97348836  | -2.64690855 | 0.88126635  |

|   |            |            |             |
|---|------------|------------|-------------|
| C | 3.98334459 | 0.60420654 | -1.58013960 |
| H | 5.02069234 | 0.41380626 | -1.76057624 |
| H | 3.40947921 | 0.28126890 | -2.42351959 |
| H | 3.83440987 | 1.65278282 | -1.42780373 |

### TS3

$v_i = -425.27$

Energy = -833.62

0 1

|   |             |             |             |
|---|-------------|-------------|-------------|
| C | 3.43585500  | -0.16294500 | 0.00007500  |
| C | 2.60784900  | -1.28707600 | 0.00009400  |
| C | 1.22290000  | -1.13965200 | 0.00003000  |
| C | 0.66732500  | 0.14709200  | -0.00004400 |
| C | 1.49860200  | 1.28142600  | -0.00007600 |
| C | 2.87993200  | 1.11948200  | -0.00001500 |
| H | 4.51481100  | -0.28475600 | 0.00012100  |
| H | 3.04074400  | -2.28238700 | 0.00015000  |
| H | 0.56615800  | -1.99999100 | 0.00001000  |
| H | 1.05155600  | 2.26970700  | -0.00015300 |
| H | 3.52346700  | 1.99352400  | -0.00004200 |
| C | -0.76249400 | 0.38092600  | -0.00009600 |
| F | -1.55339700 | -1.10826500 | 0.00015300  |



|    |             |             |             |
|----|-------------|-------------|-------------|
| N  | -1.66052400 | 1.18976900  | -0.00021300 |
| Si | -3.21796300 | 0.00540400  | 0.00000400  |
| C  | -3.93044595 | 0.78452648  | 1.62755929  |
| H  | -3.88280177 | 1.85150080  | 1.56278404  |
| H  | -4.94848924 | 0.47991368  | 1.75285451  |
| H  | -3.35301404 | 0.45188695  | 2.46471120  |
| C  | -3.93105759 | 0.78513745  | -1.62699073 |
| H  | -3.37594227 | 0.42534989  | -2.46800196 |
| H  | -4.95931712 | 0.50916335  | -1.73385810 |
| H  | -3.85121795 | 1.85095816  | -1.57647480 |
| C  | -3.98982183 | -1.77443696 | -0.00032688 |
| H  | -3.66843712 | -2.30240961 | -0.87374359 |
| H  | -3.66949471 | -2.30227580 | 0.87355909  |
| H  | -5.05724948 | -1.70028990 | -0.00097864 |

**TS3<sup>o-</sup>**

$v_i = -296.12$

Energy = -833.631

-1 2

|   |            |             |             |
|---|------------|-------------|-------------|
| C | 4.38597100 | -0.10085600 | 0.10367700  |
| C | 3.53125900 | -1.22503700 | 0.02403100  |
| C | 2.16488600 | -1.09332700 | -0.09943500 |
| C | 1.56022900 | 0.21267100  | -0.15289000 |

|    |             |             |             |
|----|-------------|-------------|-------------|
| C  | 2.43961000  | 1.35757700  | -0.06211200 |
| C  | 3.80307100  | 1.18379300  | 0.06121400  |
| H  | 5.46108900  | -0.22208300 | 0.20035800  |
| H  | 3.95933000  | -2.22605100 | 0.06505400  |
| H  | 1.50338100  | -1.94926600 | -0.14287500 |
| H  | 2.00823000  | 2.35372800  | -0.09512100 |
| H  | 4.44008600  | 2.06544300  | 0.12556400  |
| C  | 0.20049900  | 0.41978600  | -0.27972700 |
| F  | -0.68815000 | -1.26916500 | 0.08333500  |
| N  | -0.83784300 | 1.05252900  | -0.48962400 |
| Si | -2.26202500 | 0.04561000  | 0.02585600  |
| C  | -2.46079600 | -0.44433300 | 1.86161300  |
| H  | -3.37261900 | -0.03796500 | 2.31517900  |
| H  | -2.45541000 | -1.53241800 | 1.97712700  |
| H  | -1.60307700 | -0.06649700 | 2.42971900  |
| C  | -3.56009000 | 1.48626200  | -0.09784600 |
| H  | -3.58501400 | 1.91495600  | -1.10844500 |
| H  | -4.57821700 | 1.14585400  | 0.14161300  |
| H  | -3.31795800 | 2.30567600  | 0.59222000  |
| C  | -2.97232000 | -1.15384400 | -1.27733700 |
| H  | -2.43569100 | -1.00850900 | -2.22232700 |
| H  | -2.81241300 | -2.19371700 | -0.97821900 |

H -4.03903500 -0.98905800 -1.47159800

**TS3'**

$v_i = -249.98$

Energy = -1762.24

0 1

C -5.19630700 -0.23627100 0.04699800

C -4.69616600 1.06391200 -0.06334200

C -3.32309400 1.28160600 -0.10611400

C -2.43644100 0.18997700 -0.04042500

C -2.93937800 -1.11380100 0.07198600

C -4.31708800 -1.31827800 0.11499100

H -6.26927600 -0.40415500 0.08043900

H -5.37608300 1.90933500 -0.11565300

H -2.92199800 2.28599100 -0.19142000

H -2.24915000 -1.94338000 0.12758000

H -4.70395100 -2.32950000 0.20187000

C -1.02220800 0.51546400 -0.09121900

F -0.22715600 -1.12092900 0.02478900

N -0.22649200 1.38766800 -0.17046500

N 2.17634300 -0.05939400 0.03189200

Si 3.99768300 -0.14292000 -0.26336300

H 4.36355900 0.49744700 -1.53816600

|    |            |             |             |
|----|------------|-------------|-------------|
| H  | 4.72679000 | 0.43666500  | 0.88424900  |
| H  | 4.30885700 | -1.59580600 | -0.29550000 |
| Si | 1.78397700 | -0.56173100 | 1.75471600  |
| H  | 2.83347700 | 0.08220600  | 2.58331500  |
| H  | 0.48138300 | -0.08664700 | 2.24174600  |
| H  | 1.92399800 | -2.03098100 | 1.84315900  |
| H  | 2.55774600 | -1.22597400 | -2.20880300 |
| H  | 0.37023000 | -0.69176000 | -2.19665700 |
| H  | 1.34606000 | -2.63980700 | -0.83213000 |
| Si | 1.38037200 | -1.22485600 | -1.26246500 |
| H  | 3.23277400 | 2.12166800  | -0.05536500 |
| H  | 1.37040600 | 2.67692700  | 1.04584100  |
| H  | 1.54167600 | 2.35253600  | -1.53758600 |
| Si | 1.72675500 | 1.86379500  | -0.14940600 |

**TS3'**

$v_i = -249.98$

Energy = -1762.25

-1 2

|   |            |             |             |
|---|------------|-------------|-------------|
| C | 5.39897500 | 0.30511700  | 0.14457500  |
| C | 4.98560200 | -0.89142400 | -0.44894000 |
| C | 3.63386900 | -1.19295700 | -0.53390100 |
| C | 2.67666400 | -0.28989700 | -0.02294000 |

|    |             |             |             |
|----|-------------|-------------|-------------|
| C  | 3.09274400  | 0.90941000  | 0.57925100  |
| C  | 4.44992000  | 1.19902200  | 0.65907900  |
| H  | 6.45972600  | 0.54007100  | 0.21722400  |
| H  | 5.71734100  | -1.58264000 | -0.85336900 |
| H  | 3.29677900  | -2.11704000 | -0.99091500 |
| H  | 2.34595900  | 1.58399800  | 0.96581000  |
| H  | 4.77802300  | 2.12766700  | 1.12641000  |
| C  | 1.30688300  | -0.71417300 | -0.16976600 |
| F  | 0.35724400  | 0.76671800  | 0.59398000  |
| N  | 0.53894900  | -1.53084000 | -0.53086700 |
| N  | -1.91660700 | -0.46622100 | 0.28417100  |
| Si | -3.75882000 | -0.41046000 | 0.13582400  |
| Si | -1.41053500 | -0.60137700 | 2.05516400  |
| Si | -1.26216200 | 1.16084800  | -0.49277600 |
| Si | -1.39948800 | -2.12949900 | -0.61567000 |
| C  | -1.32704400 | 2.69064700  | 0.71191200  |
| H  | -0.69943500 | 2.48438900  | 1.57890500  |
| H  | -0.92461900 | 3.56463600  | 0.14583500  |
| H  | -2.38118900 | 2.89165300  | 1.01602600  |
| C  | -2.87352600 | 1.57066700  | -1.53965300 |
| H  | -3.41152400 | 0.67491300  | -1.93923400 |
| H  | -3.54063900 | 2.13933500  | -0.84656400 |

|   |             |             |             |
|---|-------------|-------------|-------------|
| H | -2.55060100 | 2.19806800  | -2.39248100 |
| C | 0.00643000  | 1.07613800  | -1.97044000 |
| H | 0.15341900  | 2.13737000  | -2.29877700 |
| H | 0.96375800  | 0.65214700  | -1.64103500 |
| H | -0.44219000 | 0.47577300  | -2.81967300 |
| C | -4.33302232 | -0.74631515 | -1.68656263 |
| H | -4.85753758 | -1.67795805 | -1.72928560 |
| H | -4.98062081 | 0.04264044  | -2.00760041 |
| H | -3.47760761 | -0.78886747 | -2.32793223 |
| C | -4.26847879 | 1.37157775  | 0.70870216  |
| H | -4.52819359 | 1.96038966  | -0.14613628 |
| H | -5.10978427 | 1.30770342  | 1.36674863  |
| H | -3.44855882 | 1.82951625  | 1.22146289  |
| C | -4.55175931 | -1.68059144 | 1.36936094  |
| H | -4.50841009 | -1.28702237 | 2.36340532  |
| H | -5.57244261 | -1.85190968 | 1.09778100  |
| H | -4.01176784 | -2.60337841 | 1.32724904  |
| C | -1.72163849 | 1.12487635  | 2.88393658  |
| H | -1.94957138 | 0.98709087  | 3.92025785  |
| H | -0.84389252 | 1.72941760  | 2.78911105  |
| H | -2.54303955 | 1.61022900  | 2.39954716  |
| C | -2.64462608 | -1.89059875 | 2.81577327  |

|   |             |             |             |
|---|-------------|-------------|-------------|
| H | -3.53890921 | -1.38992027 | 3.12314721  |
| H | -2.88471172 | -2.63078162 | 2.08134273  |
| H | -2.19091548 | -2.36215970 | 3.66234103  |
| C | 0.38876615  | -1.26930487 | 2.33798504  |
| H | 0.70574042  | -1.03059705 | 3.33168816  |
| H | 0.40005143  | -2.33099533 | 2.20537276  |
| H | 1.05290425  | -0.81471525 | 1.63288302  |
| C | -3.26451662 | -2.65841798 | -0.54142065 |
| H | -3.73450170 | -2.19145032 | 0.29879077  |
| H | -3.75771023 | -2.35381678 | -1.44079720 |
| H | -3.32998729 | -3.72171011 | -0.44130357 |
| C | -0.73214291 | -3.64724161 | 0.39165711  |
| H | -0.82979194 | -4.53608818 | -0.19597920 |
| H | 0.29854982  | -3.49022052 | 0.63231635  |
| H | -1.29711503 | -3.75252122 | 1.29422163  |
| C | -1.23880964 | -2.00392134 | -2.54492185 |
| H | -0.20874277 | -1.88784502 | -2.81023022 |
| H | -1.62443724 | -2.89542033 | -2.99372126 |
| H | -1.79462740 | -1.15923676 | -2.89488553 |

### **Benzonitrile**

0 1

|   |            |            |            |
|---|------------|------------|------------|
| C | 2.18023600 | 0.00000000 | 0.00000000 |
|---|------------|------------|------------|

|   |             |             |            |
|---|-------------|-------------|------------|
| C | 1.48383400  | -1.21067300 | 0.00000000 |
| C | 0.09156900  | -1.21743300 | 0.00000000 |
| C | -0.60995200 | 0.00000000  | 0.00000000 |
| C | 0.09156900  | 1.21743300  | 0.00000000 |
| C | 1.48383400  | 1.21067300  | 0.00000000 |
| H | 3.26607400  | 0.00000000  | 0.00000000 |
| H | 2.02591200  | -2.15115600 | 0.00000000 |
| H | -0.45848600 | -2.15226000 | 0.00000000 |
| H | -0.45848600 | 2.15226000  | 0.00000000 |
| H | 2.02591200  | 2.15115600  | 0.00000000 |
| C | -2.04487500 | 0.00000000  | 0.00000000 |
| N | -3.20831600 | 0.00000000  | 0.00000000 |

## References

- (1) Frisch, M. J.; Trucks, G. W.; Schlegel, H. B.; Scuseria, G. E. .; Robb, M. A.; Cheeseman, J. R.; Scalmani, G.; Barone, V. . M.; B.; Petersson, G. A.; Nakatsuji, H.; Caricato, M.; Li, X.; Hratchian, H.; P.; Izmaylov, A. F.; Bloino, J.; Zheng, G.; Sonnenberg, J. L.; Hada, M. .; Ehara, M.; Toyota, K.; Fukuda, R.; Hasegawa, J.; Ishida, M. . N.; T.; Honda, Y.; Kitao, O.; Nakai, H.; Vreven, T.; Montgomery, J. A., J. .; Peralta, J. E.; Ogliaro, F.; Bearpark, M. J.; Heyd, J.; Brothers, E. N. .; Kudin, K. N.; Staroverov, V. N.; Kobayashi, R.; Normand, J. .; Raghavachari, K.; Rendell, A. P.; Burant, J. C.; Iyengar, S. S. .; Tomasi, J.; Cossi, M.; Rega, N.; Millam, N. J.; Klene, M.; Knox, J. E. .; Cross, J. B.; Bakken, V.; Adamo, C.; Jaramillo, J.; Gomperts, R. .; Stratmann, R. E.; Yazyev, O.; Austin, A. J.; Cammi, R.; Pomelli, C. .; Ochterski, J. W.; Martin, R. L.; Morokuma, K.; Zakrzewski, V. G. .; Voth, G. A.; Salvador, P.; Dannenberg, J. J.; Dapprich, S.; Daniels, A.; D.; Farkas, O.; Foresman, J. B.; Ortiz, J. V.; Cioslowski, J.; Fox, D. J. *Gaussian 09*. Gaussian, Inc.: Wallingford, CT,



- (2) Arshad, M. N.; Asiri, A. M.; Alamry, K. A.; Mahmood, T.; Gilani, M. A.; Ayub, K.; Birinji, A. S. Synthesis, Crystal Structure, Spectroscopic and Density Functional Theory (DFT) Study of N-[3-Anthracen-9-yl-1-(4-bromo-phenyl)-allylidene]-N-benzenesulfonohydrazine. *Spectrochim. Acta - Part A Mol. Biomol. Spectrosc.* **2015**. <https://doi.org/10.1016/j.saa.2015.01.101>.
- (3) Mkrtchyan, S.; Jakubczyk, M.; Lanka, S.; Yar, M.; Ayub, K.; Shkooor, M.; Pittelkow, M.; Iaroshenko, V. O. Mechanochemical Transformation of CF<sub>3</sub> Group: Synthesis of Amides and Schiff Bases. *Adv. Synth. Catal.* **2021**, *363* (24), 5448–5460. <https://doi.org/10.1002/adsc.202100538>.
- (4) Tirado-Rives, J.; Jorgensen, W. L. Performance of B3LYP Density Functional Methods for a Large Set of Organic Molecules. *J. Chem. Theory Comput.* **2008**, *4*, 2, 297–306. <https://doi.org/10.1021/ct700248k>.
- (5) Mukhtar, A.; Sarfaraz, S.; Ayub, K. Organic Transformations in the Confined Space of Porous Organic Cage CC<sub>2</sub>; Catalysis or Inhibition. *RSC Adv.* **2022**, *12* (37), 24397–24411. <https://doi.org/10.1039/D2RA03399B>.
